# Supplementary material for: Range-Wide Phylogeography and Ecological Niche Modeling Provide Insights into the Evolutionary History of the Mongolian Racerunner (Eremias argus) in Northeast Asia
Source: MDPI journal article supplement (doi:10.3390/ani14071124), 2024-04-07
Supplement: s1 [file s1]

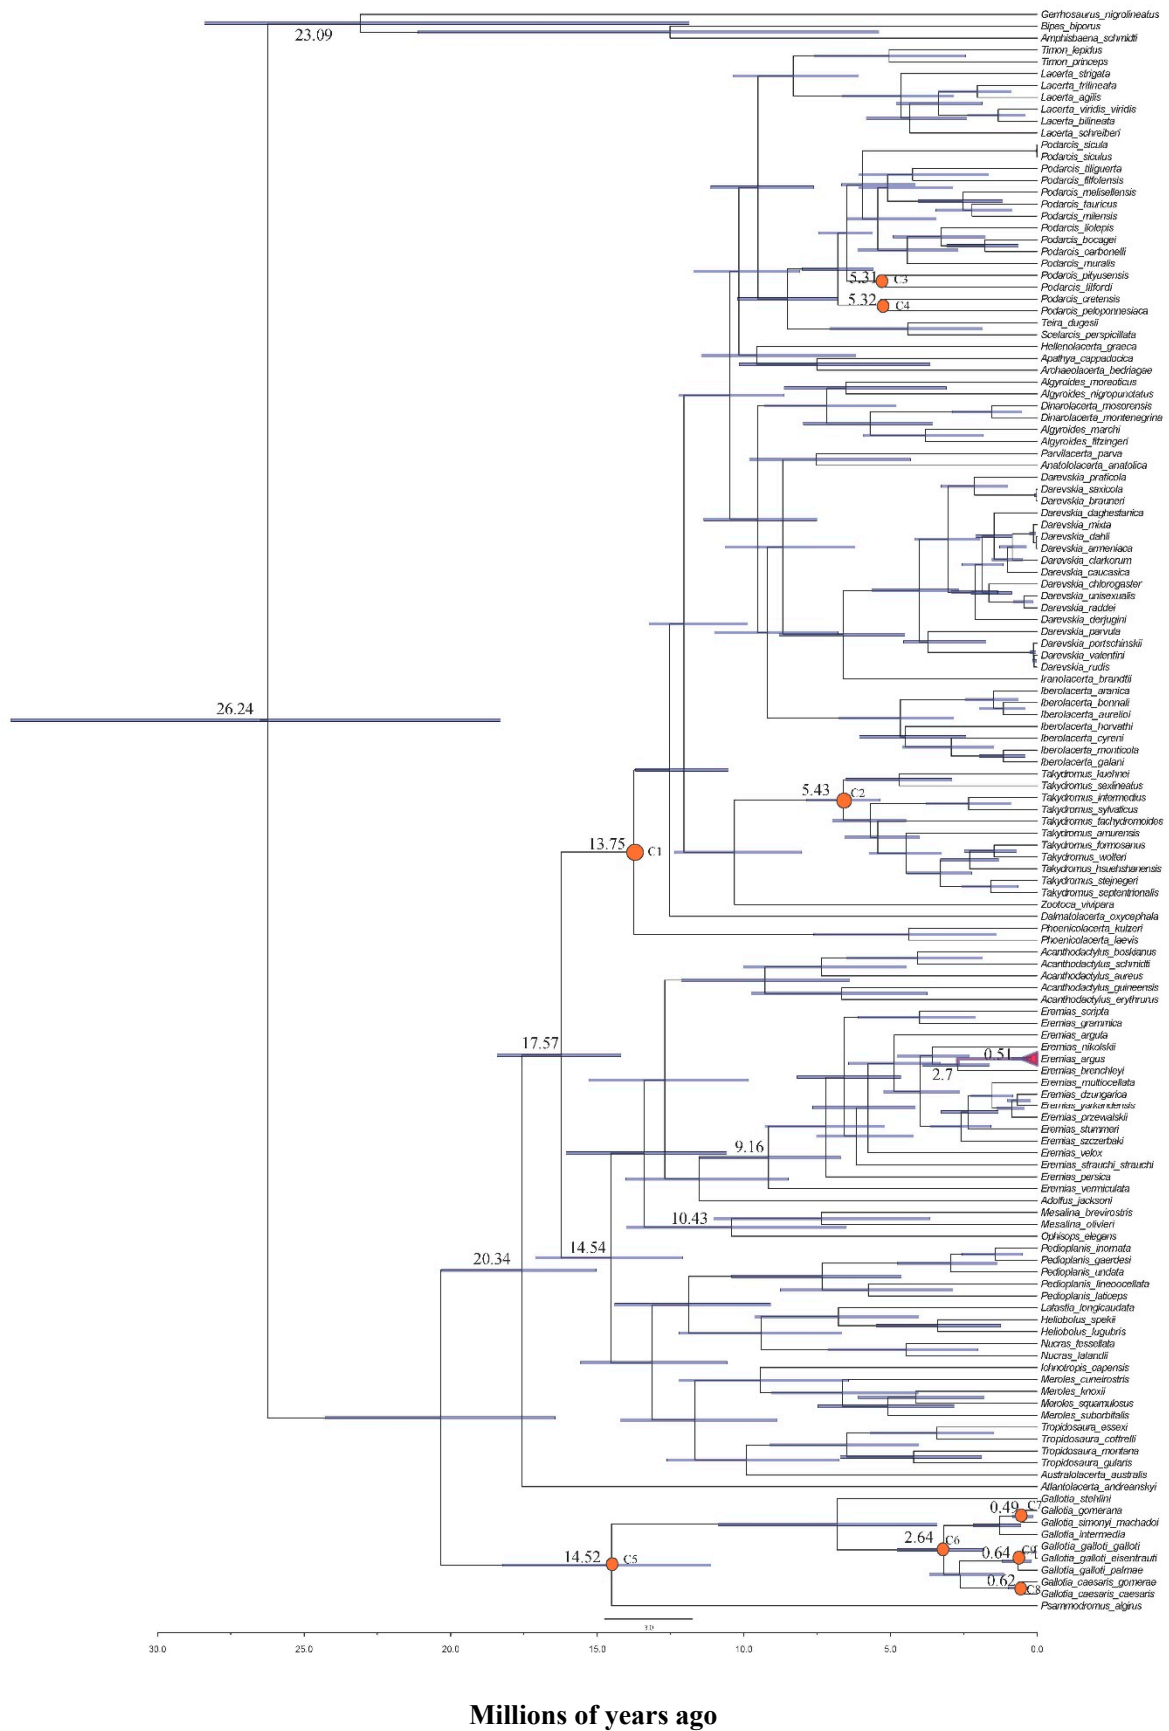

**Figure S1.** Molecular dating of the most recent common ancestor (MRCA) for *Eremias argus* using calibrations in outgroups. Orange circles indicated the different calibration points.

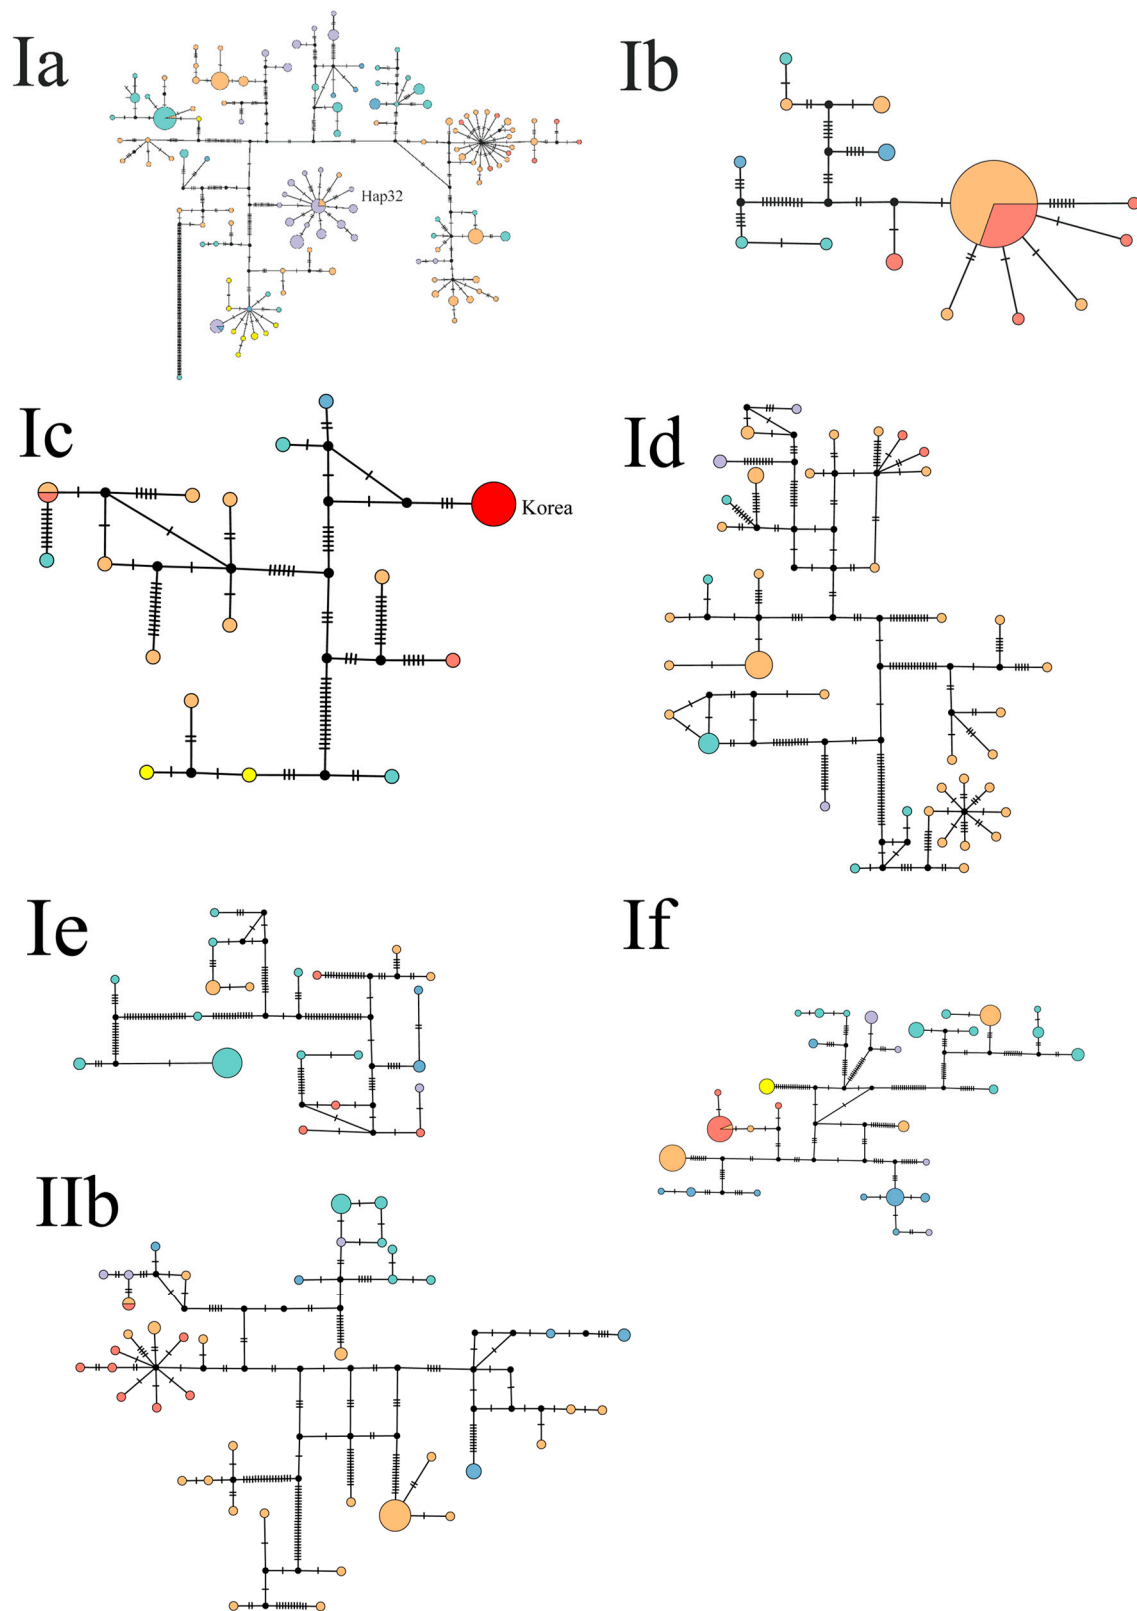

**Figure S2.** Median-joining networks of mtDNA cyt *b* haplotypes of *Eremias argus*. Distribution of haplotype group by species entire range refers to Figure 1. Short bars crossing network branches indicate mutation steps; small dark circles indicate median vectors inferred by PopART v1.7 software. Circle size corresponds to the relative number of individuals sharing a particular haplotype, with the smallest in each clade being one individual.

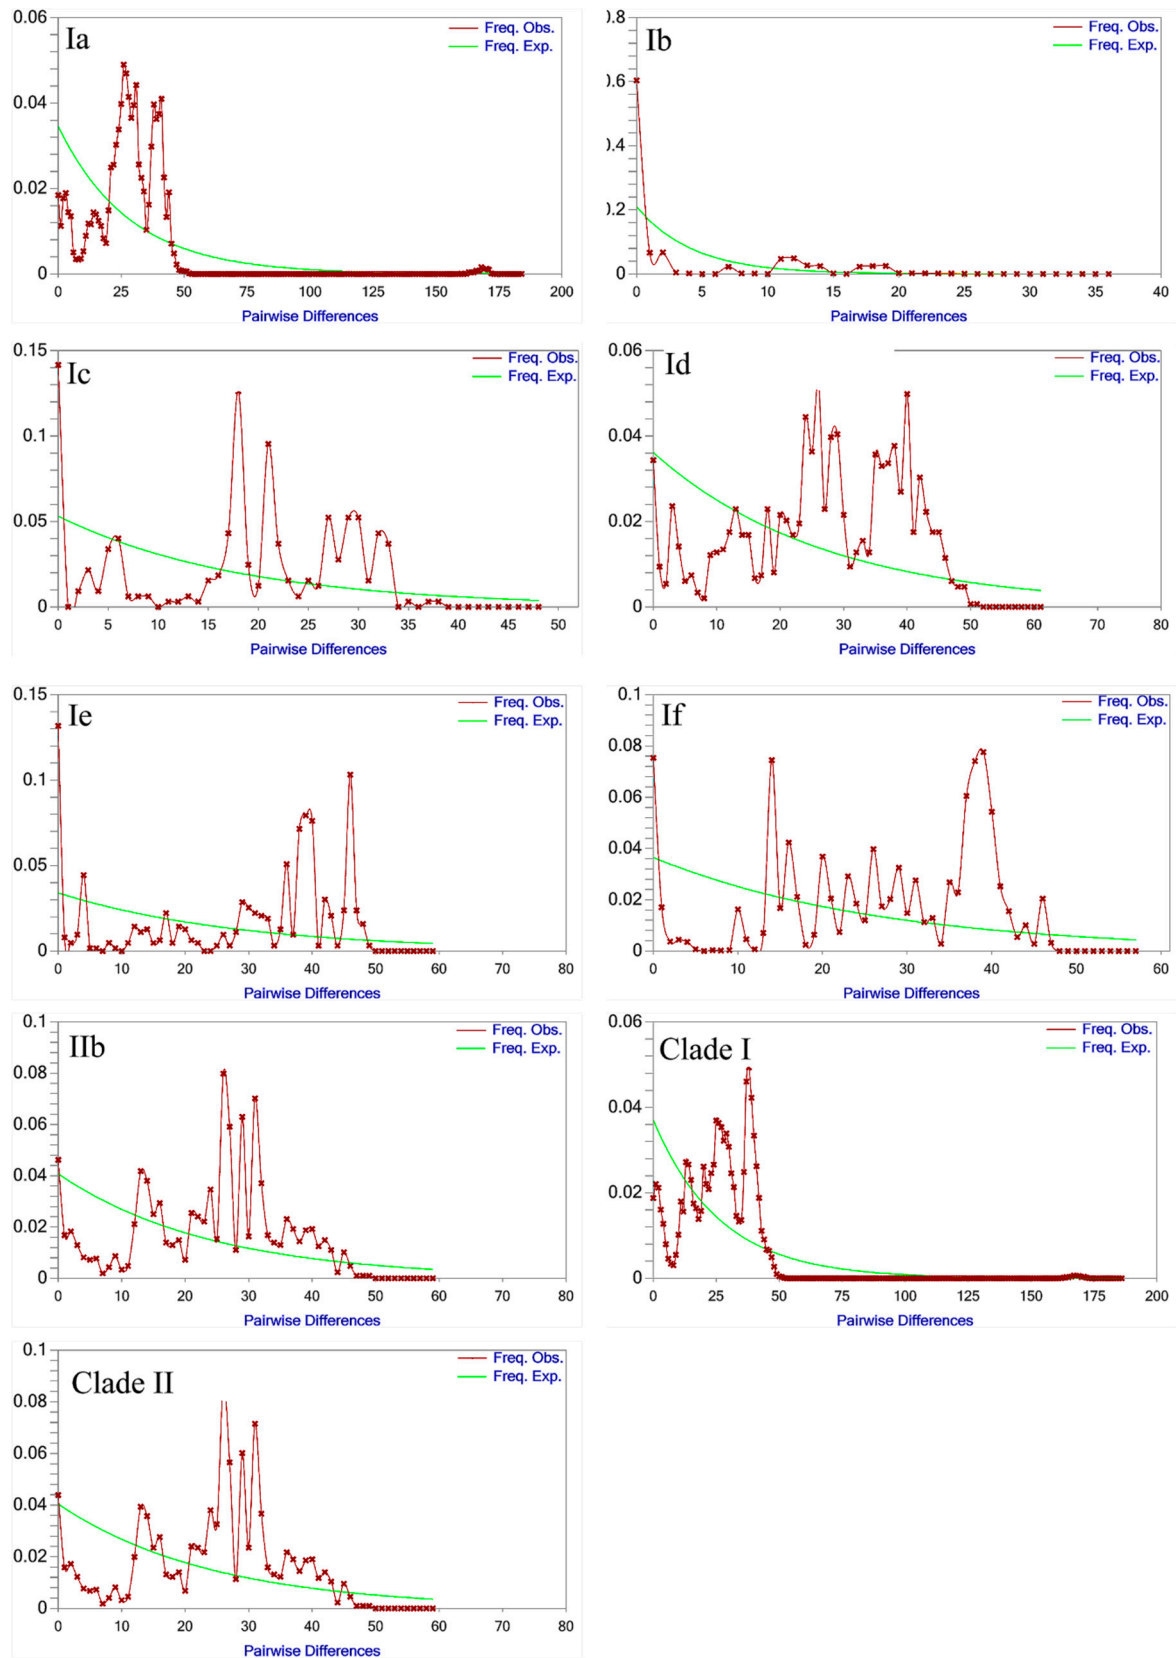

**Figure S3.** Mismatch distributions (MD) analysis for several subclades of *Eremias argus*. The green line corresponds to the expected frequencies of sudden population expansion, while the red line corresponds to the observed values.

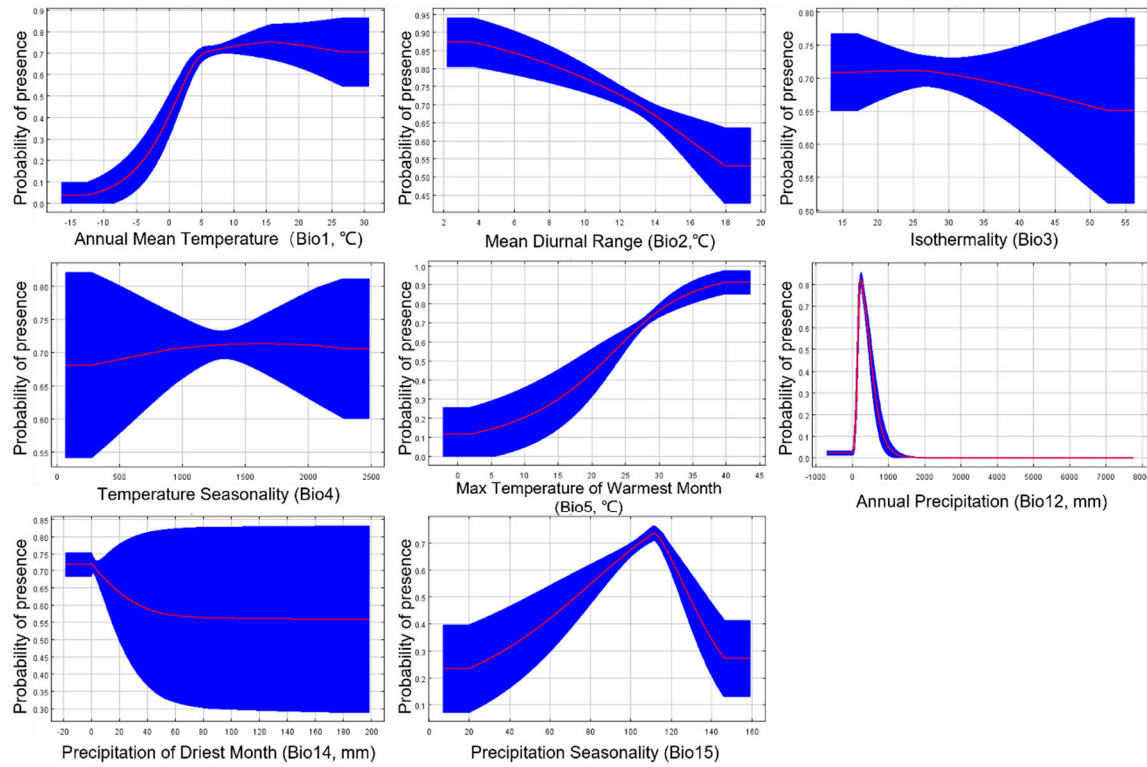

**Figure S4.** Response curves for each environmental variable from WorldClim in ENM when set all other environmental variables at their average sample value. The curves show the mean response of the 100 replicate Maxent runs (red) and the mean  $\pm$  one standard deviation (blue).

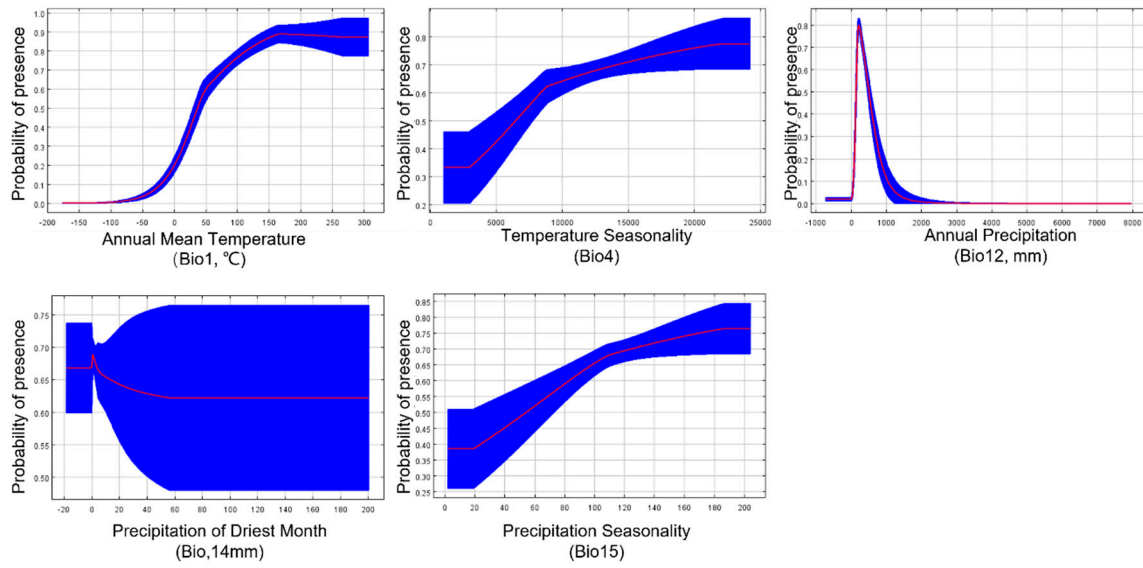

**Figure S5.** Response curves for each environmental variable from PaleoClim in ENM when set all other environmental variables at their average sample value. The curves show the mean response of the 100 replicate Maxent runs (red) and the mean  $\pm$  one standard deviation (blue).

**Table S1** Samples information and corresponded haplotype numbers of *Eremias argus* used for phylogenetic analysis in this study.

| Subspecies               | Sample number | Haplotype | Subclade | Latitude<br>(N) | Longitude<br>(E) | Country | Geographical origin                                             | GenBank<br>accession no. |
|--------------------------|---------------|-----------|----------|-----------------|------------------|---------|-----------------------------------------------------------------|--------------------------|
| <i>E. argus argus</i>    | EA2_CZ1       | Hap102    | Ia       | 32.3            | 118.3            | China   | Chuzhou City, Anhui                                             | HM120774                 |
| <i>E. argus argus</i>    | EA2_CZ2       | Hap102    | Ia       | 32.3            | 118.3            | China   | Chuzhou City, Anhui                                             | HM120774                 |
| <i>E. argus argus</i>    | EA2_CZ3       | Hap102    | Ia       | 32.3            | 118.3            | China   | Chuzhou City, Anhui                                             | HM120775                 |
| <i>E. argus argus</i>    | EA2_CZ4       | Hap102    | Ia       | 32.3            | 118.3            | China   | Chuzhou City, Anhui                                             | HM120776                 |
| <i>E. argus argus</i>    | EA2_CZ5       | Hap102    | Ia       | 32.3            | 118.3            | China   | Chuzhou City, Anhui                                             | HM120776                 |
| <i>E. argus argus</i>    | EA3_CZ6       | Hap103    | Id       | 32.3            | 118.3            | China   | Chuzhou City, Anhui                                             | HM120763                 |
| <i>E. argus argus</i>    | EA42_CZ7      | Hap139    | Id       | 32.3            | 118.3            | China   | Chuzhou City, Anhui                                             | HM120776                 |
| <i>E. argus argus</i>    | EA42_CZ8      | Hap139    | Id       | 32.3            | 118.3            | China   | Chuzhou City, Anhui                                             | HM120784                 |
| <i>E. argus argus</i>    | EA42_CZ9      | Hap139    | Id       | 32.3            | 118.3            | China   | Chuzhou City, Anhui                                             | HM120763                 |
| <i>E. argus argus</i>    | EA42_CZ10     | Hap139    | Id       | 32.3            | 118.3            | China   | Chuzhou City, Anhui                                             | HM120763                 |
| <i>E. argus argus</i>    | EA42_CZ11     | Hap139    | Id       | 32.3            | 118.3            | China   | Chuzhou City, Anhui                                             | HM120763                 |
| <i>E. argus argus</i>    | EA43_CZ12     | Hap140    | Id       | 32.3            | 118.3            | China   | Chuzhou City, Anhui                                             | HM120763                 |
| <i>E. argus argus</i>    | EA44_CZ13     | Hap141    | Id       | 32.3            | 118.3            | China   | Chuzhou City, Anhui                                             | HM120774                 |
| <i>E. argus argus</i>    | Guo1858       | Hap82     | If       | 33.01           | 112.52           | China   | Funiushan Mountain National Nature Reserve, Nanyang City, Henan | OR019270                 |
| <i>E. argus argus</i>    | Guo1859       | Hap82     | If       | 33.01           | 112.52           | China   | Funiushan Mountain National Nature Reserve, Nanyang City, Henan | OR019271                 |
| <i>E. argus barbouri</i> | Guo1532       | Hap72     | If       | 33.98           | 108.83           | China   | Zhuxiping village, Xi'an City, Shaanxi                          | OR019207                 |
| <i>E. argus barbouri</i> | Guo1496       | Hap71     | Ia       | 33.99           | 108.84           | China   | Liyuanping village, Xi'an City, Shaanxi                         | OR019186                 |
| <i>E. argus barbouri</i> | Guo1497       | Hap71     | Ia       | 33.99           | 108.84           | China   | Liyuanping village, Xi'an City, Shaanxi                         | OR019187                 |
| <i>E. argus barbouri</i> | Guo1502       | Hap71     | Ia       | 33.99           | 108.84           | China   | Liyuanping village, Xi'an City, Shaanxi                         | OR019190                 |
| <i>E. argus barbouri</i> | Guo1503       | Hap71     | Ia       | 33.99           | 108.84           | China   | Liyuanping village, Xi'an City, Shaanxi                         | OR019191                 |
| <i>E. argus barbouri</i> | Guo1506       | Hap71     | Ia       | 33.99           | 108.84           | China   | Liyuanping village, Xi'an City, Shaanxi                         | OR019192                 |
| <i>E. argus barbouri</i> | Guo1508       | Hap71     | Ia       | 33.99           | 108.84           | China   | Liyuanping village, Xi'an City, Shaanxi                         | OR019194                 |

|                          |           |        |     |       |        |       |                                         |          |
|--------------------------|-----------|--------|-----|-------|--------|-------|-----------------------------------------|----------|
| <i>E. argus barbouri</i> | Guo1509   | Hap71  | Ia  | 33.99 | 108.84 | China | Liyuanping village, Xi'an City, Shaanxi | OR019195 |
| <i>E. argus barbouri</i> | Guo1510   | Hap71  | Ia  | 33.99 | 108.84 | China | Liyuanping village, Xi'an City, Shaanxi | OR019196 |
| <i>E. argus barbouri</i> | Guo1511   | Hap71  | Ia  | 33.99 | 108.84 | China | Liyuanping village, Xi'an City, Shaanxi | OR019197 |
| <i>E. argus barbouri</i> | Guo1514   | Hap71  | Ia  | 33.99 | 108.84 | China | Liyuanping village, Xi'an City, Shaanxi | OR019200 |
| <i>E. argus barbouri</i> | Guo1519   | Hap71  | Ia  | 33.99 | 108.84 | China | Liyuanping village, Xi'an City, Shaanxi | OR019204 |
| <i>E. argus barbouri</i> | Guo1600   | Hap71  | Ia  | 33.99 | 108.84 | China | Liyuanping village, Xi'an City, Shaanxi | OR019217 |
| <i>E. argus barbouri</i> | Guo1513   | Hap74  | Ia  | 33.99 | 108.84 | China | Liyuanping village, Xi'an City, Shaanxi | OR019199 |
| <i>E. argus barbouri</i> | Guo1515   | Hap75  | Ia  | 33.99 | 108.84 | China | Liyuanping village, Xi'an City, Shaanxi | OR019201 |
| <i>E. argus barbouri</i> | Guo1602   | Hap81  | Ic  | 33.99 | 108.84 | China | Liyuanping village, Xi'an City, Shaanxi | OR019218 |
| <i>E. argus barbouri</i> | Guo1498   | Hap72  | If  | 33.99 | 108.84 | China | Liyuanping village, Xi'an City, Shaanxi | OR019188 |
| <i>E. argus barbouri</i> | Guo1500   | Hap72  | If  | 33.99 | 108.84 | China | Liyuanping village, Xi'an City, Shaanxi | OR019189 |
| <i>E. argus barbouri</i> | Guo1507   | Hap72  | If  | 33.99 | 108.84 | China | Liyuanping village, Xi'an City, Shaanxi | OR019193 |
| <i>E. argus barbouri</i> | Guo1512   | Hap72  | If  | 33.99 | 108.84 | China | Liyuanping village, Xi'an City, Shaanxi | OR019198 |
| <i>E. argus barbouri</i> | Guo1517   | Hap72  | If  | 33.99 | 108.84 | China | Liyuanping village, Xi'an City, Shaanxi | OR019202 |
| <i>E. argus barbouri</i> | Guo1520   | Hap72  | If  | 33.99 | 108.84 | China | Liyuanping village, Xi'an City, Shaanxi | OR019205 |
| <i>E. argus barbouri</i> | Guo1518   | Hap73  | If  | 33.99 | 108.84 | China | Liyuanping village, Xi'an City, Shaanxi | OR019203 |
| <i>E. argus barbouri</i> | EA4_CA1   | Hap104 | IIb | 34    | 108.9  | China | Chang'an District, Xi'an City, Shaanxi  | HM120774 |
| <i>E. argus barbouri</i> | EA4_CA2   | Hap104 | IIb | 34    | 108.9  | China | Chang'an District, Xi'an City, Shaanxi  | HM120775 |
| <i>E. argus barbouri</i> | EA5_CA3   | Hap105 | IIb | 34    | 108.9  | China | Chang'an District, Xi'an City, Shaanxi  | HM120776 |
| <i>E. argus barbouri</i> | EA6_CA4   | Hap106 | IIb | 34    | 108.9  | China | Chang'an District, Xi'an City, Shaanxi  | HM120761 |
| <i>E. argus barbouri</i> | EA6_CA5   | Hap106 | IIb | 34    | 108.9  | China | Chang'an District, Xi'an City, Shaanxi  | HM120761 |
| <i>E. argus barbouri</i> | EA6_CA6   | Hap106 | IIb | 34    | 108.9  | China | Chang'an District, Xi'an City, Shaanxi  | HM120761 |
| <i>E. argus barbouri</i> | EA6_CA7   | Hap106 | IIb | 34    | 108.9  | China | Chang'an District, Xi'an City, Shaanxi  | HM120761 |
| <i>E. argus barbouri</i> | EA6_CA8   | Hap106 | IIb | 34    | 108.9  | China | Chang'an District, Xi'an City, Shaanxi  | HM120761 |
| <i>E. argus barbouri</i> | EA23_CA9  | Hap123 | Ia  | 34    | 108.9  | China | Chang'an District, Xi'an City, Shaanxi  | HM120761 |
| <i>E. argus barbouri</i> | EA23_CA10 | Hap123 | Ia  | 34    | 108.9  | China | Chang'an District, Xi'an City, Shaanxi  | HM120761 |
| <i>E. argus barbouri</i> | EA52_CA11 | Hap148 | Id  | 34    | 108.9  | China | Chang'an District, Xi'an City, Shaanxi  | HM120761 |

|                          |           |        |    |       |        |       |                                            |          |
|--------------------------|-----------|--------|----|-------|--------|-------|--------------------------------------------|----------|
| <i>E. argus barbouri</i> | EA53_CA12 | Hap149 | Id | 34    | 108.9  | China | Chang'an District, Xi'an City, Shaanxi     | HM120761 |
| <i>E. argus argus</i>    | Guo789    | Hap46  | Ia | 34.61 | 114.26 | China | Zhuxian Town, Kaifeng City, Henan          | OR019330 |
| <i>E. argus argus</i>    | Guo794    | Hap48  | Ia | 34.61 | 114.26 | China | Zhuxian Town, Kaifeng City, Henan          | OR019335 |
| <i>E. argus argus</i>    | Guo795    | Hap49  | Ia | 34.61 | 114.26 | China | Zhuxian Town, Kaifeng City, Henan          | OR019336 |
| <i>E. argus argus</i>    | Guo792    | Hap45  | Ib | 34.61 | 114.26 | China | Zhuxian Town, Kaifeng City, Henan          | OR019333 |
| <i>E. argus argus</i>    | Guo796    | Hap50  | Ib | 34.61 | 114.26 | China | Zhuxian Town, Kaifeng City, Henan          | OR019337 |
| <i>E. argus argus</i>    | Guo788    | Hap45  | Ib | 34.61 | 114.26 | China | Zhuxian Town, Kaifeng City, Henan          | OR019329 |
| <i>E. argus argus</i>    | Guo787    | Hap42  | If | 34.61 | 114.26 | China | Zhuxian Town, Kaifeng City, Henan          | OR019328 |
| <i>E. argus argus</i>    | Guo793    | Hap42  | If | 34.61 | 114.26 | China | Zhuxian Town, Kaifeng City, Henan          | OR019334 |
| <i>E. argus argus</i>    | Guo797    | Hap42  | If | 34.61 | 114.26 | China | Zhuxian Town, Kaifeng City, Henan          | OR019338 |
| <i>E. argus barbouri</i> | Guo800    | Hap42  | If | 34.61 | 114.26 | China | Zhuxian Town, Kaifeng City, Henan          | OR019341 |
| <i>E. argus barbouri</i> | Guo801    | Hap42  | If | 34.61 | 114.26 | China | Zhuxian Town, Kaifeng City, Henan          | OR019342 |
| <i>E. argus barbouri</i> | Guo799    | Hap43  | If | 34.61 | 114.26 | China | Zhuxian Town, Kaifeng City, Henan          | OR019340 |
| <i>E. argus argus</i>    | Guo790    | Hap47  | If | 34.61 | 114.26 | China | Zhuxian Town, Kaifeng City, Henan          | OR019332 |
| <i>E. argus barbouri</i> | Guo798    | Hap51  | If | 34.61 | 114.26 | China | Zhuxian Town, Kaifeng City, Henan          | OR019339 |
| <i>E. argus barbouri</i> | Guo802    | Hap52  | If | 34.61 | 114.26 | China | Zhuxian Town, Kaifeng City, Henan          | OR019343 |
| <i>E. argus argus</i>    | Guo804    | Hap53  | If | 34.61 | 114.26 | China | Zhuxian Town, Kaifeng City, Henan          | OR019344 |
| <i>E. argus barbouri</i> | Guo805    | Hap54  | If | 34.61 | 114.26 | China | Zhuxian Town, Kaifeng City, Henan          | OR019345 |
| <i>E. argus barbouri</i> | Guo806    | Hap54  | If | 34.61 | 114.26 | China | Zhuxian Town, Kaifeng City, Henan          | OR019346 |
| <i>E. argus barbouri</i> | Guo782E   | Hap42  | If | 34.81 | 114.37 | China | Henan University, Kaifeng City, Henan      | OR019324 |
| <i>E. argus barbouri</i> | Guo783    | Hap43  | If | 34.72 | 115.2  | China | Minquan Forest Farm, Shangqiu City , Henan | OR019325 |
| <i>E. argus argus</i>    | Guo785    | Hap42  | If | 34.72 | 115.2  | China | Minquan Forest Farm, Shangqiu City, Henan  | OR019326 |
| <i>E. argus argus</i>    | Guo786    | Hap44  | Ia | 34.72 | 115.2  | China | Minquan Forest Farm, Shangqiu City, Henan  | OR019327 |
| <i>E. argus barbouri</i> | EA1_JY1   | Hap101 | Ia | 35.1  | 112.6  | China | Jiyuan City, Henan                         | HM120763 |
| <i>E. argus barbouri</i> | EA1_JY2   | Hap101 | Ia | 35.1  | 112.6  | China | Jiyuan City, Henan                         | HM120763 |
| <i>E. argus barbouri</i> | EA1_JY3   | Hap101 | Ia | 35.1  | 112.6  | China | Jiyuan City, Henan                         | HM120763 |
| <i>E. argus barbouri</i> | EA1_JY4   | Hap101 | Ia | 35.1  | 112.6  | China | Jiyuan City, Henan                         | HM120763 |



|                          |           |        |     |       |        |       |                                          |          |
|--------------------------|-----------|--------|-----|-------|--------|-------|------------------------------------------|----------|
| <i>E. argus barbouri</i> | EA1_JY5   | Hap101 | Ia  | 35.1  | 112.6  | China | Jiyuan City, Henan                       | HM120763 |
| <i>E. argus argus</i>    | EA13_JY6  | Hap113 | Ic  | 35.1  | 112.6  | China | Jiyuan City, Henan                       | HM120771 |
| <i>E. argus argus</i>    | EA13_JY7  | Hap113 | Ic  | 35.1  | 112.6  | China | Jiyuan City, Henan                       | HM120771 |
| <i>E. argus argus</i>    | EA14_JY8  | Hap114 | Ic  | 35.1  | 112.6  | China | Jiyuan City, Henan                       | HM120772 |
| <i>E. argus argus</i>    | EA15_JY9  | Hap115 | IIb | 35.1  | 112.6  | China | Jiyuan City, Henan                       | HM120772 |
| <i>E. argus argus</i>    | EA15_JY10 | Hap115 | IIb | 35.1  | 112.6  | China | Jiyuan City, Henan                       | HM120773 |
| <i>E. argus argus</i>    | EA25_JY11 | Hap125 | Ic  | 35.1  | 112.6  | China | Jiyuan City, Henan                       | HM120773 |
| <i>E. argus barbouri</i> | Guo672    | Hap41  | Ia  | 35.97 | 104.17 | China | Taipingpu village, Yuzhong County, Gansu | OR019313 |
| <i>E. argus barbouri</i> | Guo2663   | Hap277 | Ia  | 36.1  | 103.79 | China | Jiuzhoutai, Lanzhou City, Gansu          | OR019281 |
| <i>E. argus barbouri</i> | Guo2679   | Hap278 | Ia  | 36.1  | 103.79 | China | Jiuzhoutai, Lanzhou City, Gansu          | OR019282 |
| <i>E. argus argus</i>    | Guo2689   | Hap277 | Ia  | 36.1  | 103.79 | China | Jiuzhoutai, Lanzhou City, Gansu          | OR019285 |
| <i>E. argus barbouri</i> | Guo2788   | Hap277 | Ia  | 36.1  | 103.79 | China | Jiuzhoutai, Lanzhou City, Gansu          | OR019284 |
| <i>E. argus argus</i>    | Guo2790   | Hap277 | Ia  | 36.1  | 103.79 | China | Jiuzhoutai, Lanzhou City, Gansu          | OR019286 |
| <i>E. argus barbouri</i> | Guo1565   | Hap76  | Ia  | 36.1  | 103.79 | China | Jiuzhoutai, Lanzhou City, Gansu          | OR019208 |
| <i>E. argus barbouri</i> | Guo1697   | Hap280 | Ia  | 36.1  | 103.79 | China | Jiuzhoutai, Lanzhou City, Gansu          | OR019230 |
| <i>E. argus barbouri</i> | Guo1691   | Hap282 | Ia  | 36.1  | 103.79 | China | Jiuzhoutai, Lanzhou City, Gansu          | OR019228 |
| <i>E. argus barbouri</i> | Guo1692   | Hap71  | Ia  | 36.1  | 103.79 | China | Jiuzhoutai, Lanzhou City, Gansu          | OR019229 |
| <i>E. argus barbouri</i> | Guo1796   | Hap279 | Ia  | 36.1  | 103.79 | China | Jiuzhoutai, Lanzhou City, Gansu          | OR019231 |
| <i>E. argus barbouri</i> | GXG2601   | Hap274 | Ia  | 36.12 | 111.07 | China | Shiyao village, Xiangning County, Shanxi | OR019576 |
| <i>E. argus barbouri</i> | GXG2602   | Hap275 | Ia  | 36.12 | 111.07 | China | Shiyao village, Xiangning County, Shanxi | OR019577 |
| <i>E. argus barbouri</i> | GXG2603   | Hap276 | Ia  | 36.12 | 111.07 | China | Shiyao village, Xiangning County, Shanxi | OR019578 |
| <i>E. argus barbouri</i> | Guo5170   | Hap266 | Ia  | 36.28 | 100.35 | China | Shazhuyu village, Gonghe County, Qinghai | OR019298 |
| <i>E. argus barbouri</i> | Guo5171   | Hap267 | Ia  | 36.28 | 100.35 | China | Shazhuyu village, Gonghe County, Qinghai | OR019299 |
| <i>E. argus barbouri</i> | Guo5173   | Hap268 | Ia  | 36.28 | 100.35 | China | Shazhuyu village, Gonghe County, Qinghai | OR019301 |
| <i>E. argus barbouri</i> | Guo5174   | Hap269 | Ia  | 36.28 | 100.35 | China | Shazhuyu village, Gonghe County, Qinghai | OR019302 |
| <i>E. argus barbouri</i> | Guo5178   | Hap272 | Ia  | 36.28 | 100.35 | China | Shazhuyu village, Gonghe County, Qinghai | OR019306 |
| <i>E. argus barbouri</i> | Guo5179   | Hap273 | Ia  | 36.28 | 100.35 | China | Shazhuyu village, Gonghe County, Qinghai | OR019307 |

|                          |           |        |    |       |        |       |                                                                    |          |
|--------------------------|-----------|--------|----|-------|--------|-------|--------------------------------------------------------------------|----------|
| <i>E. argus barbouri</i> | Guo5181   | Hap269 | Ia | 36.28 | 100.35 | China | Shazhuyu village, Gonghe County, Qinghai                           | OR019309 |
| <i>E. argus barbouri</i> | Guo5182   | Hap273 | Ia | 36.28 | 100.35 | China | Shazhuyu village, Gonghe County, Qinghai                           | OR019310 |
| <i>E. argus barbouri</i> | GE0708047 | Hap29  | Ia | 36.28 | 100.35 | China | Shazhuyu village, Gonghe County, Qinghai                           | OR019147 |
| <i>E. argus barbouri</i> | Guo5176   | Hap270 | Ic | 36.28 | 100.35 | China | Shazhuyu village, Gonghe County, Qinghai                           | OR019304 |
| <i>E. argus barbouri</i> | Guo5177   | Hap271 | Ic | 36.28 | 100.35 | China | Shazhuyu village, Gonghe County, Qinghai                           | OR019305 |
| <i>E. argus barbouri</i> | GE0708039 | Hap28  | If | 36.28 | 100.35 | China | Shazhuyu village, Gonghe County, Qinghai                           | OR019145 |
| <i>E. argus barbouri</i> | GE0708046 | Hap28  | If | 36.28 | 100.35 | China | Shazhuyu village, Gonghe County, Qinghai                           | OR019146 |
| <i>E. argus barbouri</i> | Guo5172   | Hap28  | If | 36.28 | 100.35 | China | Shazhuyu village, Gonghe County, Qinghai                           | OR019300 |
| <i>E. argus barbouri</i> | Guo5175   | Hap28  | If | 36.28 | 100.35 | China | Shazhuyu village, Gonghe County, Qinghai                           | OR019303 |
| <i>E. argus barbouri</i> | Guo5180   | Hap28  | If | 36.28 | 100.35 | China | Shazhuyu village, Gonghe County, Qinghai                           | OR019308 |
| <i>E. argus barbouri</i> | EA29_GH1  | Hap129 | Ia | 36.4  | 100.5  | China | Gonghe County, Qinghai                                             | HM120802 |
| <i>E. argus barbouri</i> | EA30_GH2  | Hap130 | Ia | 36.4  | 100.5  | China | Gonghe County, Qinghai                                             | HM120803 |
| <i>E. argus barbouri</i> | EA31_GH3  | Hap28  | If | 36.4  | 100.5  | China | Gonghe County, Qinghai                                             | HM120804 |
| <i>E. argus barbouri</i> | EA32_GH4  | Hap131 | Ia | 36.4  | 100.5  | China | Gonghe County, Qinghai                                             | HM120767 |
| <i>E. argus barbouri</i> | EA32_GH5  | Hap131 | Ia | 36.4  | 100.5  | China | Gonghe County, Qinghai                                             | HM120767 |
| <i>E. argus barbouri</i> | EA32_GH6  | Hap131 | Ia | 36.4  | 100.5  | China | Gonghe County, Qinghai                                             | HM120767 |
| <i>E. argus barbouri</i> | EA32_GH7  | Hap131 | Ia | 36.4  | 100.5  | China | Gonghe County, Qinghai                                             | HM120767 |
| <i>E. argus barbouri</i> | EA32_GH8  | Hap131 | Ia | 36.4  | 100.5  | China | Gonghe County, Qinghai                                             | HM120813 |
| <i>E. argus barbouri</i> | EA32_GH9  | Hap131 | Ia | 36.4  | 100.5  | China | Gonghe County, Qinghai                                             | HM120812 |
| <i>E. argus barbouri</i> | EA32_GH10 | Hap131 | Ia | 36.4  | 100.5  | China | Gonghe County, Qinghai                                             | HM120766 |
| <i>E. argus barbouri</i> | EA32_GH11 | Hap131 | Ia | 36.4  | 100.5  | China | Gonghe County, Qinghai                                             | HM120766 |
| <i>E. argus argus</i>    | MMS2628   | Hap100 | Ic | 36.44 | 126.36 | Korea | Unyeo Beach, Janggok-ri, Gonam-myeon, Taean-gun, Chungcheongnam-do | OR019603 |
| <i>E. argus argus</i>    | MMS2629   | Hap100 | Ic | 36.44 | 126.36 | Korea | Unyeo Beach, Janggok-ri, Gonam-myeon, Taean-gun, Chungcheongnam-do | OR019605 |
| <i>E. argus argus</i>    | MMS2630   | Hap100 | Ic | 36.44 | 126.36 | Korea | Unyeo Beach, Janggok-ri, Gonam-myeon, Taean-gun, Chungcheongnam-do | OR019606 |

|                          |           |        |     |       |        |       |                                                                    |          |
|--------------------------|-----------|--------|-----|-------|--------|-------|--------------------------------------------------------------------|----------|
| <i>E. argus argus</i>    | MMS2631   | Hap100 | Ic  | 36.44 | 126.36 | Korea | Unyeo Beach, Janggok-ri, Gonam-myeon, Taean-gun, Chungcheongnam-do | OR019607 |
| <i>E. argus argus</i>    | MMS2632   | Hap100 | Ic  | 36.44 | 126.36 | Korea | Unyeo Beach, Janggok-ri, Gonam-myeon, Taean-gun, Chungcheongnam-do | OR019608 |
| <i>E. argus argus</i>    | MMS2406   | Hap100 | Ic  | 36.64 | 126.3  | Korea | Dalsanpo Beach, Dalsan-ri, Nam-myeon, Taean-gun, Chungcheongnam-do | OR019609 |
| <i>E. argus argus</i>    | MMS2407   | Hap100 | Ic  | 36.64 | 126.3  | Korea | Dalsanpo Beach, Dalsan-ri, Nam-myeon, Taean-gun, Chungcheongnam-do | OR019610 |
| <i>E. argus argus</i>    | MMS2408   | Hap100 | Ic  | 36.64 | 126.3  | Korea | Dalsanpo Beach, Dalsan-ri, Nam-myeon, Taean-gun, Chungcheongnam-do | OR019611 |
| <i>E. argus argus</i>    | MMS2409   | Hap100 | Ic  | 36.64 | 126.3  | Korea | Dalsanpo Beach, Dalsan-ri, Nam-myeon, Taean-gun, Chungcheongnam-do | OR019612 |
| <i>E. argus argus</i>    | MMS2410   | Hap100 | Ic  | 36.64 | 126.3  | Korea | Dalsanpo Beach, Dalsan-ri, Nam-myeon, Taean-gun, Chungcheongnam-do | OR019604 |
| <i>E. argus barbouri</i> | Guo2654   | Hap84  | Ic  | 36.53 | 102.02 | China | Caojiapu village, Huzhu County, Qinghai                            | OR019280 |
| <i>E. argus argus</i>    | EA8_HD1   | Hap108 | IIb | 36.6  | 114.5  | China | Handan City, Hebei                                                 | HM120762 |
| <i>E. argus argus</i>    | EA9_HD2   | Hap109 | IIb | 36.6  | 114.5  | China | Handan City, Hebei                                                 | HM120762 |
| <i>E. argus argus</i>    | EA10_HD3  | Hap110 | IIb | 36.6  | 114.5  | China | Handan City, Hebei                                                 | HM120791 |
| <i>E. argus argus</i>    | EA11_HD4  | Hap111 | Ia  | 36.6  | 114.5  | China | Handan City, Hebei                                                 | HM120791 |
| <i>E. argus argus</i>    | EA12_HD5  | Hap112 | Ia  | 36.6  | 114.5  | China | Handan City, Hebei                                                 | HM120798 |
| <i>E. argus argus</i>    | EA22_HD6  | Hap122 | Id  | 36.6  | 114.5  | China | Handan City, Hebei                                                 | HM120798 |
| <i>E. argus argus</i>    | EA24_HD7  | Hap124 | Ic  | 36.6  | 114.5  | China | Handan City, Hebei                                                 | HM120798 |
| <i>E. argus argus</i>    | EA26_HD8  | Hap126 | Ia  | 36.6  | 114.5  | China | Handan City, Hebei                                                 | HM120798 |
| <i>E. argus argus</i>    | EA26_HD9  | Hap126 | Ia  | 36.6  | 114.5  | China | Handan City, Hebei                                                 | HM120798 |
| <i>E. argus argus</i>    | EA26_HD10 | Hap126 | Ia  | 36.6  | 114.5  | China | Handan City, Hebei                                                 | HM120798 |
| <i>E. argus argus</i>    | EA26_HD11 | Hap126 | Ia  | 36.6  | 114.5  | China | Handan City, Hebei                                                 | HM120799 |
| <i>E. argus argus</i>    | EA27_HD12 | Hap127 | Ia  | 36.6  | 114.5  | China | Handan City, Hebei                                                 | HM120799 |

|                          |          |        |     |       |        |       |                                                              |          |
|--------------------------|----------|--------|-----|-------|--------|-------|--------------------------------------------------------------|----------|
| <i>E. argus barbouri</i> | Guo1592  | Hap62  | If  | 36.71 | 110.42 | China | Nianpan village, Yanchuan County, Shaanxi                    | OR019211 |
| <i>E. argus barbouri</i> | Guo1440  | Hap63  | Ic  | 36.71 | 110.42 | China | Nianpan village, Yanchuan County, Shaanxi                    | OR019169 |
| <i>E. argus barbouri</i> | Guo1442  | Hap64  | Ie  | 36.71 | 110.42 | China | Nianpan village, Yanchuan County, Shaanxi                    | OR019170 |
| <i>E. argus barbouri</i> | Guo1593  | Hap77  | Ie  | 36.71 | 110.42 | China | Nianpan village, Yanchuan County, Shaanxi                    | OR019212 |
| <i>E. argus barbouri</i> | Guo1594  | Hap78  | Ie  | 36.71 | 110.42 | China | Nianpan village, Yanchuan County, Shaanxi                    | OR019213 |
| <i>E. argus barbouri</i> | Guo1598  | Hap79  | Ie  | 36.71 | 110.42 | China | Nianpan village, Yanchuan County, Shaanxi                    | OR019215 |
| <i>E. argus barbouri</i> | Guo1599  | Hap80  | Ie  | 36.71 | 110.42 | China | Nianpan village, Yanchuan County, Shaanxi                    | OR019216 |
| <i>E. argus barbouri</i> | Guo1439  | Hap62  | If  | 36.71 | 110.42 | China | Nianpan village, Yanchuan County, Shaanxi                    | OR019168 |
| <i>E. argus argus</i>    | SJS03    | Hap160 | IIb | 36.84 | 121.7  | China | Yintan district, Weihai City, Shandong                       | OR019601 |
| <i>E. argus argus</i>    | SJS04    | Hap160 | IIb | 36.84 | 121.7  | China | Yintan district, Weihai City, Shandong                       | OR019602 |
| <i>E. argus barbouri</i> | Guo8895  | Hap71  | Ia  | 36.88 | 103.81 | China | Dongjing village, Jingtai County, Gansu                      | OR019350 |
| <i>E. argus barbouri</i> | Guo8896  | Hap71  | Ia  | 36.88 | 103.81 | China | Dongjing village, Jingtai County, Gansu                      | OR019351 |
| <i>E. argus barbouri</i> | Guo8897  | Hap87  | Ia  | 36.88 | 103.81 | China | Dongjing village, Jingtai County, Gansu                      | OR019352 |
| <i>E. argus barbouri</i> | Guo8898  | Hap71  | Ia  | 36.88 | 103.81 | China | Dongjing village, Jingtai County, Gansu                      | OR019353 |
| <i>E. argus barbouri</i> | Guo8899  | Hap71  | Ia  | 36.88 | 103.81 | China | Dongjing village, Jingtai County, Gansu                      | OR019354 |
| <i>E. argus barbouri</i> | Guo8900  | Hap71  | Ia  | 36.88 | 103.81 | China | Dongjing village, Jingtai County, Gansu                      | OR019355 |
| <i>E. argus barbouri</i> | Guo8901  | Hap71  | Ia  | 36.88 | 103.81 | China | Dongjing village, Jingtai County, Gansu                      | OR019357 |
| <i>E. argus barbouri</i> | Guo8902  | Hap71  | Ia  | 36.88 | 103.81 | China | Dongjing village, Jingtai County, Gansu                      | OR019358 |
| <i>E. argus barbouri</i> | Guo8955  | Hap89  | Ia  | 37.44 | 106.43 | China | Tianyuan village, Hongsipu district, Wuzhong City, Ningxia   | OR019361 |
| <i>E. argus barbouri</i> | Guo8949  | Hap88  | Ic  | 37.45 | 106.17 | China | Tianshuihe village, Hongsipu district, Wuzhong City, Ningxia | OR019360 |
| <i>E. argus argus</i>    | ZYCA006  | Hap1   | Ia  | 37.72 | 114.77 | China | Dashiqiao village, Zhaoxian County, Hebei                    | OR019623 |
| <i>E. argus argus</i>    | ZYCA007  | Hap2   | Ib  | 37.72 | 114.77 | China | Dashiqiao village, Zhaoxian County, Hebei                    | OR019624 |
| <i>E. argus argus</i>    | ZYCA008  | Hap3   | Ib  | 37.72 | 114.77 | China | Dashiqiao village, Zhaoxian County, Hebei                    | OR019625 |
| <i>E. argus barbouri</i> | EA18_YQ1 | Hap118 | Ia  | 37.9  | 113.6  | China | Yangquan City, Shanxi                                        | HM120800 |
| <i>E. argus barbouri</i> | EA19_YQ2 | Hap119 | Ib  | 37.9  | 113.6  | China | Yangquan City, Shanxi                                        | HM120800 |
| <i>E. argus barbouri</i> | EA21_YQ3 | Hap121 | Ia  | 37.9  | 113.6  | China | Yangquan City, Shanxi                                        | HM120800 |

|                          |          |        |    |       |        |       |                                      |          |
|--------------------------|----------|--------|----|-------|--------|-------|--------------------------------------|----------|
| <i>E.argus barbouri</i>  | EA21_YQ4 | Hap121 | Ia | 37.9  | 113.6  | China | Yangquan City, Shanxi                | HM120800 |
| <i>E.argus barbouri</i>  | EA21_YQ5 | Hap121 | Ia | 37.9  | 113.6  | China | Yangquan City, Shanxi                | HM120801 |
| <i>E.argus barbouri</i>  | EA21_YQ6 | Hap121 | Ia | 37.9  | 113.6  | China | Yangquan City, Shanxi                | HM120802 |
| <i>E.argus barbouri</i>  | EA35_YQ7 | Hap134 | Ia | 37.9  | 113.6  | China | Yangquan City, Shanxi                | HM120802 |
| <i>E.argus barbouri</i>  | EA36_YQ8 | Hap135 | Ia | 37.9  | 113.6  | China | Yangquan City, Shanxi                | HM120802 |
| <i>E.argus barbouri</i>  | EA37_YQ9 | Hap136 | Ic | 37.9  | 113.6  | China | Yangquan City, Shanxi                | HM120802 |
| <i>E. argus barbouri</i> | Guo1468  | Hap68  | If | 38.17 | 109.78 | China | Dahetan village, Yulin City, Shaanxi | OR019148 |
| <i>E. argus barbouri</i> | Guo1606  | Hap68  | If | 38.17 | 109.78 | China | Dahetan village, Yulin City, Shaanxi | OR019219 |
| <i>E. argus barbouri</i> | Guo1609  | Hap71  | Ia | 38.17 | 109.78 | China | Dahetan village, Yulin City, Shaanxi | OR019222 |
| <i>E. argus barbouri</i> | Guo1610  | Hap71  | Ia | 38.17 | 109.78 | China | Dahetan village, Yulin City, Shaanxi | OR019223 |
| <i>E. argus barbouri</i> | Guo1611  | Hap74  | Ia | 38.17 | 109.78 | China | Dahetan village, Yulin City, Shaanxi | OR019224 |
| <i>E. argus barbouri</i> | Guo1612  | Hap74  | Ia | 38.17 | 109.78 | China | Dahetan village, Yulin City, Shaanxi | OR019225 |
| <i>E. argus barbouri</i> | Guo1614  | Hap71  | Ia | 38.17 | 109.78 | China | Dahetan village, Yulin City, Shaanxi | OR019226 |
| <i>E. argus barbouri</i> | Guo1448  | Hap65  | Ie | 38.17 | 109.78 | China | Dahetan village, Yulin City, Shaanxi | OR019171 |
| <i>E. argus barbouri</i> | Guo1449  | Hap66  | Ie | 38.17 | 109.78 | China | Dahetan village, Yulin City, Shaanxi | OR019172 |
| <i>E. argus barbouri</i> | Guo1451  | Hap66  | Ie | 38.17 | 109.78 | China | Dahetan village, Yulin City, Shaanxi | OR019173 |
| <i>E. argus barbouri</i> | Guo1452  | Hap65  | Ie | 38.17 | 109.78 | China | Dahetan village, Yulin City, Shaanxi | OR019174 |
| <i>E. argus barbouri</i> | Guo1453  | Hap66  | Ie | 38.17 | 109.78 | China | Dahetan village, Yulin City, Shaanxi | OR019175 |
| <i>E. argus barbouri</i> | Guo1454  | Hap66  | Ie | 38.17 | 109.78 | China | Dahetan village, Yulin City, Shaanxi | OR019176 |
| <i>E. argus barbouri</i> | Guo1460  | Hap66  | Ie | 38.17 | 109.78 | China | Dahetan village, Yulin City, Shaanxi | OR019178 |
| <i>E. argus barbouri</i> | Guo1461  | Hap66  | Ie | 38.17 | 109.78 | China | Dahetan village, Yulin City, Shaanxi | OR019179 |
| <i>E. argus barbouri</i> | Guo1471  | Hap66  | Ie | 38.17 | 109.78 | China | Dahetan village, Yulin City, Shaanxi | OR019180 |
| <i>E. argus barbouri</i> | Guo1476  | Hap66  | Ie | 38.17 | 109.78 | China | Dahetan village, Yulin City, Shaanxi | OR019183 |
| <i>E. argus barbouri</i> | Guo1477  | Hap66  | Ie | 38.17 | 109.78 | China | Dahetan village, Yulin City, Shaanxi | OR019184 |
| <i>E. argus barbouri</i> | Guo1522  | Hap66  | Ie | 38.17 | 109.78 | China | Dahetan village, Yulin City, Shaanxi | OR019206 |
| <i>E. argus barbouri</i> | Guo1571  | Hap66  | Ie | 38.17 | 109.78 | China | Dahetan village, Yulin City, Shaanxi | OR019210 |
| <i>E. argus barbouri</i> | Guo1595  | Hap66  | Ie | 38.17 | 109.78 | China | Dahetan village, Yulin City, Shaanxi | OR019214 |

|                          |         |        |      |       |        |       |                                               |          |
|--------------------------|---------|--------|------|-------|--------|-------|-----------------------------------------------|----------|
| <i>E. argus barbouri</i> | Guo1607 | Hap66  | Ie   | 38.17 | 109.78 | China | Dahetan village, Yulin City, Shaanxi          | OR019220 |
| <i>E. argus barbouri</i> | Guo1456 | Hap67  | If   | 38.17 | 109.78 | China | Dahetan village, Yulin City, Shaanxi          | OR019177 |
| <i>E. argus barbouri</i> | Guo1463 | Hap67  | If   | 38.17 | 109.78 | China | Dahetan village, Yulin City, Shaanxi          | OR019626 |
| <i>E. argus barbouri</i> | Guo1473 | Hap69  | If   | 38.17 | 109.78 | China | Dahetan village, Yulin City, Shaanxi          | OR019181 |
| <i>E. argus barbouri</i> | Guo1475 | Hap70  | If   | 38.17 | 109.78 | China | Dahetan village, Yulin City, Shaanxi          | OR019182 |
| <i>E. argus barbouri</i> | Guo1479 | Hap67  | If   | 38.17 | 109.78 | China | Dahetan village, Yulin City, Shaanxi          | OR019185 |
| <i>E. argus barbouri</i> | Guo1570 | Hap69  | If   | 38.17 | 109.78 | China | Dahetan village, Yulin City, Shaanxi          | OR019209 |
| <i>E. argus barbouri</i> | Guo1608 | Hap69  | If   | 38.17 | 109.78 | China | Dahetan village, Yulin City, Shaanxi          | OR019221 |
| <i>E. argus barbouri</i> | Guo1682 | Hap69  | If   | 38.17 | 109.78 | China | Dahetan village, Yulin City, Shaanxi          | OR019227 |
| <i>E. argus barbouri</i> | GXG2309 | Hap224 | Id   | 38.18 | 107.7  | China | Hulagalaji, Otog Front Banner, Inner Mongolia | OR019541 |
| <i>E. argus barbouri</i> | GXG2496 | Hap234 | Id   | 38.23 | 108.23 | China | Taolimu, Otog Front Banner, Inner Mongolia    | OR019558 |
| <i>E. argus barbouri</i> | GXG2501 | Hap235 | Id   | 38.23 | 108.23 | China | Taolimu, Otog Front Banner, Inner Mongolia    | OR019559 |
| <i>E. argus barbouri</i> | GXG2502 | Hap236 | Ia   | 38.23 | 108.23 | China | Taolimu, Otog Front Banner, Inner Mongolia    | OR019560 |
| <i>E. argus barbouri</i> | GXG2323 | Hap225 | IIfb | 38.23 | 108.23 | China | Taolimu, Otog Front Banner, Inner Mongolia    | OR019543 |
| <i>E. argus barbouri</i> | GXG2295 | Hap221 | Ia   | 38.89 | 107.71 | China | Shahuchaidamu, Wushen Banner, Inner Mongolia  | OR019538 |
| <i>E. argus barbouri</i> | GXG2296 | Hap222 | Ia   | 38.89 | 107.71 | China | Shahuchaidamu, Wushen Banner, Inner Mongolia  | OR019539 |
| <i>E. argus barbouri</i> | GXG2297 | Hap223 | Ia   | 38.89 | 107.71 | China | Shahuchaidamu, Wushen Banner, Inner Mongolia  | OR019540 |
| <i>E. argus barbouri</i> | Guo893  | Hap55  | If   | 38.89 | 107.71 | China | Shahuchaidamu, Wushen Banner, Inner Mongolia  | OR019359 |
| <i>E. argus barbouri</i> | GXG2324 | Hap55  | If   | 38.23 | 108.23 | China | Taolimu, Otog Front Banner, Inner Mongolia    | OR019544 |
| <i>E. argus barbouri</i> | GXG2294 | Hap55  | If   | 38.89 | 107.71 | China | Shahuchaidamu, Wushen Banner, Inner Mongolia  | OR019537 |
| <i>E. argus barbouri</i> | GXG2288 | Hap220 | Ia   | 39.1  | 107.27 | China | Saiyinwusu, Otog Banner, Inner Mongolia       | OR019536 |
| <i>E. argus barbouri</i> | GXG2438 | Hap233 | Ia   | 39.1  | 107.27 | China | Saiyinwusu, Otog Banner, Inner Mongolia       | OR019557 |
| <i>E. argus barbouri</i> | GXG2286 | Hap55  | If   | 39.1  | 107.27 | China | Saiyinwusu, Otog Banner, Inner Mongolia       | OR019535 |
| <i>E. argus barbouri</i> | GXG2320 | Hap55  | If   | 39.1  | 107.27 | China | Saiyinwusu, Otog Banner, Inner Mongolia       | OR019542 |
| <i>E. argus barbouri</i> | GXG2327 | Hap221 | Ia   | 39.27 | 108.04 | China | Gekewusu, Otog Banner, Inner Mongolia         | OR019546 |
| <i>E. argus barbouri</i> | GXG2521 | Hap238 | Id   | 39.27 | 108.04 | China | Gekewusu, Otog Banner, Inner Mongolia         | OR019562 |
| <i>E. argus barbouri</i> | GXG2523 | Hap240 | Id   | 39.27 | 108.04 | China | Gekewusu, Otog Banner, Inner Mongolia         | OR019564 |

|                          |            |        |     |       |        |       |                                           |          |
|--------------------------|------------|--------|-----|-------|--------|-------|-------------------------------------------|----------|
| <i>E. argus barbouri</i> | GXG2328    | Hap55  | If  | 39.27 | 108.04 | China | Gekewusu, Otog Banner, Inner Mongolia     | OR019545 |
| <i>E. argus barbouri</i> | GXG2329    | Hap226 | IIb | 39.27 | 108.04 | China | Gekewusu, Otog Banner, Inner Mongolia     | OR019547 |
| <i>E. argus barbouri</i> | GXG2520    | Hap237 | IIb | 39.27 | 108.04 | China | Gekewusu, Otog Banner, Inner Mongolia     | OR019561 |
| <i>E. argus barbouri</i> | GXG2522    | Hap239 | IIb | 39.27 | 108.04 | China | Gekewusu, Otog Banner, Inner Mongolia     | OR019563 |
| <i>E. argus barbouri</i> | EA34_ETK1  | Hap133 | Ia  | 39.5  | 107.5  | China | Otog Banner, Inner Mongolia               | HM120767 |
| <i>E. argus barbouri</i> | EA45_ETK2  | Hap55  | If  | 39.5  | 107.5  | China | Otog Banner, Inner Mongolia               | HM120767 |
| <i>E. argus barbouri</i> | EA45_ETK3  | Hap55  | If  | 39.5  | 107.5  | China | Otog Banner, Inner Mongolia               | HM120767 |
| <i>E. argus barbouri</i> | EA45_ETK4  | Hap55  | If  | 39.5  | 107.5  | China | Otog Banner, Inner Mongolia               | HM120767 |
| <i>E. argus barbouri</i> | EA45_ETK5  | Hap55  | If  | 39.5  | 107.5  | China | Otog Banner, Inner Mongolia               | HM120767 |
| <i>E. argus barbouri</i> | EA45_ETK6  | Hap55  | If  | 39.5  | 107.5  | China | Otog Banner, Inner Mongolia               | HM120767 |
| <i>E. argus barbouri</i> | EA46_ETK7  | Hap142 | Id  | 39.5  | 107.5  | China | Otog Banner, Inner Mongolia               | HM120768 |
| <i>E. argus barbouri</i> | EA47_ETK8  | Hap143 | Id  | 39.5  | 107.5  | China | Otog Banner, Inner Mongolia               | HM120768 |
| <i>E. argus barbouri</i> | EA48_ETK9  | Hap144 | Id  | 39.5  | 107.5  | China | Otog Banner, Inner Mongolia               | HM120769 |
| <i>E. argus barbouri</i> | EA49_ETK10 | Hap145 | Id  | 39.5  | 107.5  | China | Otog Banner, Inner Mongolia               | HM120769 |
| <i>E. argus barbouri</i> | EA50_ETK11 | Hap146 | IIb | 39.5  | 107.5  | China | Otog Banner, Inner Mongolia               | HM120770 |
| <i>E. argus barbouri</i> | EA51_ETK12 | Hap147 | Id  | 39.5  | 107.5  | China | Otog Banner, Inner Mongolia               | HM120770 |
| <i>E. argus argus</i>    | SJS02_12   | Hap151 | Ia  | 39.56 | 122.17 | China | Laomao Mountain, Pulandian City, Liaoning | OR019585 |
| <i>E. argus argus</i>    | SJS02_13   | Hap151 | Ia  | 39.56 | 122.17 | China | Laomao Mountain, Pulandian City, Liaoning | OR019586 |
| <i>E. argus argus</i>    | SJS02_14   | Hap151 | Ia  | 39.56 | 122.17 | China | Laomao Mountain, Pulandian City, Liaoning | OR019587 |
| <i>E. argus argus</i>    | SJS02_22   | Hap151 | Ia  | 39.56 | 122.17 | China | Laomao Mountain, Pulandian City, Liaoning | OR019594 |
| <i>E. argus argus</i>    | SJS02_26   | Hap151 | Ia  | 39.56 | 122.17 | China | Laomao Mountain, Pulandian City, Liaoning | OR019598 |
| <i>E. argus argus</i>    | SJS02_19   | Hap155 | Ia  | 39.56 | 122.17 | China | Laomao Mountain, Pulandian City, Liaoning | OR019591 |
| <i>E. argus argus</i>    | SJS02_20   | Hap156 | Ia  | 39.56 | 122.17 | China | Laomao Mountain, Pulandian City, Liaoning | OR019592 |
| <i>E. argus argus</i>    | SJS02_28   | Hap159 | Ia  | 39.56 | 122.17 | China | Laomao Mountain, Pulandian City, Liaoning | OR019600 |
| <i>E. argus argus</i>    | SJS02_11   | Hap150 | Id  | 39.56 | 122.17 | China | Laomao Mountain, Pulandian City, Liaoning | OR019584 |
| <i>E. argus argus</i>    | SJS02_23   | Hap150 | Id  | 39.56 | 122.17 | China | Laomao Mountain, Pulandian City, Liaoning | OR019595 |
| <i>E. argus argus</i>    | SJS02_15   | Hap152 | If  | 39.56 | 122.17 | China | Laomao Mountain, Pulandian City, Liaoning | OR019588 |

|                          |          |        |     |       |        |       |                                                  |          |
|--------------------------|----------|--------|-----|-------|--------|-------|--------------------------------------------------|----------|
| <i>E. argus argus</i>    | SJS02_21 | Hap157 | If  | 39.56 | 122.17 | China | Laomao Mountain, Pulandian City, Liaoning        | OR019593 |
| <i>E. argus argus</i>    | SJS02_16 | Hap153 | IIb | 39.56 | 122.17 | China | Laomao Mountain, Pulandian City, Liaoning        | OR019589 |
| <i>E. argus argus</i>    | SJS02_17 | Hap154 | IIb | 39.56 | 122.17 | China | Laomao Mountain, Pulandian City, Liaoning        | OR019590 |
| <i>E. argus argus</i>    | SJS02_24 | Hap154 | IIb | 39.56 | 122.17 | China | Laomao Mountain, Pulandian City, Liaoning        | OR019596 |
| <i>E. argus argus</i>    | SJS02_27 | Hap154 | IIb | 39.56 | 122.17 | China | Laomao Mountain, Pulandian City, Liaoning        | OR019599 |
| <i>E. argus argus</i>    | SJS02_25 | Hap158 | IIb | 39.56 | 122.17 | China | Laomao Mountain, Pulandian City, Liaoning        | OR019597 |
| <i>E. argus barbouri</i> | GXG2334  | Hap229 | IIb | 39.79 | 108.68 | China | Chahanhushu, Hangjin Banner, Inner Mongolia      | OR019550 |
| <i>E. argus barbouri</i> | GXG2535  | Hap24  | Ia  | 39.79 | 108.68 | China | Chahanhushu, Hangjin Banner, Inner Mongolia      | OR019567 |
| <i>E. argus barbouri</i> | GXG2333  | Hap228 | Id  | 39.79 | 108.68 | China | Chahanhushu, Hangjin Banner, Inner Mongolia      | OR019548 |
| <i>E. argus barbouri</i> | GXG2533  | Hap241 | Id  | 39.79 | 108.68 | China | Chahanhushu, Hangjin Banner, Inner Mongolia      | OR019565 |
| <i>E. argus barbouri</i> | GXG2332  | Hap227 | IIb | 39.79 | 108.68 | China | Chahanhushu, Hangjin Banner, Inner Mongolia      | OR019549 |
| <i>E. argus barbouri</i> | GXG2534  | Hap242 | IIb | 39.79 | 108.68 | China | Chahanhushu, Hangjin Banner, Inner Mongolia      | OR019566 |
| <i>E. argus barbouri</i> | GXG2553  | Hap246 | Ia  | 40.01 | 108.52 | China | Tabitu, Hangjin Banner, Inner Mongolia           | OR019573 |
| <i>E. argus barbouri</i> | GXG2552  | Hap216 | Ib  | 40.01 | 108.52 | China | Tabitu, Hangjin Banner, Inner Mongolia           | OR019572 |
| <i>E. argus barbouri</i> | Guo903   | Hap8   | Ib  | 40.01 | 108.52 | China | Tabitu, Hangjin Banner, Inner Mongolia           | OR019363 |
| <i>E. argus barbouri</i> | GXG2341  | Hap8   | Ib  | 40.01 | 108.52 | China | Tabitu, Hangjin Banner, Inner Mongolia           | OR019551 |
| <i>E. argus barbouri</i> | GXG2549  | Hap8   | Ib  | 40.01 | 108.52 | China | Tabitu, Hangjin Banner, Inner Mongolia           | OR019569 |
| <i>E. argus barbouri</i> | GXG2546  | Hap243 | Id  | 40.01 | 108.52 | China | Tabitu, Hangjin Banner, Inner Mongolia           | OR019568 |
| <i>E. argus barbouri</i> | GXG2551  | Hap245 | Id  | 40.01 | 108.52 | China | Tabitu, Hangjin Banner, Inner Mongolia           | OR019571 |
| <i>E. argus barbouri</i> | GXG2550  | Hap244 | IIb | 40.01 | 108.52 | China | Tabitu, Hangjin Banner, Inner Mongolia           | OR019570 |
| <i>E. argus barbouri</i> | GXG2596  | Hap247 | Ia  | 40.05 | 110.85 | China | Gongyigai village, Jungar Banner, Inner Mongolia | OR019574 |
| <i>E. argus barbouri</i> | GXG2597  | Hap247 | Ia  | 40.05 | 110.85 | China | Gongyigai village, Jungar Banner, Inner Mongolia | OR019575 |
| <i>E. argus argus</i>    | Guo9888  | Hap95  | Ia  | 40.41 | 116.31 | China | Jiuduhe town, Huairou district, Beijing City     | OR019373 |
| <i>E. argus argus</i>    | Guo9889  | Hap96  | Ia  | 40.41 | 116.31 | China | Jiuduhe town, Huairou district, Beijing City     | OR019374 |
| <i>E. argus argus</i>    | Guo9890  | Hap95  | Ia  | 40.41 | 116.31 | China | Jiuduhe town, Huairou district, Beijing City     | OR019375 |
| <i>E. argus argus</i>    | Guo9891  | Hap95  | Ia  | 40.41 | 116.31 | China | Jiuduhe town, Huairou district, Beijing City     | OR019376 |
| <i>E. argus argus</i>    | Guo9892  | Hap97  | If  | 40.41 | 116.31 | China | Jiuduhe town, Huairou district, Beijing City     | OR019377 |



|                          |           |        |     |       |        |       |                                                          |          |
|--------------------------|-----------|--------|-----|-------|--------|-------|----------------------------------------------------------|----------|
| <i>E. argus barbouri</i> | GXG1750   | Hap161 | IIb | 40.58 | 111.81 | China | Naomuqitai village, Helingeer County, Inner Mongolia     | OR019381 |
| <i>E. argus argus</i>    | Guo9906   | Hap98  | If  | 40.66 | 116.19 | China | Baihe fortress, Yanqing district, Beijing City           | OR019378 |
| <i>E. argus argus</i>    | Guo9907   | Hap99  | If  | 40.66 | 116.19 | China | Baihe fortress, Yanqing district, Beijing City           | OR019379 |
| <i>E. argus argus</i>    | Guo9914   | Hap98  | If  | 40.66 | 116.2  | China | Baihe Bridge 5, Yanqing district, Beijing City           | OR019380 |
| <i>E. argus barbouri</i> | Guo1306   | Hap24  | Ia  | 40.85 | 111.57 | China | Wusutu National Forest Park, Hohhot City, Inner Mongolia | OR019166 |
| <i>E. argus argus</i>    | Guo1305   | Hap8   | Ib  | 40.85 | 111.57 | China | Wusutu National Forest Park, Hohhot City, Inner Mongolia | OR019165 |
| <i>E. argus barbouri</i> | Guo1308   | Hap8   | Ib  | 40.85 | 111.57 | China | Wusutu National Forest Park, Hohhot City, Inner Mongolia | OR019167 |
| <i>E. argus barbouri</i> | Guo372    | Hap249 | Ia  | 40.87 | 111.81 | China | Wusutu National Forest Park, Hohhot City, Inner Mongolia | OR019294 |
| <i>E. argus barbouri</i> | Guo376    | Hap24  | Ia  | 40.87 | 111.81 | China | Wusutu National Forest Park, Hohhot City, Inner Mongolia | OR019296 |
| <i>E. argus barbouri</i> | Guo371    | Hap8   | Ib  | 40.87 | 111.81 | China | Wusutu National Forest Park, Hohhot City, Inner Mongolia | OR019293 |
| <i>E. argus barbouri</i> | Guo375    | Hap8   | Ib  | 40.87 | 111.81 | China | Wusutu National Forest Park, Hohhot City, Inner Mongolia | OR019295 |
| <i>E. argus barbouri</i> | Guo370    | Hap248 | IIb | 40.87 | 111.81 | China | Wusutu National Forest Park, Hohhot City, Inner Mongolia | OR019292 |
| <i>E. argus barbouri</i> | Guo378    | Hap248 | IIb | 40.87 | 111.81 | China | Wusutu National Forest Park, Hohhot City, Inner Mongolia | OR019297 |
| <i>E. argus barbouri</i> | GXG2222   | Hap71  | Ia  | 41.04 | 107.62 | China | Linhe district, Bayanaoer City, Inner Mongolia           | OR019522 |
| <i>E. argus barbouri</i> | EA16_XH1  | Hap116 | Id  | 41.1  | 113.9  | China | Xinghe County, Ulanqab City, Inner Mongolia              | HM120799 |
| <i>E. argus barbouri</i> | EA16_XH2  | Hap116 | Id  | 41.1  | 113.9  | China | Xinghe County, Ulanqab City, Inner Mongolia              | HM120799 |
| <i>E. argus barbouri</i> | EA16_XH3  | Hap116 | Id  | 41.1  | 113.9  | China | Xinghe County, Ulanqab City, Inner Mongolia              | HM120799 |
| <i>E. argus barbouri</i> | EA16_XH4  | Hap116 | Id  | 41.1  | 113.9  | China | Xinghe County, Ulanqab City, Inner Mongolia              | HM120799 |
| <i>E. argus barbouri</i> | EA16_XH5  | Hap116 | Id  | 41.1  | 113.9  | China | Xinghe County, Ulanqab City, Inner Mongolia              | HM120764 |
| <i>E. argus barbouri</i> | EA16_XH6  | Hap116 | Id  | 41.1  | 113.9  | China | Xinghe County, Ulanqab City, Inner Mongolia              | HM120764 |
| <i>E. argus barbouri</i> | EA16_XH7  | Hap116 | Id  | 41.1  | 113.9  | China | Xinghe County, Ulanqab City, Inner Mongolia              | HM120762 |
| <i>E. argus barbouri</i> | EA16_XH8  | Hap116 | Id  | 41.1  | 113.9  | China | Xinghe County, Ulanqab City, Inner Mongolia              | HM120762 |
| <i>E. argus barbouri</i> | EA16_XH9  | Hap116 | Id  | 41.1  | 113.9  | China | Xinghe County, Ulanqab City, Inner Mongolia              | HM120800 |
| <i>E. argus barbouri</i> | EA17_XH10 | Hap117 | Id  | 41.1  | 113.9  | China | Xinghe County, Ulanqab City, Inner Mongolia              | HM120800 |
| <i>E. argus barbouri</i> | EA20_XH11 | Hap120 | Ib  | 41.1  | 113.9  | China | Xinghe County, Ulanqab City, Inner Mongolia              | HM120800 |
| <i>E. argus barbouri</i> | EA33_XH12 | Hap132 | Id  | 41.1  | 113.9  | China | Xinghe County, Ulanqab City, Inner Mongolia              | HM120800 |
| <i>E. argus barbouri</i> | GXG2206   | Hap57  | Ic  | 41.11 | 107.87 | China | Liangergedan, Wuyuan County, Inner Mongolia              | OR019519 |

|                          |         |        |     |       |        |       |                                                                    |          |
|--------------------------|---------|--------|-----|-------|--------|-------|--------------------------------------------------------------------|----------|
| <i>E. argus barbouri</i> | GXG2207 | Hap57  | Ic  | 41.11 | 107.87 | China | Liangergedan, Wuyuan County, Inner Mongolia                        | OR019520 |
| <i>E. argus barbouri</i> | GXG2085 | Hap211 | Ia  | 41.34 | 108.5  | China | Wind-eroded Ice Mortar Geopark, Urad Middle Banner, Inner Mongolia | OR019496 |
| <i>E. argus barbouri</i> | GXG2086 | Hap212 | Ia  | 41.34 | 108.5  | China | Wind-eroded Ice Mortar Geopark, Urad Middle Banner, Inner Mongolia | OR019497 |
| <i>E. argus barbouri</i> | GXG2087 | Hap211 | Ia  | 41.34 | 108.5  | China | Wind-eroded Ice Mortar Geopark, Urad Middle Banner, Inner Mongolia | OR019498 |
| <i>E. argus argus</i>    | Guo1187 | Hap58  | Ic  | 41.34 | 108.51 | China | Laoyao, Urad Middle Banner, Inner Mongolia                         | OR019156 |
| <i>E. argus barbouri</i> | GXG1989 | Hap8   | Ib  | 41.43 | 109.23 | China | Houmaohuduge, Urad Middle Banner, Inner Mongolia                   | OR019476 |
| <i>E. argus barbouri</i> | GXG1990 | Hap8   | Ib  | 41.43 | 109.23 | China | Houmaohuduge, Urad Middle Banner, Inner Mongolia                   | OR019477 |
| <i>E. argus barbouri</i> | GXG1992 | Hap8   | Ib  | 41.43 | 109.23 | China | Houmaohuduge, Urad Middle Banner, Inner Mongolia                   | OR019479 |
| <i>E. argus barbouri</i> | GXG1994 | Hap8   | Ib  | 41.43 | 109.23 | China | Houmaohuduge, Urad Middle Banner, Inner Mongolia                   | OR019480 |
| <i>E. argus barbouri</i> | GXG1991 | Hap205 | Ic  | 41.43 | 109.23 | China | Houmaohuduge, Urad Middle Banner, Inner Mongolia                   | OR019478 |
| <i>E. argus barbouri</i> | GXG1946 | Hap193 | Ia  | 41.44 | 110.84 | China | Saiwusu village, Darhan-Muminggan Joint County, Inner Mongolia     | OR019451 |
| <i>E. argus barbouri</i> | GXG1947 | Hap193 | Ia  | 41.44 | 110.84 | China | Saiwusu village, Darhan-Muminggan Joint County, Inner Mongolia     | OR019452 |
| <i>E. argus barbouri</i> | GXG2367 | Hap231 | Id  | 41.51 | 108.78 | China | Bayinhaitaisumu, Urad Middle Banner, Inner Mongolia                | OR019553 |
| <i>E. argus barbouri</i> | GXG2359 | Hap230 | IIb | 41.51 | 108.78 | China | Bayinhaitaisumu, Urad Middle Banner, Inner Mongolia                | OR019552 |
| <i>E. argus barbouri</i> | GXG2368 | Hap232 | Ia  | 41.52 | 108.65 | China | Tatuer, Urad Middle Banner, Inner Mongolia                         | OR019554 |
| <i>E. argus barbouri</i> | GXG2371 | Hap57  | Ic  | 41.52 | 108.65 | China | Tatuer, Urad Middle Banner, Inner Mongolia                         | OR019555 |
| <i>E. argus barbouri</i> | GXG2373 | Hap8   | Ib  | 41.52 | 108.65 | China | Tatuer, Urad Middle Banner, Inner Mongolia                         | OR019556 |
| <i>E. argus barbouri</i> | GXG1758 | Hap163 | Ia  | 41.55 | 113.48 | China | Houershuan village, Shangdu County, Inner Mongolia                 | OR019383 |
| <i>E. argus barbouri</i> | GXG1759 | Hap164 | Ia  | 41.55 | 113.48 | China | Houershuan village, Shangdu County, Inner Mongolia                 | OR019384 |
| <i>E. argus barbour</i>  | GXG1757 | Hap162 | IIb | 41.55 | 113.48 | China | Houershuan village, Shangdu County, Inner Mongolia                 | OR019382 |
| <i>E. argus argus</i>    | Guo1169 | Hap56  | Ia  | 41.61 | 108.52 | China | Xiaertu, Urad Middle Banner, Inner Mongolia                        | OR019151 |
| <i>E. argus argus</i>    | Guo1170 | Hap57  | Ic  | 41.61 | 108.52 | China | Xiaertu, Urad Middle Banner, Inner Mongolia                        | OR019153 |

|                          |          |        |    |       |        |       |                                                                         |          |
|--------------------------|----------|--------|----|-------|--------|-------|-------------------------------------------------------------------------|----------|
| <i>E. argus barbouri</i> | Guo1175  | Hap8   | Ib | 41.69 | 108.41 | China | Haoraotu, Urad Middle Banner, Inner Mongolia                            | OR019154 |
| <i>E. argus barbouri</i> | ROM37590 | Hap8   | Ib | 41.85 | 111.21 | China | Wulanhua town, Siziwang Banner, Inner Mongolia                          | OR019583 |
| <i>E. argus barbouri</i> | GXG1942  | Hap8   | Ib | 42.02 | 110.16 | China | Chagandele, Darhan-Muminggan Joint County, Inner Mongolia               | OR019448 |
| <i>E. argus barbouri</i> | ROM37439 | Hap24  | Ia | 42.07 | 111.73 | China | Chaganerige, Siziwang Banner, Inner Mongolia                            | OR019581 |
| <i>E. argus barbouri</i> | GXG1944  | Hap192 | Ia | 42.08 | 110.17 | China | South of Bayinwulangacha, Darhan-Muminggan Joint County, Inner Mongolia | OR019450 |
| <i>E. argus barbouri</i> | GXG2224  | Hap216 | Ib | 42.08 | 110.17 | China | South of Bayinwulangacha, Darhan-Muminggan Joint County, Inner Mongolia | OR019523 |
| <i>E. argus barbouri</i> | GXG1943  | Hap8   | Ib | 42.09 | 110.17 | China | North of Bayinwulangacha, Darhan-Muminggan Joint County, Inner Mongolia | OR019449 |
| <i>E. argus barbouri</i> | Guo1235  | Hap24  | Ia | 42.26 | 110.51 | China | NE Chaganhadasumu, Darhan-Muminggan Joint Banner, Inner Mongolia        | OR019162 |
| <i>E. argus argus</i>    | Guo1234  | Hap60  | Ie | 42.26 | 110.51 | China | NE Chaganhadasumu, Darhan-Muminggan Joint Banner, Inner Mongolia        | OR019161 |
| <i>E. argus barbouri</i> | Guo1236  | Hap30  | If | 42.26 | 110.51 | China | NE Chaganhadasumu, Darhan-Muminggan Joint Banner, Inner Mongolia        | OR019163 |
| <i>E. argus barbouri</i> | GXG1954  | Hap24  | Ia | 42.27 | 109.9  | China | Bayinhua town, Darhan-Muminggan Joint Banner, Inner Mongolia            | OR019455 |
| <i>E. argus barbouri</i> | GXG1955  | Hap194 | Ia | 42.27 | 109.9  | China | Bayinhua town, Darhan-Muminggan Joint Banner, Inner Mongolia            | OR019456 |
| <i>E. argus barbouri</i> | GXG1956  | Hap24  | Ia | 42.27 | 109.9  | China | Bayinhua town, Darhan-Muminggan Joint Banner, Inner Mongolia            | OR019457 |
| <i>E. argus barbouri</i> | GXG2233  | Hap24  | Ia | 42.27 | 109.9  | China | Bayinhua town, Darhan-Muminggan Joint Banner, Inner Mongolia            | OR019526 |
| <i>E. argus barbouri</i> | GXG2237  | Hap24  | Ia | 42.27 | 109.9  | China | Bayinhua town, Darhan-Muminggan Joint Banner, Inner Mongolia            | OR019528 |

|                          |         |        |     |       |        |       |                                                              |          |
|--------------------------|---------|--------|-----|-------|--------|-------|--------------------------------------------------------------|----------|
| <i>E. argus barbouri</i> | GXG2232 | Hap217 | Ib  | 42.27 | 109.9  | China | Bayinhua town, Darhan-Muminggan Joint Banner, Inner Mongolia | OR019525 |
| <i>E. argus barbouri</i> | GXG1953 | Hap8   | Ib  | 42.27 | 109.9  | China | Bayinhua town, Darhan-Muminggan Joint Banner, Inner Mongolia | OR019454 |
| <i>E. argus barbouri</i> | GXG2236 | Hap8   | Ib  | 42.27 | 109.9  | China | Bayinhua town, Darhan-Muminggan Joint Banner, Inner Mongolia | OR019527 |
| <i>E. argus barbouri</i> | GXG2238 | Hap218 | Id  | 42.27 | 109.9  | China | Bayinhua town, Darhan-Muminggan Joint Banner, Inner Mongolia | OR019529 |
| <i>E. argus barbouri</i> | GXG2239 | Hap219 | IIb | 42.27 | 109.9  | China | Bayinhua town, Darhan-Muminggan Joint Banner, Inner Mongolia | OR019530 |
| <i>E. argus barbouri</i> | GXG2240 | Hap219 | IIb | 42.27 | 109.9  | China | Bayinhua town, Darhan-Muminggan Joint Banner, Inner Mongolia | OR019531 |
| <i>E. argus argus</i>    | GXG2178 | Hap8   | Ib  | 42.34 | 112.24 | China | Gejige, Siziwang Banner, Inner Mongolia                      | OR019509 |
| <i>E. argus argus</i>    | GXG2187 | Hap162 | IIb | 42.34 | 112.24 | China | Gejige, Siziwang Banner, Inner Mongolia                      | OR019510 |
| <i>E. argus argus</i>    | GXG2188 | Hap8   | Ib  | 42.34 | 112.24 | China | Gejige, Siziwang Banner, Inner Mongolia                      | OR019511 |
| <i>E. argus argus</i>    | GXG2189 | Hap162 | IIb | 42.34 | 112.24 | China | Gejige, Siziwang Banner, Inner Mongolia                      | OR019512 |
| <i>E. argus argus</i>    | GXG2192 | Hap162 | IIb | 42.34 | 112.24 | China | Gejige, Siziwang Banner, Inner Mongolia                      | OR019513 |
| <i>E. argus argus</i>    | GXG2193 | Hap8   | Ib  | 42.34 | 112.24 | China | Gejige, Siziwang Banner, Inner Mongolia                      | OR019514 |
| <i>E. argus argus</i>    | GXG2194 | Hap213 | Ia  | 42.34 | 112.24 | China | Gejige, Siziwang Banner, Inner Mongolia                      | OR019515 |
| <i>E. argus argus</i>    | GXG2195 | Hap162 | IIb | 42.34 | 112.24 | China | Gejige, Siziwang Banner, Inner Mongolia                      | OR019516 |
| <i>E. argus argus</i>    | GXG2196 | Hap214 | IIb | 42.34 | 112.24 | China | Gejige, Siziwang Banner, Inner Mongolia                      | OR019517 |
| <i>E. argus argus</i>    | GXG2197 | Hap8   | Ib  | 42.34 | 112.24 | China | Gejige, Siziwang Banner, Inner Mongolia                      | OR019518 |
| <i>E. argus barbouri</i> | GXG2242 | Hap24  | Ia  | 42.41 | 110.01 | China | G210-118, Darhan-Muminggan Joint Banner, Inner Mongolia      | OR019532 |
| <i>E. argus barbouri</i> | GXG2257 | Hap8   | Ib  | 42.41 | 110.01 | China | G210-118, Darhan-Muminggan Joint Banner, Inner Mongolia      | OR019533 |
| <i>E. argus barbouri</i> | GXG2258 | Hap24  | Ia  | 42.41 | 110.01 | China | G210-118, Darhan-Muminggan Joint Banner, Inner Mongolia      | OR019534 |

|                          |          |        |     |       |        |       |                                                         |          |
|--------------------------|----------|--------|-----|-------|--------|-------|---------------------------------------------------------|----------|
|                          |          |        |     |       |        |       | Mongolia                                                |          |
| <i>E. argus barbouri</i> | GXG2231  | Hap187 | Ia  | 42.47 | 110.44 | China | Xiridele, Darhan-Muminggan Joint Banner, Inner Mongolia | OR019524 |
| <i>E. argus barbouri</i> | GXG1952  | Hap8   | Ib  | 42.48 | 110.33 | China | E'ru, Darhan-Muminggan Joint Banner, Inner Mongolia     | OR019453 |
| <i>E. argus argus</i>    | GXG2158  | Hap162 | IIb | 42.56 | 112.42 | China | G209-184, Sonid Right Banner, Inner Mongolia            | OR019507 |
| <i>E. argus argus</i>    | GXG2160  | Hap162 | IIb | 42.56 | 112.42 | China | G209-184, Sonid Right Banner, Inner Mongolia            | OR019508 |
| <i>E. argus argus</i>    | Guo1222  | Hap59  | Id  | 42.65 | 115.58 | China | Zhuha, Zhenglan Banner, Inner Mongolia                  | OR019159 |
| <i>E. argus barbouri</i> | Guo1237  | Hap61  | Ic  | 42.65 | 115.58 | China | Zhuha, Zhenglan Banner, Inner Mongolia                  | OR019164 |
| <i>E. argus argus</i>    | Guo1807  | Hap250 | Ia  | 42.77 | 122.47 | China | Zhanggutai Town, Zhangwu County, Liaoning               | OR019232 |
| <i>E. argus argus</i>    | Guo1808  | Hap250 | Ia  | 42.77 | 122.47 | China | Zhanggutai Town, Zhangwu County, Liaoning               | OR019233 |
| <i>E. argus argus</i>    | Guo1809  | Hap250 | Ia  | 42.77 | 122.47 | China | Zhanggutai Town, Zhangwu County, Liaoning               | OR019234 |
| <i>E. argus argus</i>    | Guo1810  | Hap250 | Ia  | 42.77 | 122.47 | China | Zhanggutai Town, Zhangwu County, Liaoning               | OR019235 |
| <i>E. argus argus</i>    | Guo1811  | Hap251 | Ia  | 42.77 | 122.47 | China | Zhanggutai Town, Zhangwu County, Liaoning               | OR019236 |
| <i>E. argus argus</i>    | Guo1812  | Hap252 | Ia  | 42.77 | 122.47 | China | Zhanggutai Town, Zhangwu County, Liaoning               | OR019237 |
| <i>E. argus argus</i>    | Guo1813  | Hap253 | Ia  | 42.77 | 122.47 | China | Zhanggutai Town, Zhangwu County, Liaoning               | OR019238 |
| <i>E. argus argus</i>    | Guo1814  | Hap250 | Ia  | 42.77 | 122.47 | China | Zhanggutai Town, Zhangwu County, Liaoning               | OR019239 |
| <i>E. argus argus</i>    | Guo1815  | Hap250 | Ia  | 42.77 | 122.47 | China | Zhanggutai Town, Zhangwu County, Liaoning               | OR019240 |
| <i>E. argus argus</i>    | Guo1817  | Hap250 | Ia  | 42.77 | 122.47 | China | Zhanggutai Town, Zhangwu County, Liaoning               | OR019242 |
| <i>E. argus argus</i>    | Guo1816  | Hap252 | Ia  | 42.77 | 122.47 | China | Zhanggutai Town, Zhangwu County, Liaoning               | OR019241 |
| <i>E. argus argus</i>    | Guo1818  | Hap253 | Ia  | 42.77 | 122.47 | China | Zhanggutai Town, Zhangwu County, Liaoning               | OR019243 |
| <i>E. argus argus</i>    | Guo1832  | Hap250 | Ia  | 42.77 | 122.47 | China | Zhanggutai Town, Zhangwu County, Liaoning               | OR019254 |
| <i>Eremias argus</i>     | Guo1833  | Hap258 | Ia  | 42.77 | 122.47 | China | Zhanggutai Town, Zhangwu County, Liaoning               | OR019255 |
| <i>E. argus argus</i>    | ROM37512 | Hap25  | Ia  | 42.82 | 112.67 | China | Abrahamtara Town, Sonid Right Banner, Inner Mongolia    | OR019582 |
| <i>E. argus argus</i>    | Guo1821  | Hap254 | Ia  | 42.82 | 122.38 | China | Beidianzi village, Zhangwu County, Liaoning             | OR019244 |
| <i>E. argus argus</i>    | Guo1822  | Hap36  | Ia  | 42.82 | 122.38 | China | Beidianzi village, Zhangwu County, Liaoning             | OR019245 |
| <i>E. argus argus</i>    | Guo1823  | Hap255 | If  | 42.82 | 122.38 | China | Beidianzi village, Zhangwu County, Liaoning             | OR019246 |
| <i>E. argus argus</i>    | Guo1824  | Hap256 | Ia  | 42.82 | 122.38 | China | Beidianzi village, Zhangwu County, Liaoning             | OR019247 |
| <i>E. argus argus</i>    | Guo1825  | Hap256 | Ia  | 42.82 | 122.38 | China | Beidianzi village, Zhangwu County, Liaoning             | OR019248 |

|                       |         |        |     |       |        |       |                                                  |          |
|-----------------------|---------|--------|-----|-------|--------|-------|--------------------------------------------------|----------|
| <i>E. argus argus</i> | Guo1826 | Hap254 | Ia  | 42.82 | 122.38 | China | Beidianzi village, Zhangwu County, Liaoning      | OR019249 |
| <i>E. argus argus</i> | Guo1827 | Hap254 | Ia  | 42.82 | 122.38 | China | Beidianzi village, Zhangwu County, Liaoning      | OR019250 |
| <i>E. argus argus</i> | Guo1828 | Hap256 | Ia  | 42.82 | 122.38 | China | Beidianzi village, Zhangwu County, Liaoning      | OR019251 |
| <i>E. argus argus</i> | Guo1829 | Hap257 | Ia  | 42.82 | 122.38 | China | Beidianzi village, Zhangwu County, Liaoning      | OR019252 |
| <i>E. argus argus</i> | Guo1830 | Hap256 | Ia  | 42.82 | 122.38 | China | Beidianzi village, Zhangwu County, Liaoning      | OR019253 |
| <i>E. argus argus</i> | Guo1844 | Hap259 | Ia  | 42.86 | 123.2  | China | Jinshatan, Erniu town, Kangping County, Liaoning | OR019256 |
| <i>E. argus argus</i> | Guo1845 | Hap260 | Ia  | 42.86 | 123.2  | China | Jinshatan, Erniu town, Kangping County, Liaoning | OR019257 |
| <i>E. argus argus</i> | Guo1846 | Hap259 | Ia  | 42.86 | 123.2  | China | Jinshatan, Erniu town, Kangping County, Liaoning | OR019258 |
| <i>E. argus argus</i> | Guo1847 | Hap261 | Ia  | 42.86 | 123.2  | China | Jinshatan, Erniu town, Kangping County, Liaoning | OR019259 |
| <i>E. argus argus</i> | Guo1848 | Hap261 | Ia  | 42.86 | 123.2  | China | Jinshatan, Erniu town, Kangping County, Liaoning | OR019260 |
| <i>E. argus argus</i> | Guo1849 | Hap262 | Ia  | 42.86 | 123.2  | China | Jinshatan, Erniu town, Kangping County, Liaoning | OR019261 |
| <i>E. argus argus</i> | Guo1850 | Hap263 | Ia  | 42.86 | 123.2  | China | Jinshatan, Erniu town, Kangping County, Liaoning | OR019262 |
| <i>E. argus argus</i> | Guo1851 | Hap261 | Ia  | 42.86 | 123.2  | China | Jinshatan, Erniu town, Kangping County, Liaoning | OR019263 |
| <i>E. argus argus</i> | Guo1852 | Hap260 | Ia  | 42.86 | 123.2  | China | Jinshatan, Erniu town, Kangping County, Liaoning | OR019264 |
| <i>E. argus argus</i> | Guo1853 | Hap181 | Id  | 42.86 | 123.2  | China | Jinshatan, Erniu town, Kangping County, Liaoning | OR019265 |
| <i>E. argus argus</i> | Guo1854 | Hap263 | Ia  | 42.86 | 123.2  | China | Jinshatan, Erniu town, Kangping County, Liaoning | OR019266 |
| <i>E. argus argus</i> | Guo1855 | Hap263 | Ia  | 42.86 | 123.2  | China | Jinshatan, Erniu town, Kangping County, Liaoning | OR019267 |
| <i>E. argus argus</i> | Guo1856 | Hap260 | Ia  | 42.86 | 123.2  | China | Jinshatan, Erniu town, Kangping County, Liaoning | OR019268 |
| <i>E. argus argus</i> | Guo1857 | Hap264 | Ia  | 42.86 | 123.2  | China | Jinshatan, Erniu town, Kangping County, Liaoning | OR019269 |
| <i>E. argus argus</i> | GXG1885 | Hap8   | Ib  | 42.86 | 112.58 | China | G208-108, Sonid Right Banner, Inner Mongolia     | OR019441 |
| <i>E. argus argus</i> | GXG1877 | Hap162 | IIb | 42.86 | 112.58 | China | G208-108, Sonid Right Banner, Inner Mongolia     | OR019439 |
| <i>E. argus argus</i> | GXG1878 | Hap187 | Ia  | 42.86 | 112.58 | China | G208-108, Sonid Right Banner, Inner Mongolia     | OR019440 |
| <i>E. argus argus</i> | GXG1774 | Hap167 | Id  | 42.89 | 120.34 | China | Changqin village, Aohan Banner, Inner Mongolia   | OR019390 |
| <i>E. argus argus</i> | GXG1775 | Hap167 | Id  | 42.89 | 120.34 | China | Changqin village, Aohan Banner, Inner Mongolia   | OR019391 |
| <i>E. argus argus</i> | GXG1783 | Hap168 | Id  | 42.89 | 120.34 | China | Changqin village, Aohan Banner, Inner Mongolia   | OR019392 |
| <i>E. argus argus</i> | GXG1784 | Hap169 | IIb | 42.89 | 120.34 | China | Changqin village, Aohan Banner, Inner Mongolia   | OR019393 |
| <i>E. argus argus</i> | GXG1786 | Hap170 | IIb | 42.89 | 120.34 | China | Changqin village, Aohan Banner, Inner Mongolia   | OR019394 |

|                       |         |        |     |       |        |       |                                                   |          |
|-----------------------|---------|--------|-----|-------|--------|-------|---------------------------------------------------|----------|
| <i>E. argus argus</i> | GXG1787 | Hap171 | IIb | 42.89 | 120.34 | China | Changqin village, Aohan Banner, Inner Mongolia    | OR019395 |
| <i>E. argus argus</i> | GXG1788 | Hap172 | IIb | 42.89 | 120.34 | China | Changqin village, Aohan Banner, Inner Mongolia    | OR019396 |
| <i>E. argus argus</i> | GXG1791 | Hap168 | Id  | 42.89 | 120.34 | China | Changqin village, Aohan Banner, Inner Mongolia    | OR019397 |
| <i>E. argus argus</i> | GXG1795 | Hap168 | Id  | 42.89 | 120.34 | China | Changqin village, Aohan Banner, Inner Mongolia    | OR019398 |
| <i>E. argus argus</i> | GXG1797 | Hap169 | IIb | 42.89 | 120.34 | China | Changqin village, Aohan Banner, Inner Mongolia    | OR019399 |
| <i>E. argus argus</i> | GXG2208 | Hap215 | Id  | 43.03 | 112.81 | China | G209-115, Sonid Right Banner, Inner Mongolia      | OR019521 |
| <i>E. argus argus</i> | GXG1768 | Hap26  | Ia  | 43.24 | 118.03 | China | Heyan village, Keshiketeng Banner, Inner Mongolia | OR019385 |
| <i>E. argus argus</i> | GXG1769 | Hap165 | Ia  | 43.24 | 118.03 | China | Heyan village, Keshiketeng Banner, Inner Mongolia | OR019386 |
| <i>E. argus argus</i> | GXG1770 | Hap26  | Ia  | 43.24 | 118.03 | China | Heyan village, Keshiketeng Banner, Inner Mongolia | OR019387 |
| <i>E. argus argus</i> | GXG1771 | Hap166 | Id  | 43.24 | 118.03 | China | Heyan village, Keshiketeng Banner, Inner Mongolia | OR019388 |
| <i>E. argus argus</i> | GXG1772 | Hap26  | Ia  | 43.24 | 118.03 | China | Heyan village, Keshiketeng Banner, Inner Mongolia | OR019389 |
| <i>E. argus argus</i> | GXG1799 | Hap36  | Ia  | 43.24 | 122.24 | China | Bahutasumu, Kerqin Right Banner, Inner Mongolia   | OR019400 |
| <i>E. argus argus</i> | GXG1820 | Hap175 | IIa | 43.24 | 122.24 | China | Bahutasumu, Kerqin Right Banner, Inner Mongolia   | OR019416 |
| <i>E. argus argus</i> | GXG1821 | Hap36  | Ia  | 43.24 | 122.24 | China | Bahutasumu, Kerqin Right Banner, Inner Mongolia   | OR019417 |
| <i>E. argus argus</i> | GXG1822 | Hap175 | IIa | 43.24 | 122.24 | China | Bahutasumu, Kerqin Right Banner, Inner Mongolia   | OR019418 |
| <i>E. argus argus</i> | GXG1824 | Hap176 | Ia  | 43.24 | 122.24 | China | Bahutasumu, Kerqin Right Banner, Inner Mongolia   | OR019419 |
| <i>E. argus argus</i> | GXG1934 | Hap189 | Ia  | 43.33 | 115.69 | China | Hongergaole town, Abaga Banner, Inner Mongolia    | OR019445 |
| <i>E. argus argus</i> | GXG1935 | Hap190 | Ia  | 43.33 | 115.69 | China | Hongergaole town, Abaga Banner, Inner Mongolia    | OR019446 |
| <i>E. argus argus</i> | GXG1936 | Hap191 | Ib  | 43.33 | 115.69 | China | Hongergaole town, Abaga Banner, Inner Mongolia    | OR019447 |
| <i>E. argus argus</i> | GXG1833 | Hap177 | Id  | 43.33 | 115.69 | China | Hongergaole town, Abaga Banner, Inner Mongolia    | OR019420 |
| <i>E. argus argus</i> | GXG1836 | Hap21  | If  | 43.33 | 115.69 | China | Hongergaole town, Abaga Banner, Inner Mongolia    | OR019421 |
| <i>E. argus argus</i> | GXG1839 | Hap22  | If  | 43.33 | 115.69 | China | Hongergaole town, Abaga Banner, Inner Mongolia    | OR019422 |
| <i>E. argus argus</i> | GXG1933 | Hap22  | If  | 43.33 | 115.69 | China | Hongergaole town, Abaga Banner, Inner Mongolia    | OR019444 |
| <i>E. argus argus</i> | GXG1876 | Hap186 | Ia  | 43.34 | 112.2  | China | Wusutu, Erenhot City, Inner Mongolia              | OR019438 |
| <i>E. argus argus</i> | GXG1875 | Hap8   | Ib  | 43.34 | 112.2  | China | Wusutu, Erenhot City, Inner Mongolia              | OR019437 |
| <i>E. argus argus</i> | GXG2101 | Hap8   | Ib  | 43.34 | 112.2  | China | Wusutu, Erenhot City, Inner Mongolia              | OR019500 |
| <i>E. argus argus</i> | GXG2115 | Hap8   | Ib  | 43.34 | 112.2  | China | Wusutu, Erenhot City, Inner Mongolia              | OR019503 |

|                       |         |        |     |       |        |       |                                                |          |
|-----------------------|---------|--------|-----|-------|--------|-------|------------------------------------------------|----------|
| <i>E. argus argus</i> | GXG2118 | Hap8   | Ib  | 43.34 | 112.2  | China | Wusutu, Erenhot City, Inner Mongolia           | OR019506 |
| <i>E. argus argus</i> | GXG2100 | Hap162 | IIb | 43.34 | 112.2  | China | Wusutu, Erenhot City, Inner Mongolia           | OR019499 |
| <i>E. argus argus</i> | GXG2113 | Hap162 | IIb | 43.34 | 112.2  | China | Wusutu, Erenhot City, Inner Mongolia           | OR019501 |
| <i>E. argus argus</i> | GXG2114 | Hap162 | IIb | 43.34 | 112.2  | China | Wusutu, Erenhot City, Inner Mongolia           | OR019502 |
| <i>E. argus argus</i> | GXG2116 | Hap162 | IIb | 43.34 | 112.2  | China | Wusutu, Erenhot City, Inner Mongolia           | OR019504 |
| <i>E. argus argus</i> | GXG2117 | Hap162 | IIb | 43.34 | 112.2  | China | Wusutu, Erenhot City, Inner Mongolia           | OR019505 |
| <i>E. argus argus</i> | GXG1909 | Hap188 | Ia  | 43.36 | 115.75 | China | Hongergaole town, Abaga Banner, Inner Mongolia | OR019442 |
| <i>E. argus argus</i> | WDC057  | Hap20  | Ia  | 43.36 | 115.75 | China | Hongergaole town, Abaga Banner, Inner Mongolia | OR019613 |
| <i>E. argus argus</i> | WDC058  | Hap21  | If  | 43.36 | 115.75 | China | Hongergaole town, Abaga Banner, Inner Mongolia | OR019614 |
| <i>E. argus argus</i> | WDC060  | Hap22  | If  | 43.36 | 115.75 | China | Hongergaole town, Abaga Banner, Inner Mongolia | OR019615 |
| <i>E. argus argus</i> | WDC061  | Hap22  | If  | 43.36 | 115.75 | China | Hongergaole town, Abaga Banner, Inner Mongolia | OR019616 |
| <i>E. argus argus</i> | WDC062  | Hap8   | Ib  | 43.36 | 115.75 | China | Hongergaole town, Abaga Banner, Inner Mongolia | OR019617 |
| <i>E. argus argus</i> | WDC063  | Hap22  | If  | 43.36 | 115.75 | China | Hongergaole town, Abaga Banner, Inner Mongolia | OR019618 |
| <i>E. argus argus</i> | WDC064  | Hap23  | Ia  | 43.36 | 115.75 | China | Hongergaole town, Abaga Banner, Inner Mongolia | OR019619 |
| <i>E. argus argus</i> | WDC065  | Hap21  | If  | 43.36 | 115.75 | China | Hongergaole town, Abaga Banner, Inner Mongolia | OR019620 |
| <i>E. argus argus</i> | WDC067  | Hap22  | If  | 43.36 | 115.75 | China | Hongergaole town, Abaga Banner, Inner Mongolia | OR019621 |
| <i>E. argus argus</i> | WDC082  | Hap8   | Ib  | 43.36 | 115.75 | China | Hongergaole town, Abaga Banner, Inner Mongolia | OR019622 |
| <i>E. argus argus</i> | GXG1918 | Hap22  | If  | 43.36 | 115.75 | China | Hongergaole town, Abaga Banner, Inner Mongolia | OR019443 |
| <i>E. argus argus</i> | GXG2055 | Hap210 | Ia  | 43.73 | 112.75 | China | G331-6155, Sonid Left Banner, Inner Mongolia   | OR019491 |
| <i>E. argus argus</i> | GXG2056 | Hap209 | Ia  | 43.73 | 112.75 | China | G331-6155, Sonid Left Banner, Inner Mongolia   | OR019492 |
| <i>E. argus argus</i> | GXG2058 | Hap8   | Ib  | 43.73 | 112.75 | China | G331-6155, Sonid Left Banner, Inner Mongolia   | OR019493 |
| <i>E. argus argus</i> | GXG2060 | Hap22  | If  | 43.73 | 112.75 | China | G331-6155, Sonid Left Banner, Inner Mongolia   | OR019494 |
| <i>E. argus argus</i> | GXG2062 | Hap8   | Ib  | 43.73 | 112.75 | China | G331-6155, Sonid Left Banner, Inner Mongolia   | OR019495 |
| <i>E. argus argus</i> | GXG1862 | Hap90  | Ic  | 43.76 | 113.13 | China | G331-6155, Sonid Left Banner, Inner Mongolia   | OR019433 |
| <i>E. argus argus</i> | GXG1863 | Hap184 | Ia  | 43.76 | 113.13 | China | G331-6155, Sonid Left Banner, Inner Mongolia   | OR019434 |
| <i>E. argus argus</i> | GXG1864 | Hap185 | Ia  | 43.76 | 113.13 | China | G331-6155, Sonid Left Banner, Inner Mongolia   | OR019435 |
| <i>E. argus argus</i> | GXG1868 | Hap185 | Ia  | 43.76 | 113.13 | China | G331-6155, Sonid Left Banner, Inner Mongolia   | OR019436 |



|                          |          |        |    |       |        |          |                                              |          |
|--------------------------|----------|--------|----|-------|--------|----------|----------------------------------------------|----------|
| <i>E. argus argus</i>    | GXG2032  | Hap185 | Ia | 43.76 | 113.13 | China    | G331-6155, Sonid Left Banner, Inner Mongolia | OR019487 |
| <i>E. argus argus</i>    | GXG2036  | Hap185 | Ia | 43.76 | 113.13 | China    | G331-6155, Sonid Left Banner, Inner Mongolia | OR019488 |
| <i>E. argus argus</i>    | GXG2037  | Hap208 | Ia | 43.76 | 113.13 | China    | G331-6155, Sonid Left Banner, Inner Mongolia | OR019489 |
| <i>E. argus argus</i>    | GXG2042  | Hap209 | Ia | 43.76 | 113.13 | China    | G331-6155, Sonid Left Banner, Inner Mongolia | OR019490 |
| <i>E. argus argus</i>    | Guo2504  | Hap22  | If | 43.83 | 116.14 | China    | Shuliteamu, Xilinhot City, Inner Mongolia    | OR019277 |
| <i>E. argus argus</i>    | Guo2505  | Hap83  | Ie | 43.83 | 116.14 | China    | Shuliteamu, Xilinhot City, Inner Mongolia    | OR019278 |
| <i>E. argus argus</i>    | GXG1852  | Hap180 | Ia | 43.84 | 113.99 | China    | Tamugate, Abaga Banner, Inner Mongolia       | OR019426 |
| <i>E. argus argus</i>    | GXG1854  | Hap182 | Ia | 43.84 | 113.99 | China    | Tamugate, Abaga Banner, Inner Mongolia       | OR019428 |
| <i>E. argus argus</i>    | GXG1858  | Hap183 | Ia | 43.84 | 113.99 | China    | Tamugate, Abaga Banner, Inner Mongolia       | OR019432 |
| <i>E. argus argus</i>    | GXG2028  | Hap183 | Ia | 43.84 | 113.99 | China    | Tamugate, Abaga Banner, Inner Mongolia       | OR019486 |
| <i>E. argus barbouri</i> | KU331054 | Hap19  | Id | 43.84 | 102.73 | Mongolia | Sevrei, Omnogovi                             | OR019119 |
| <i>E. argus argus</i>    | GXG1853  | Hap181 | Id | 43.84 | 113.99 | China    | Tamugate, Abaga Banner, Inner Mongolia       | OR019427 |
| <i>E. argus argus</i>    | GXG1855  | Hap22  | If | 43.84 | 113.99 | China    | Tamugate, Abaga Banner, Inner Mongolia       | OR019429 |
| <i>E. argus argus</i>    | GXG1856  | Hap8   | Ib | 43.84 | 113.99 | China    | Tamugate, Abaga Banner, Inner Mongolia       | OR019430 |
| <i>E. argus argus</i>    | GXG1857  | Hap8   | Ib | 43.84 | 113.99 | China    | Tamugate, Abaga Banner, Inner Mongolia       | OR019431 |
| <i>E. argus argus</i>    | GXG2025  | Hap8   | Ib | 43.84 | 113.99 | China    | Tamugate, Abaga Banner, Inner Mongolia       | OR019484 |
| <i>E. argus argus</i>    | GXG2027  | Hap22  | If | 43.84 | 113.99 | China    | Tamugate, Abaga Banner, Inner Mongolia       | OR019485 |
| <i>E. argus argus</i>    | GXG1960  | Hap195 | Ia | 43.93 | 115.81 | China    | Jirigelangtu, Xilinhot City, Inner Mongolia  | OR019458 |
| <i>E. argus argus</i>    | GXG1961  | Hap22  | If | 43.93 | 115.81 | China    | Jirigelangtu, Xilinhot City, Inner Mongolia  | OR019459 |
| <i>E. argus argus</i>    | GXG1962  | Hap22  | If | 43.95 | 114.72 | China    | Arenwusu, Abaga Banner, Inner Mongolia       | OR019460 |
| <i>E. argus argus</i>    | GXG1965  | Hap22  | If | 43.95 | 114.72 | China    | Arenwusu, Abaga Banner, Inner Mongolia       | OR019461 |
| <i>E. argus argus</i>    | GXG1969  | Hap22  | If | 43.93 | 115.81 | China    | Jirigelangtu, Xilinhot City, Inner Mongolia  | OR019464 |
| <i>E. argus argus</i>    | GXG1970  | Hap198 | Ia | 43.93 | 115.81 | China    | Jirigelangtu, Xilinhot City, Inner Mongolia  | OR019465 |
| <i>E. argus argus</i>    | GXG1971  | Hap22  | If | 43.93 | 115.81 | China    | Jirigelangtu, Xilinhot City, Inner Mongolia  | OR019466 |
| <i>E. argus argus</i>    | GXG1972  | Hap199 | Ia | 43.93 | 115.81 | China    | Jirigelangtu, Xilinhot City, Inner Mongolia  | OR019467 |
| <i>E. argus argus</i>    | GXG1973  | Hap200 | Ic | 43.93 | 115.81 | China    | Jirigelangtu, Xilinhot City, Inner Mongolia  | OR019468 |
| <i>E. argus argus</i>    | GXG1974  | Hap199 | Ia | 43.93 | 115.81 | China    | Jirigelangtu, Xilinhot City, Inner Mongolia  | OR019469 |

|                       |         |        |     |       |        |       |                                                      |          |
|-----------------------|---------|--------|-----|-------|--------|-------|------------------------------------------------------|----------|
| <i>E. argus argus</i> | GXG1975 | Hap201 | Ia  | 43.93 | 115.81 | China | Jirigelangtu, Xilinhot City, Inner Mongolia          | OR019470 |
| <i>E. argus argus</i> | GXG1979 | Hap22  | If  | 43.93 | 115.81 | China | Jirigelangtu, Xilinhot City, Inner Mongolia          | OR019471 |
| <i>E. argus argus</i> | GXG1847 | Hap178 | Ia  | 43.95 | 114.72 | China | Arenwusu, Abaga Banner, Inner Mongolia               | OR019424 |
| <i>E. argus argus</i> | GXG2000 | Hap206 | Ia  | 43.95 | 114.72 | China | Arenwusu, Abaga Banner, Inner Mongolia               | OR019481 |
| <i>E. argus argus</i> | GXG2001 | Hap206 | Ia  | 43.95 | 114.72 | China | Arenwusu, Abaga Banner, Inner Mongolia               | OR019482 |
| <i>E. argus argus</i> | GXG2002 | Hap207 | Ia  | 43.95 | 114.72 | China | Arenwusu, Abaga Banner, Inner Mongolia               | OR019483 |
| <i>E. argus argus</i> | GXG1845 | Hap22  | If  | 43.95 | 114.72 | China | Arenwusu, Abaga Banner, Inner Mongolia               | OR019423 |
| <i>E. argus argus</i> | GXG1801 | Hap23  | Ia  | 44.2  | 115.92 | China | Talahutuge, Xilinhot City, Inner Mongolia            | OR019401 |
| <i>E. argus argus</i> | GXG1803 | Hap23  | Ia  | 44.2  | 115.92 | China | Talahutuge, Xilinhot City, Inner Mongolia            | OR019402 |
| <i>E. argus argus</i> | GXG1804 | Hap23  | Ia  | 44.2  | 115.92 | China | Talahutuge, Xilinhot City, Inner Mongolia            | OR019403 |
| <i>E. argus argus</i> | GXG1805 | Hap173 | IIb | 44.2  | 115.92 | China | Talahutuge, Xilinhot City, Inner Mongolia            | OR019404 |
| <i>E. argus argus</i> | GXG1806 | Hap174 | IIb | 44.2  | 115.92 | China | Talahutuge, Xilinhot City, Inner Mongolia            | OR019405 |
| <i>E. argus argus</i> | GXG1967 | Hap196 | Ia  | 44.52 | 114.23 | China | Narenbulage, Abaga Banner, Inner Mongolia            | OR019462 |
| <i>E. argus argus</i> | GXG1968 | Hap197 | Ia  | 44.52 | 114.23 | China | Narenbulage, Abaga Banner, Inner Mongolia            | OR019463 |
| <i>E. argus argus</i> | GXG1981 | Hap202 | Ia  | 44.52 | 114.23 | China | Narenbulage, Abaga Banner, Inner Mongolia            | OR019472 |
| <i>E. argus argus</i> | GXG1982 | Hap203 | Ic  | 44.52 | 114.23 | China | Narenbulage, Abaga Banner, Inner Mongolia            | OR019473 |
| <i>E. argus argus</i> | GXG1983 | Hap204 | Ic  | 44.52 | 114.23 | China | Narenbulage, Abaga Banner, Inner Mongolia            | OR019474 |
| <i>E. argus argus</i> | GXG1984 | Hap196 | Ia  | 44.52 | 114.23 | China | Narenbulage, Abaga Banner, Inner Mongolia            | OR019475 |
| <i>E. argus argus</i> | GXG1848 | Hap179 | Id  | 44.52 | 114.23 | China | Narenbulage, Abaga Banner, Inner Mongolia            | OR019425 |
| <i>E. argus argus</i> | GXG1807 | Hap23  | Ia  | 44.92 | 116.12 | China | East Ujimqin Banner, Inner Mongolia                  | OR019406 |
| <i>E. argus argus</i> | GXG1808 | Hap23  | Ia  | 44.92 | 116.12 | China | Saiyinwusugacha, East Ujimqin Banner, Inner Mongolia | OR019407 |
| <i>E. argus argus</i> | GXG1809 | Hap23  | Ia  | 44.92 | 116.12 | China | East Ujimqin Banner, Inner Mongolia                  | OR019408 |
| <i>E. argus argus</i> | GXG1810 | Hap23  | Ia  | 44.92 | 116.12 | China | East Ujimqin Banner, Inner Mongolia                  | OR019409 |
| <i>E. argus argus</i> | GXG1811 | Hap23  | Ia  | 44.92 | 116.12 | China | East Ujimqin Banner, Inner Mongolia                  | OR019410 |
| <i>E. argus argus</i> | GXG1812 | Hap23  | Ia  | 44.92 | 116.12 | China | East Ujimqin Banner, Inner Mongolia                  | OR019411 |
| <i>E. argus argus</i> | GXG1813 | Hap23  | Ia  | 44.92 | 116.12 | China | East Ujimqin Banner, Inner Mongolia                  | OR019412 |
| <i>E. argus argus</i> | GXG1814 | Hap23  | Ia  | 44.92 | 116.12 | China | East Ujimqin Banner, Inner Mongolia                  | OR019413 |

|                          |            |        |     |       |        |          |                                                    |          |
|--------------------------|------------|--------|-----|-------|--------|----------|----------------------------------------------------|----------|
| <i>E. argus argus</i>    | GXG1815    | Hap23  | Ia  | 44.92 | 116.12 | China    | East Ujimqin Banner, Inner Mongolia                | OR019414 |
| <i>E. argus argus</i>    | GXG1816    | Hap23  | Ia  | 44.92 | 116.12 | China    | East Ujimqin Banner, Inner Mongolia                | OR019415 |
| <i>E. argus barbouri</i> | Guo115     | Hap36  | Ia  | 45.58 | 126.22 | China    | Harbin Taiping International Airport, Heilongjiang | OR019149 |
| <i>E. argus argus</i>    | Guo116     | Hap37  | If  | 45.58 | 126.22 | China    | Harbin Taiping International Airport, Heilongjiang | OR019150 |
| <i>E. argus barbouri</i> | Guo117     | Hap38  | Ia  | 45.58 | 126.22 | China    | Harbin Taiping International Airport, Heilongjiang | OR019152 |
| <i>E. argus barbouri</i> | Guo118     | Hap36  | Ia  | 45.58 | 126.22 | China    | Harbin Taiping International Airport, Heilongjiang | OR019155 |
| <i>E. argus barbouri</i> | Guo119     | Hap39  | Ia  | 46.91 | 124.21 | China    | Keertai village, Dorbod County, Heilongjiang       | OR019157 |
| <i>E. argus argus</i>    | Guo120     | Hap39  | Ia  | 46.91 | 124.21 | China    | Keertai village, Dorbod County, Heilongjiang       | OR019158 |
| <i>E. argus argus</i>    | Guo123     | Hap40  | Ic  | 46.91 | 124.21 | China    | Keertai village, Dorbod County, Heilongjiang       | OR019160 |
| <i>E. argus barbouri</i> | EA7_HRB1   | Hap107 | IIb | 45.7  | 126.6  | China    | Harbin City, Heilongjiang                          | HM120761 |
| <i>E. argus barbouri</i> | EA28_HRB2  | Hap128 | Ia  | 45.7  | 126.6  | China    | Harbin City, Heilongjiang                          | HM120783 |
| <i>E. argus barbouri</i> | EA32_HRB3  | Hap131 | Ia  | 45.7  | 126.6  | China    | Harbin City, Heilongjiang                          | HM120783 |
| <i>E. argus barbouri</i> | EA38_HRB4  | Hap137 | Ia  | 45.7  | 126.6  | China    | Harbin City, Heilongjiang                          | HM120783 |
| <i>E. argus barbouri</i> | EA38_HRB5  | Hap137 | Ia  | 45.7  | 126.6  | China    | Harbin City, Heilongjiang                          | HM120783 |
| <i>E. argus barbouri</i> | EA38_HRB6  | Hap137 | Ia  | 45.7  | 126.6  | China    | Harbin City, Heilongjiang                          | HM120784 |
| <i>E. argus barbouri</i> | EA39_HRB7  | Hap37  | If  | 45.7  | 126.6  | China    | Harbin City, Heilongjiang                          | HM120786 |
| <i>E. argus barbouri</i> | EA39_HRB8  | Hap37  | If  | 45.7  | 126.6  | China    | Harbin City, Heilongjiang                          | HM120786 |
| <i>E. argus barbouri</i> | EA39_HRB9  | Hap37  | If  | 45.7  | 126.6  | China    | Harbin City, Heilongjiang                          | HM120786 |
| <i>E. argus barbouri</i> | EA40_HRB10 | Hap36  | Ia  | 45.7  | 126.6  | China    | Harbin City, Heilongjiang                          | HM120786 |
| <i>E. argus barbouri</i> | EA40_HRB11 | Hap36  | Ia  | 45.7  | 126.6  | China    | Harbin City, Heilongjiang                          | HM120787 |
| <i>E. argus barbouri</i> | EA40_HRB12 | Hap36  | Ia  | 45.7  | 126.6  | China    | Harbin City, Heilongjiang                          | HM120787 |
| <i>E. argus barbouri</i> | EA40_HRB13 | Hap36  | Ia  | 45.7  | 126.6  | China    | Harbin City, Heilongjiang                          | HM120788 |
| <i>E. argus barbouri</i> | EA41_HRB14 | Hap138 | Id  | 45.7  | 126.6  | China    | Harbin City, Heilongjiang                          | HM120788 |
| <i>E. argus barbouri</i> | Guo2919    | Hap265 | Ia  | 45.73 | 106.15 | Mongolia | Saintsagaan, Dundgovi                              | OR019291 |
| <i>E. argus barbouri</i> | Guo2908    | Hap85  | Ic  | 47.63 | 118.35 | Mongolia | Khalkhgol, Dornod                                  | OR019289 |
| <i>E. argus barbouri</i> | Guo2909    | Hap86  | Ic  | 47.63 | 118.35 | Mongolia | Khalkhgol, Dornod                                  | OR019290 |
| <i>E. argus barbouri</i> | CAS 238656 | Hap4   | Ib  | 47.78 | 104.39 | Mongolia | 6.5 air km SW of Bayannuur, Dashinchilen, Bulgan   | OR019120 |

|                          |            |       |     |       |        |          |                                                                         |          |
|--------------------------|------------|-------|-----|-------|--------|----------|-------------------------------------------------------------------------|----------|
| <i>E. argus barbouri</i> | CAS 238657 | Hap5  | Ia  | 47.78 | 104.39 | Mongolia | 6.5 air km SW of Bayannuur, Dashinchilen, Bulgan                        | OR019121 |
| <i>E. argus barbouri</i> | CAS 238658 | Hap6  | Ib  | 47.78 | 104.39 | Mongolia | 6.5 air km SW of Bayannuur, Dashinchilen, Bulgan                        | OR019122 |
| <i>E. argus barbouri</i> | CAS 238659 | Hap7  | Ib  | 47.78 | 104.39 | Mongolia | 6.5 air km SW of Bayannuur, Dashinchilen, Bulgan                        | OR019123 |
| <i>E. argus barbouri</i> | CAS 238660 | Hap8  | Ib  | 47.78 | 104.39 | Mongolia | 6.5 air km SW of Bayannuur, Dashinchilen, Bulgan                        | OR019124 |
| <i>E. argus barbouri</i> | CAS 238661 | Hap9  | Ia  | 47.78 | 104.39 | Mongolia | 6.5 air km SW of Bayannuur, Dashinchilen, Bulgan                        | OR019125 |
| <i>E. argus barbouri</i> | CAS 238663 | Hap10 | Ib  | 47.78 | 104.39 | Mongolia | 6.5 air km SW of Bayannuur, Dashinchilen, Bulgan                        | OR019126 |
| <i>E. argus barbouri</i> | CAS 238664 | Hap8  | Ib  | 47.78 | 104.39 | Mongolia | 6.5 air km SW of Bayannuur, Dashinchilen, Bulgan                        | OR019127 |
| <i>E. argus barbouri</i> | CAS 238665 | Hap11 | IIb | 47.78 | 104.39 | Mongolia | 6.5 air km SW of Bayannuur, Dashinchilen, Bulgan                        | OR019128 |
| <i>E. argus barbouri</i> | CAS 238666 | Hap12 | IIb | 47.78 | 104.39 | Mongolia | 6.5 air km SW of Bayannuur, Dashinchilen, Bulgan                        | OR019129 |
| <i>E. argus barbouri</i> | CAS 238667 | Hap8  | Ib  | 47.78 | 104.39 | Mongolia | 6.5 air km SW of Bayannuur, Dashinchilen, Bulgan                        | OR019130 |
| <i>E. argus barbouri</i> | CAS 238668 | Hap13 | IIb | 47.78 | 104.39 | Mongolia | 6.5 air km SW of Bayannuur, Dashinchilen, Bulgan                        | OR019131 |
| <i>E. argus barbouri</i> | CAS 238669 | Hap8  | Ib  | 47.78 | 104.39 | Mongolia | 6.5 air km SW of Bayannuur, Dashinchilen, Bulgan                        | OR019132 |
| <i>E. argus barbouri</i> | CAS 238670 | Hap4  | Ib  | 47.78 | 104.39 | Mongolia | 6.5 air km SW of Bayannuur, Dashinchilen, Bulgan                        | OR019133 |
| <i>E. argus barbouri</i> | CAS 238671 | Hap8  | Ib  | 47.78 | 104.39 | Mongolia | 6.5 air km SW of Bayannuur, Dashinchilen, Bulgan                        | OR019134 |
| <i>E. argus barbouri</i> | CAS 238672 | Hap14 | IIb | 47.65 | 104.36 | Mongolia | 23 air km SW of Bayannuur, Dashinchilen, Bulgan                         | OR019135 |
| <i>E. argus barbouri</i> | CAS 238673 | Hap8  | Ib  | 47.65 | 104.36 | Mongolia | 23 air km SW of Bayannuur, Dashinchilen, Bulgan                         | OR019136 |
| <i>E. argus barbouri</i> | CAS 238674 | Hap8  | Ib  | 47.65 | 104.36 | Mongolia | 23 air km SW of Bayannuur, Dashinchilen, Bulgan                         | OR019137 |
| <i>E. argus barbouri</i> | CAS 238675 | Hap15 | IIb | 47.65 | 104.36 | Mongolia | 23 air km SW of Bayannuur, Dashinchilen, Bulgan                         | OR019138 |
| <i>E. argus barbouri</i> | CAS 238676 | Hap8  | Ib  | 47.65 | 104.36 | Mongolia | 23 air km SW of Bayannuur, Dashinchilen, Bulgan                         | OR019139 |
| <i>E. argus barbouri</i> | CAS 238677 | Hap16 | IIb | 47.65 | 104.36 | Mongolia | 23 air km SW of Bayannuur, Dashinchilen, Bulgan                         | OR019140 |
| <i>E. argus barbouri</i> | CAS 238678 | Hap8  | Ib  | 47.65 | 104.36 | Mongolia | 23 air km SW of Bayannuur, Dashinchilen, Bulgan                         | OR019141 |
| <i>E. argus barbouri</i> | CAS 238679 | Hap17 | IIb | 47.65 | 104.36 | Mongolia | 23 air km SW of Bayannuur, Dashinchilen, Bulgan                         | OR019142 |
| <i>E. argus barbouri</i> | CAS 238680 | Hap18 | Id  | 47.65 | 104.36 | Mongolia | 23 air km SW of Bayannuur, Dashinchilen, Bulgan                         | OR019143 |
| <i>E. argus barbouri</i> | CAS 238681 | Hap8  | Ib  | 47.65 | 104.36 | Mongolia | 23 air km SW of Bayannuur, Dashinchilen, Bulgan                         | OR019144 |
| <i>E. argus argus</i>    | NM08015    | Hap26 | Ia  | 48.29 | 117.38 | China    | Ulan Nuoer Protection Station, New Barag West County,<br>Inner Mongolia | OR019580 |

|                          |         |       |    |       |        |          |                                                                            |          |
|--------------------------|---------|-------|----|-------|--------|----------|----------------------------------------------------------------------------|----------|
| <i>E. argus argus</i>    | N0011   | Hap27 | Ia | 48.59 | 117.27 | China    | Galada Baixin Protection Station, New Barag West County,<br>Inner Mongolia | OR019579 |
| <i>E. argus barbouri</i> | Guo9707 | Hap90 | Ic | 50.24 | 106.18 | Mongolia | Atlanbulag, Selenge                                                        | OR019365 |
| <i>E. argus barbouri</i> | Guo9708 | Hap91 | Ia | 50.24 | 106.18 | Mongolia | Atlanbulag, Selenge                                                        | OR019366 |
| <i>E. argus barbouri</i> | Guo9709 | Hap92 | Ia | 50.24 | 106.18 | Mongolia | Atlanbulag, Selenge                                                        | OR019367 |
| <i>E. argus barbouri</i> | Guo9710 | Hap8  | Ib | 50.24 | 106.18 | Mongolia | Atlanbulag, Selenge                                                        | OR019368 |
| <i>E. argus barbouri</i> | Guo9711 | Hap8  | Ib | 50.24 | 106.18 | Mongolia | Atlanbulag, Selenge                                                        | OR019369 |
| <i>E. argus barbouri</i> | Guo9712 | Hap8  | Ib | 50.24 | 106.18 | Mongolia | Atlanbulag, Selenge                                                        | OR019370 |
| <i>E. argus barbouri</i> | Guo9714 | Hap93 | Ia | 50.24 | 106.18 | Mongolia | Atlanbulag, Selenge                                                        | OR019371 |
| <i>E. argus barbouri</i> | Guo9715 | Hap94 | If | 50.24 | 106.18 | Mongolia | Atlanbulag, Selenge                                                        | OR019372 |
| <i>E. argus argus</i>    | Guo21   | Hap30 | If | 51.73 | 107.46 | Russia   | Ivolginsky District, Buryatia Republic                                     | OR019272 |
| <i>E. argus argus</i>    | Guo22   | Hap30 | If | 51.73 | 107.46 | Russia   | Ivolginsky District, Buryatia Republic,                                    | OR019273 |
| <i>E. argus argus</i>    | Guo23   | Hap8  | Ib | 51.73 | 107.46 | Russia   | Ivolginsky District, Buryatia Republic,                                    | OR019274 |
| <i>E. argus argus</i>    | Guo24   | Hap30 | If | 51.73 | 107.46 | Russia   | Ivolginsky District, Buryatia Republic,                                    | OR019275 |
| <i>E. argus argus</i>    | Guo25   | Hap30 | If | 51.55 | 107.36 | Russia   | Tarbagataysky District, Buryatia Republic                                  | OR019276 |
| <i>E. argus barbouri</i> | Guo26   | Hap31 | If | 51.55 | 107.36 | Russia   | Tarbagataysky District, Buryatia Republic                                  | OR019279 |
| <i>E. argus barbouri</i> | Guo27   | Hap30 | If | 51.55 | 107.36 | Russia   | Tarbagataysky District, Buryatia Republic                                  | OR019283 |
| <i>E. argus argus</i>    | Guo28   | Hap8  | Ib | 51.55 | 107.36 | Russia   | Tarbagataysky District, Buryatia Republic                                  | OR019287 |
| <i>E. argus argus</i>    | Guo29   | Hap8  | Ib | 51.55 | 107.36 | Russia   | Tarbagataysky District, Buryatia Republic                                  | OR019288 |
| <i>E. argus argus</i>    | Guo66   | Hap30 | If | 51.76 | 107.54 | Russia   | Tarbagataysky District, Buryatia Republic                                  | OR019311 |
| <i>E. argus argus</i>    | Guo67   | Hap32 | Ie | 51.76 | 107.54 | Russia   | Tarbagataysky District, Buryatia Republic                                  | OR019312 |
| <i>E. argus argus</i>    | Guo68   | Hap30 | If | 51.76 | 107.54 | Russia   | Tarbagataysky District, Buryatia Republic                                  | OR019314 |
| <i>E. argus argus</i>    | Guo69   | Hap30 | If | 51.76 | 107.54 | Russia   | Tarbagataysky District, Buryatia Republic                                  | OR019315 |
| <i>E. argus argus</i>    | Guo70   | Hap30 | If | 51.76 | 107.54 | Russia   | Tarbagataysky District, Buryatia Republic                                  | OR019316 |
| <i>E. argus argus</i>    | Guo71   | Hap30 | If | 51.76 | 107.54 | Russia   | Tarbagataysky District, Buryatia Republic                                  | OR019317 |
| <i>E. argus argus</i>    | Guo72   | Hap33 | Ie | 51.76 | 107.54 | Russia   | Tarbagataysky District, Buryatia Republic                                  | OR019318 |
| <i>E. argus argus</i>    | Guo73   | Hap30 | If | 51.76 | 107.54 | Russia   | Tarbagataysky District, Buryatia Republic                                  | OR019319 |

|                          |       |       |    |       |        |        |                                           |          |
|--------------------------|-------|-------|----|-------|--------|--------|-------------------------------------------|----------|
| <i>E. argus argus</i>    | Guo74 | Hap30 | If | 51.76 | 107.54 | Russia | Tarbagataysky District, Buryatia Republic | OR019320 |
| <i>E. argus argus</i>    | Guo75 | Hap30 | If | 51.76 | 107.54 | Russia | Tarbagataysky District, Buryatia Republic | OR019321 |
| <i>E. argus argus</i>    | Guo79 | Hap34 | Ie | 51.76 | 107.54 | Russia | Tarbagataysky District, Buryatia Republic | OR019331 |
| <i>E. argus argus</i>    | Guo76 | Hap30 | If | 51.76 | 107.54 | Russia | Tarbagataysky District, Buryatia Republic | OR019322 |
| <i>E. argus argus</i>    | Guo77 | Hap8  | Ib | 51.76 | 107.54 | Russia | Tarbagataysky District, Buryatia Republic | OR019323 |
| <i>E. argus barbouri</i> | Guo84 | Hap8  | Ib | 51.76 | 107.54 | Russia | Tarbagataysky District, Buryatia Republic | OR019347 |
| <i>E. argus barbouri</i> | Guo87 | Hap8  | Ib | 51.76 | 107.54 | Russia | Tarbagataysky District, Buryatia Republic | OR019348 |
| <i>E. argus barbouri</i> | Guo88 | Hap35 | Ia | 51.76 | 107.54 | Russia | Tarbagataysky District, Buryatia Republic | OR019349 |
| <i>E. argus argus</i>    | Guo89 | Hap8  | Ib | 51.76 | 107.54 | Russia | Tarbagataysky District, Buryatia Republic | OR019356 |
| <i>E. argus argus</i>    | Guo90 | Hap30 | If | 51.76 | 107.54 | Russia | Tarbagataysky District, Buryatia Republic | OR019362 |
| <i>E. argus argus</i>    | Guo91 | Hap30 | If | 51.76 | 107.54 | Russia | Tarbagataysky District, Buryatia Republic | OR019364 |

Sequences of GenBank accession numbers HM120761–HM120800 are from Zhao et al. [32], and their subspecies identity is assigned according to Zhao et al. [26].

## References

26. Zhao, E.M.; Zhao, K.T.; Zhou, K.Y. *Fauna Sinica, Reptilia (Squamata: Lacertilia)*; Volume 2; Science Press: Beijing, China, 1999. (In Chinese)
32. Zhao, Q.; Liu, H.X.; Luo, L.G.; Ji, X. Comparative population genetics and phylogeography of two lacertid lizards (*Eremias argus* and *E. brenchleyi*) from China. *Mol. Phylogenet. Evol.* **2011**, *58*, 478–491. <https://doi.org/10.1016/j.ympev.2010.12.017>.

**Table S2** Data on the phylogenetic, molecular dating, Bayesian phylogeographic diffusion and BSP analyses, including partitions, models and parameters.

| Analysis                                                                   | Dataset                                                                                 | Beast Model | Partition identity     | Length (bp) | Clock / Tree model   |
|----------------------------------------------------------------------------|-----------------------------------------------------------------------------------------|-------------|------------------------|-------------|----------------------|
| Phylogenetic tree (BI)<br>analysis of the haplotypes of<br><i>E. argus</i> | 282 haplotypes of <i>E. argus</i> , and three<br>outgroups                              | GTR+G       | cyt <i>b</i> 1st codon | 423         |                      |
|                                                                            |                                                                                         |             | cyt <i>b</i> 2nd codon | 423         |                      |
|                                                                            |                                                                                         |             | cyt <i>b</i> 3rd codon | 423         |                      |
| Phylogenetic tree (ML)<br>analysis of the haplotypes of<br><i>E. argus</i> | 282 haplotypes of <i>E. argus</i> , and three<br>outgroups                              | GTR+G       | cyt <i>b</i> 1st codon | 423         |                      |
|                                                                            |                                                                                         |             | cyt <i>b</i> 2nd codon | 423         |                      |
|                                                                            |                                                                                         |             | cyt <i>b</i> 3rd codon | 423         |                      |
| Molecular dating with<br>calibration points of<br>Lacertidae               | <i>Cytb</i> and 12S rRNA of<br>142 species involved 3<br>individuals of <i>E. argus</i> | GTR+I+G     | cyt <i>b</i> 1st codon | 1200        | Relaxed Uncorrelated |
|                                                                            |                                                                                         | GTR+I+G     | cyt <i>b</i> 2nd codon | 1200        | Lognormal Yule       |
|                                                                            |                                                                                         | GTR+I+G     | cyt <i>b</i> 3rd codon | 1200        | Random starting tree |
|                                                                            |                                                                                         | GTR+I+G     | 12S rRNA               | 1049        |                      |
| Molecular dating of<br>haplotypes within <i>E. argus</i>                   | 282 haplotypes of <i>E. argus</i>                                                       | GTR+G       | cyt <i>b</i> 1st codon | 423         | Relaxed Uncorrelated |
|                                                                            |                                                                                         | GTR+G       | cyt <i>b</i> 2nd codon | 423         | Lognormal/           |
|                                                                            |                                                                                         | GTR+G       | cyt <i>b</i> 3rd codon | 423         | Constant-size        |
| Molecular dating of sequence<br>within <i>E. argus</i>                     | 614 sequences of <i>E. argus</i>                                                        |             |                        |             | Coalescence          |
|                                                                            |                                                                                         |             |                        |             | Random starting tree |
|                                                                            |                                                                                         |             |                        |             | Relaxed Uncorrelated |
|                                                                            |                                                                                         |             |                        |             | Lognormal/           |
|                                                                            |                                                                                         | GTR+I+G     | cyt <i>b</i> 1st codon | 1041        | Constant-size        |
|                                                                            |                                                                                         | GTR+I+G     | cyt <i>b</i> 2nd codon | 1041        | Coalescence          |
|                                                                            |                                                                                         | GTR+G       | cyt <i>b</i> 3rd codon | 1041        | Random starting tree |
| BSP of Clade Ia                                                            | All sequences of Clade<br>Ia                                                            | GTR+I+G     | cyt <i>b</i> 1st codon | 1041        | Strict clock         |
|                                                                            |                                                                                         | GTR+I+G     | cyt <i>b</i> 2nd codon | 1041        | Coalescent: Bayesian |
|                                                                            |                                                                                         | GTR+G       | cyt <i>b</i> 3rd codon | 1041        | Skyline Plot         |

|                  |                            |         |                        |      |                      |
|------------------|----------------------------|---------|------------------------|------|----------------------|
|                  |                            |         |                        |      | Random starting tree |
|                  |                            |         |                        |      | Piecewise constant   |
| BSP of Clade Ib  | All sequences of Clade Ib  | GTR     | cyt <i>b</i> 1st codon | 1041 | Strict clock         |
|                  |                            | GTR     | cyt <i>b</i> 2nd codon | 1041 | Coalescent: Bayesian |
|                  |                            | GTR     | cyt <i>b</i> 3rd codon | 1041 | Skyline Plot         |
|                  |                            |         |                        |      |                      |
|                  |                            |         |                        |      | Piecewise liner      |
| BSP of Clade Ic  | All sequences of Clade Ic  | GTR+G   | cyt <i>b</i> 1st codon | 1041 | Coalescent: Bayesian |
|                  |                            | GTR+G   | cyt <i>b</i> 2nd codon | 1041 | Skyline Plot         |
|                  |                            | GTR     | cyt <i>b</i> 3rd codon | 1041 | Random starting tree |
|                  |                            |         |                        |      |                      |
| BSP of Clade Id  | All sequences of Clade Id  | GTR+G   | cyt <i>b</i> 1st codon | 1041 | Coalescent: Bayesian |
|                  |                            | GTR+G   | cyt <i>b</i> 2nd codon | 1041 | Skyline Plot         |
|                  |                            | GTR+G   | cyt <i>b</i> 3rd codon | 1041 | Random starting tree |
|                  |                            |         |                        |      |                      |
| BSP of Clade Ie  | All sequences of Clade Ie  | GTR+G   | cyt <i>b</i> 1st codon | 1041 | Coalescent: Bayesian |
|                  |                            | GTR+G   | cyt <i>b</i> 2nd codon | 1041 | Skyline Plot         |
|                  |                            | GTR+G   | cyt <i>b</i> 3rd codon | 1041 | Random starting tree |
|                  |                            |         |                        |      |                      |
| BSP of Clade If  | All sequences of Clade If  | GTR+G   | cyt <i>b</i> 1st codon | 1041 | Coalescent: Bayesian |
|                  |                            | GTR+G   | cyt <i>b</i> 2nd codon | 1041 | Skyline Plot         |
|                  |                            | GTR+G   | cyt <i>b</i> 3rd codon | 1041 | Random starting tree |
|                  |                            |         |                        |      |                      |
| BSP of Clade IIa | All sequences of Clade IIa | GTR+I+G | cyt <i>b</i> 1st codon | 1041 | Coalescent: Bayesian |
|                  |                            | GTR+I+G | cyt <i>b</i> 2nd codon | 1041 | Skyline Plot         |



|                                                          |                                     |       |                        |      |                      |
|----------------------------------------------------------|-------------------------------------|-------|------------------------|------|----------------------|
| Phylogeographic diffusion<br>analysis of <i>E. argus</i> | Sequences of different<br>locations | GTR+G | cyt <i>b</i> 3rd codon | 1041 | Random starting tree |
|                                                          |                                     |       |                        |      | Piecewise constant   |
|                                                          |                                     | GTR+G | cyt <i>b</i> 1st codon | 1041 | Gamma relaxed random |
|                                                          |                                     | GTR+G | cyt <i>b</i> 2nd codon | 1041 | walk model           |
|                                                          |                                     | GTR+G | cyt <i>b</i> 3rd codon | 1041 |                      |

**Table S3** Sequences of lacertid species (Lacertidae) and three outgroups retrieved from GenBank

| Taxon                             | Family         | Subfamily  | GenBank accession number |          | Reference                        |
|-----------------------------------|----------------|------------|--------------------------|----------|----------------------------------|
|                                   |                |            | cyt <i>b</i>             | 12S rRNA |                                  |
| <i>Acanthodactylus aureus</i>     | Lacertidae     | Eremiinae  | MW496121                 | MW496121 | [110]                            |
| <i>Acanthodactylus boskianus</i>  | Lacertidae     | Eremiinae  | MW496112                 | MW496112 | [110]                            |
| <i>Acanthodactylus erythrurus</i> | Lacertidae     | Eremiinae  | MW496113                 | MW496113 | [110]                            |
| <i>Acanthodactylus guineensis</i> | Lacertidae     | Eremiinae  | MW496123                 | MW496123 | [110]                            |
| <i>Acanthodactylus schmidtii</i>  | Lacertidae     | Eremiinae  | MW496124                 | MW496124 | [110]                            |
| <i>Adolfus jacksoni</i>           | Lacertidae     | Eremiinae  | AF206539                 | AF080387 | [111]; [112]                     |
| <i>Algyroides fitzingeri</i>      | Lacertidae     | Lacertinae | MN015168                 | AF206598 | [113]; [111]                     |
| <i>Algyroides marchi</i>          | Lacertidae     | Lacertinae | GQ142133                 | GQ142080 | [49]                             |
| <i>Algyroides moreoticus</i>      | Lacertidae     | Lacertinae | GQ142131                 | GQ142079 | [49]                             |
| <i>Algyroides nigropunctatus</i>  | Lacertidae     | Lacertinae | MW496122                 | MW496122 | [110]                            |
| <i>Amphisbaena schmidtii</i>      | Amphisbaenidae | N/A        | AY605475                 | AY605475 | [114]                            |
| <i>Anatololacerta anatolica</i>   | Lacertidae     | Lacertinae | GQ142138                 | GQ142086 | [49]                             |
| <i>Apathya cappadocica</i>        | Lacertidae     | Lacertinae | MN015129                 | GQ142076 | [113]; [49]                      |
| <i>Archaeolacerta bedriagae</i>   | Lacertidae     | Lacertinae | MN015130                 | AF440599 | [113]; [115]                     |
| <i>Atlantolacerta andreanskyi</i> | Lacertidae     | Eremiinae  | MN015162                 | GQ142070 | [113]; [49]                      |
| <i>Australolacerta australis</i>  | Lacertidae     | Eremiinae  | MW496118                 | MW496118 | [110]                            |
| <i>Bipes biporus</i>              | Bipedidae      | N/A        | AY605481                 | AY605481 | [114]                            |
| <i>Dalmatolacerta oxycephala</i>  | Lacertidae     | Lacertinae | MN015132                 | KX080609 | [113]; [116]                     |
| <i>Darevskia armeniaca</i>        | Lacertidae     | Lacertinae | MG704915                 | MG704915 | [117]                            |
| <i>Darevskia braueri</i>          | Lacertidae     | Lacertinae | MH481137                 | MH481137 | [117]                            |
| <i>Darevskia caucasica</i>        | Lacertidae     | Lacertinae | MH481131                 | MH481131 | [117]                            |
| <i>Darevskia chlorogaster</i>     | Lacertidae     | Lacertinae | MH481136                 | MH481136 | [117]                            |
| <i>Darevskia clarkorum</i>        | Lacertidae     | Lacertinae | MH481134                 | MH481134 | [117]                            |
| <i>Darevskia daghestanica</i>     | Lacertidae     | Lacertinae | MG704916                 | MG704916 | [117]                            |
| <i>Darevskia dahlia</i>           | Lacertidae     | Lacertinae | MH481135                 | MH481135 | [117]                            |
| <i>Darevskia derjugini</i>        | Lacertidae     | Lacertinae | MH481130                 | MH481130 | [117]                            |
| <i>Darevskia mixta</i>            | Lacertidae     | Lacertinae | MG704917                 | MG704917 | [117]                            |
| <i>Darevskia parvula</i>          | Lacertidae     | Lacertinae | MG704918                 | MG704918 | [117]                            |
| <i>Darevskia portschinskii</i>    | Lacertidae     | Lacertinae | MG704919                 | MG704919 | [117]                            |
| <i>Darevskia praticola</i>        | Lacertidae     | Lacertinae | MH481132                 | MH481132 | [117]                            |
| <i>Darevskia raddei</i>           | Lacertidae     | Lacertinae | MH481133                 | MH481133 | [117]                            |
| <i>Darevskia rudis</i>            | Lacertidae     | Lacertinae | MG704920                 | MG704920 | [117]                            |
| <i>Darevskia saxicola</i>         | Lacertidae     | Lacertinae | MG704921                 | MG704921 | [117]                            |
| <i>Darevskia unisexualis</i>      | Lacertidae     | Lacertinae | KX644918                 | KX644918 | [118]                            |
| <i>Darevskia valentini</i>        | Lacertidae     | Lacertinae | MG655240                 | MG655240 | [117]                            |
| <i>Dinarolacerta montenegrina</i> | Lacertidae     | Lacertinae | GQ142141                 | GQ142078 | [49]                             |
| <i>Dinarolacerta mosorensis</i>   | Lacertidae     | Lacertinae | MN015187                 | KX080570 | [113]; [116]                     |
| <i>Eremias argus</i>              | Lacertidae     | Eremiinae  | JQ086345                 | JQ086345 | Kim <i>et al.</i> (Unpubl. data) |
| <i>Eremias arguta</i>             | Lacertidae     | Eremiinae  | KU605241                 | KU605241 | Yu and Lin (Unpubl. data)        |
| <i>Eremias brenchleyi</i>         | Lacertidae     | Eremiinae  | EF490071                 | EF490071 | [119]                            |
| <i>Eremias dzungarica</i>         | Lacertidae     | Eremiinae  | MW250881                 | MW250881 | [120]                            |
| <i>Eremias grammica</i>           | Lacertidae     | Eremiinae  | KU585904                 | KU585904 | Yu and Lin (Unpubl. data)        |
| <i>Eremias multiocellata</i>      | Lacertidae     | Eremiinae  | MK261077                 | MK261077 | [121]                            |

|                                     |                |             |          |          |                                |
|-------------------------------------|----------------|-------------|----------|----------|--------------------------------|
| <i>Eremias nikolskii</i>            | Lacertidae     | Eremiinae   | OK587334 | OK587334 | [122]                          |
| <i>Eremias persica</i>              | Lacertidae     | Eremiinae   | MT554453 | FJ445258 | [123];[124]                    |
| <i>Eremias przewalskii</i>          | Lacertidae     | Eremiinae   | KM507330 | KM507330 | [125]                          |
| <i>Eremias strauchi strauchi</i>    | Lacertidae     | Eremiinae   | JQ690099 | JQ690168 | [126]                          |
| <i>Eremias stummeri</i>             | Lacertidae     | Eremiinae   | KT372881 | KT372881 | [127]                          |
| <i>Eremias szczerbaki</i>           | Lacertidae     | Eremiinae   | OL457296 | OL457296 | [128]                          |
| <i>Eremias velox</i>                | Lacertidae     | Eremiinae   | KM359148 | KM359148 | [127]                          |
| <i>Eremias vermiculata</i>          | Lacertidae     | Eremiinae   | KM104865 | KM104865 | [129]                          |
| <i>Eremias yarkandensis</i>         | Lacertidae     | Eremiinae   | OK585048 | OK585048 | [130]                          |
| <i>Gallotia atlantica</i>           | Lacertidae     | Gallotiinae | MW496111 | MW496111 | [110]                          |
| <i>Gallotia caesaris caesaris</i>   | Lacertidae     | Gallotiinae | AF439948 | AF439943 | [131]                          |
| <i>Gallotia caesaris gomeræ</i>     | Lacertidae     | Gallotiinae | AY151842 | AY151921 | [132]                          |
| <i>Gallotia galloti eisentrauti</i> | Lacertidae     | Gallotiinae | AM489583 | AF439942 | Hernandez (Unpub. Data); [131] |
| <i>Gallotia galloti galloti</i>     | Lacertidae     | Gallotiinae | AM489592 | AY151919 | Hernandez (Unpub. Data); [132] |
| <i>Gallotia galloti palmarum</i>    | Lacertidae     | Gallotiinae | AF439946 | AF439941 | [131]                          |
| <i>Gallotia intermedia</i>          | Lacertidae     | Gallotiinae | AY151844 | AY151923 | [132]                          |
| <i>Gallotia simonyi machadoi</i>    | Lacertidae     | Gallotiinae | AF101219 | AY151924 | [132,133]                      |
| <i>Gallotia stehlini</i>            | Lacertidae     | Gallotiinae | MN015165 | AF439944 | [113]; [131]                   |
| <i>Gerrhosaurus nigrolineatus</i>   | Gerrhosauridae | Gallotiinae | EU116512 | HQ167134 | [134,135]                      |
| <i>Heliobolus lugubris</i>          | Lacertidae     | Eremiinae   | JX962945 | JX962890 | [136]                          |
| <i>Heliobolus speki</i>             | Lacertidae     | Eremiinae   | AF206544 | AF042550 | [111]; [112]                   |
| <i>Hellenolacerta graeca</i>        | Lacertidae     | Lacertinae  | MN015180 | GQ142077 | [113]; [49]                    |
| <i>Iberolacerta aranica</i>         | Lacertidae     | Lacertinae  | MN015141 | AF440596 | [113]; [115]                   |
| <i>Iberolacerta aurelioi</i>        | Lacertidae     | Lacertinae  | MN015164 | AF440595 | [113]; [115]                   |
| <i>Iberolacerta bonnali</i>         | Lacertidae     | Lacertinae  | MN015147 | AF440598 | [113]; [115]                   |
| <i>Iberolacerta cyreni</i>          | Lacertidae     | Lacertinae  | MN015184 | AF440592 | [113]; [115]                   |
| <i>Iberolacerta galani</i>          | Lacertidae     | Lacertinae  | MN015193 | DQ497130 | [113]; [137]                   |
| <i>Iberolacerta horvathi</i>        | Lacertidae     | Lacertinae  | MN015190 | AY256653 | [113]; [137]                   |
| <i>Iberolacerta monticola</i>       | Lacertidae     | Lacertinae  | MN015138 | AF440590 | [113]; [115]                   |
| <i>Ichnotropis capensis</i>         | Lacertidae     | Eremiinae   | MN015176 | JX962877 | [113]; [136]                   |
| <i>Iranolacerta brandtii</i>        | Lacertidae     | Lacertinae  | MN015199 | GQ142088 | [113]; [49]                    |
| <i>Lacerta agilis</i>               | Lacertidae     | Lacertinae  | KC990830 | KC990830 | [138]                          |
| <i>Lacerta bilineata</i>            | Lacertidae     | Lacertinae  | KT722705 | KT722705 | [139]                          |
| <i>Lacerta schreiberi</i>           | Lacertidae     | Lacertinae  | AF206591 | MN015139 | [111]; [113]                   |
| <i>Lacerta strigata</i>             | Lacertidae     | Lacertinae  | MW592672 | DQ097094 | [140]; [141]                   |
| <i>Lacerta trilineata</i>           | Lacertidae     | Lacertinae  | MN015167 | AJ238177 | [113]; [142]                   |
| <i>Lacerta viridis viridis</i>      | Lacertidae     | Lacertinae  | AM176577 | AM176577 | [143]                          |
| <i>Latastia longicaudata</i>        | Lacertidae     | Eremiinae   | JX962946 | JX962891 | [136]                          |
| <i>Merolus cuneirostris</i>         | Lacertidae     | Eremiinae   | JX962929 | JX962874 | [136]                          |
| <i>Merolus knoxii</i>               | Lacertidae     | Eremiinae   | JX962928 | JX962873 | [136]                          |
| <i>Merolus squamulosus</i>          | Lacertidae     | Eremiinae   | MW496120 | MW496120 | [110]                          |
| <i>Merolus suborbitalis</i>         | Lacertidae     | Eremiinae   | JX962927 | JX962871 | [136]                          |
| <i>Mesalina brevirostris</i>        | Lacertidae     | Eremiinae   | AF206606 | FJ416173 | [111]; [124]                   |
| <i>Mesalina olivieri</i>            | Lacertidae     | Eremiinae   | MW496114 | MW496114 | [110]                          |
| <i>Nucras lalandii</i>              | Lacertidae     | Eremiinae   | JX962944 | JX962889 | [136]                          |
| <i>Nucras tessellata</i>            | Lacertidae     | Eremiinae   | AF206612 | MW823898 | [111]; [144]                   |

|                                   |            |             |          |          |              |
|-----------------------------------|------------|-------------|----------|----------|--------------|
| <i>Opisops elegans</i>            | Lacertidae | Eremiinae   | GQ142116 | GQ142069 | [49]         |
| <i>Parvilacerta parva</i>         | Lacertidae | Lacertinae  | GQ142135 | GQ142082 | [49]         |
| <i>Pedioplanis gaerdesi</i>       | Lacertidae | Eremiinae   | MW823691 | AY192434 | [144]; [145] |
| <i>Pedioplanis inornata</i>       | Lacertidae | Eremiinae   | MW823830 | AY192435 | [144]; [145] |
| <i>Pedioplanis laticeps</i>       | Lacertidae | Eremiinae   | MW496119 | MW496119 | [110]        |
| <i>Pedioplanis lineocellata</i>   | Lacertidae | Eremiinae   | JX962943 | JX962888 | [136]        |
| <i>Pedioplanis undata</i>         | Lacertidae | Eremiinae   | JX962942 | AF042549 | [136]; [112] |
| <i>Phoenicolacerta kulzeri</i>    | Lacertidae | Lacertinae  | FJ460596 | FJ460596 | [146]        |
| <i>Phoenicolacerta laevis</i>     | Lacertidae | Lacertinae  | MN015197 | KR082613 | [113]; [147] |
| <i>Podarcis bocagei</i>           | Lacertidae | Lacertinae  | MN015135 | AJ250168 | [113]; [148] |
| <i>Podarcis carbonelli</i>        | Lacertidae | Lacertinae  | MN015143 | AF469418 | [113]; [149] |
| <i>Podarcis erhardii</i>          | Lacertidae | Lacertinae  | AF486218 | MW619230 | [150]; [151] |
| <i>Podarcis filfolensis</i>       | Lacertidae | Lacertinae  | MN015146 | AJ001464 | [113]; [151] |
| <i>Podarcis lilfordi</i>          | Lacertidae | Lacertinae  | AM747719 | AJ250159 | [153]; [148] |
| <i>Podarcis liolepis</i>          | Lacertidae | Lacertinae  | MN015188 | KT030702 | [113]; [154] |
| <i>Podarcis melisellensis</i>     | Lacertidae | Lacertinae  | MT010548 | AY185002 | [155]; [156] |
| <i>Podarcis milensis</i>          | Lacertidae | Lacertinae  | MN015166 | MW619252 | [113]; [151] |
| <i>Podarcis muralis</i>           | Lacertidae | Lacertinae  | FJ460597 | FJ460597 | [146]        |
| <i>Podarcis pityusensis</i>       | Lacertidae | Lacertinae  | JX852048 | AJ250158 | [157]; [148] |
| <i>Podarcis siculus</i>           | Lacertidae | Lacertinae  | FJ460598 | FJ460598 | [146]        |
| <i>Podarcis tauricus</i>          | Lacertidae | Lacertinae  | ON155608 | MW619273 | [158]; [151] |
| <i>Podarcis tiliguerta</i>        | Lacertidae | Lacertinae  | MN015144 | AJ001479 | [113]; [148] |
| <i>Podarcis waglerianus</i>       | Lacertidae | Lacertinae  | MN015189 | AJ001466 | [113]; [152] |
| <i>Psammodromus algeris</i>       | Lacertidae | Gallotiinae | MW496117 | MW496117 | [110]        |
| <i>Scelarcis perspicillata</i>    | Lacertidae | Lacertinae  | MN015156 | GQ142074 | [113]; [49]  |
| <i>Takydromus amurensis</i>       | Lacertidae | Lacertinae  | KU641018 | KU641018 | [159]        |
| <i>Takydromus formosanus</i>      | Lacertidae | Lacertinae  | KM487175 | AY248532 | [50]; [160]  |
| <i>Takydromus hsuehshanensis</i>  | Lacertidae | Lacertinae  | AF217051 | AY248483 | [161]; [160] |
| <i>Takydromus intermedius</i>     | Lacertidae | Lacertinae  | MN239958 | AY032597 | [162]; [161] |
| <i>Takydromus kuehnei</i>         | Lacertidae | Lacertinae  | MZ435950 | MZ435950 | [163]        |
| <i>Takydromus septentrionalis</i> | Lacertidae | Lacertinae  | MK630237 | MK630237 | [164]        |
| <i>Takydromus sexlineatus</i>     | Lacertidae | Lacertinae  | KF425529 | KF425529 | [165]        |
| <i>Takydromus stejnegeri</i>      | Lacertidae | Lacertinae  | AF217072 | AY248477 | [161]; [160] |
| <i>Takydromus sylvaticus</i>      | Lacertidae | Lacertinae  | JX290083 | JX290083 | [166]        |
| <i>Takydromus tachydromoides</i>  | Lacertidae | Lacertinae  | AB080237 | AB080237 | [166]        |
| <i>Takydromus wolteri</i>         | Lacertidae | Lacertinae  | JX181764 | JX181764 | [167]        |
| <i>Teira dugesii</i>              | Lacertidae | Lacertinae  | MN015169 | KP668869 | [113]; [168] |
| <i>Timon lepidus</i>              | Lacertidae | Lacertinae  | MN015137 | GQ142071 | [113]; [49]  |
| <i>Timon princeps</i>             | Lacertidae | Lacertinae  | MN015170 | JQ425790 | [113]; [169] |
| <i>Tropidosaura cottrelli</i>     | Lacertidae | Eremiinae   | JX962939 | JX962884 | [136]        |
| <i>Tropidosaura essexi</i>        | Lacertidae | Eremiinae   | JX962938 | JX962883 | [136]        |
| <i>Tropidosaura gularis</i>       | Lacertidae | Eremiinae   | JX962933 | AF080371 | [136];       |
| <i>Tropidosaura montana</i>       | Lacertidae | Eremiinae   | JX962935 | JX962881 | [136]        |
| <i>Zootoca vivipara</i>           | Lacertidae | Lacertinae  | KM401599 | KM401599 | [170]        |

## References

49. Pavlicev, M.; Mayer, W. Fast radiation of the subfamily Lacertinae (Reptilia: Lacertidae): History or methodical artefact? *Mol. Phylogenet. Evol.* **2009**, *52*, 727–734. <https://doi.org/10.1016/j.ympev.2009.04.020>.
50. Tseng, S.P.; Li, S.H.; Hsieh, C.H.; Wang, H.Y.; Lin, S.M. Influence of gene flow on divergence dating-implications for the speciation history of *Takydromus* grass lizards. *Mol. Ecol.* **2014**, *23*, 4770–4784. <https://doi.org/10.1111/mec.12889>.
110. Kirchhof, S.; Lyra, M.L.; Rodriguez, A.; Ineich, I.; Müller, J.; Rödel, M.O.; Trape, J.F.; Vences, M.; Boissinot, S. Mitogenome analyses elucidate the evolutionary relationships of a probable Eocene wet tropics relic in the xerophile lizard genus *Acanthodactylus*. *Sci. Rep.* **2021**, *11*, 4858. <https://doi.org/10.1038/s41598-021-83422-7>.
111. Fu, J. Toward the phylogeny of the family Lacertidae—why 4708 base pairs of mtDNA sequences cannot draw the picture. *Biol. J. Linn. Soc.* **2000**, *71*, 203–217. <https://doi.org/10.1111/j.1095-8312.2000.tb01254.x>.
112. Harris, D.J.; Arnold, E.N.; Thomas, R.H. Relationships of lacertid lizards (Reptilia: Lacertidae) estimated from mitochondrial DNA sequences and morphology. *Proc. Biol. Sci.* **1998**, *265*, 1939–1948. <https://doi.org/10.1098/rspb.1998.0524>.
113. Garcia-Porta, J.; Irisarri, I.; Kirchner, M.; Rodríguez, A.; Kirchhof, S.; Brown, J.L.; MacLeod, A.; Turner, A.P.; Ahmadzadeh, F.; Albaladejo, G.; et al. Environmental temperatures shape thermal physiology as well as diversification and genome-wide substitution rates in lizards. *Nat. Commun.* **2019**, *10*, 4077. <https://doi.org/10.1038/s41467-019-11943-x>.
114. Macey, J.R.; Papenfuss, T.J.; Kuehl, J.V.; Fourcade, H.M.; Boore, J.L. Phylogenetic relationships among amphisbaenian reptiles based on complete mitochondrial genomic sequences. *Mol. Phylogenet. Evol.* **2004**, *33*, 22–31. <https://doi.org/10.1016/j.ympev.2004.05.003>.
115. Mayer, W.; Arribas, O. Phylogenetic relationships of the European lacertid genera *Archaeolacerta* and *Iberolacerta* and their relationships to some other ‘Archaeolacertae’ (*sensu lato*) from Near East, derived from mitochondrial DNA sequences. *J. Zool. Syst. Evol. Res.* **2003**, *41*, 157–161. <https://doi.org/10.1046/j.1439-0469.2003.00223.x>.
116. Mendes, J.; Harris, D.J.; Carranza, S.; Salvi, D. Evaluating the phylogenetic signal limit from mitogenomes, slow evolving nuclear genes, and the concatenation approach. New insights into the Lacertini radiation using fast evolving nuclear genes and species trees. *Mol. Phylogenet. Evol.* **2016**, *100*, 254–267. <https://doi.org/10.1016/j.ympev.2016.04.016>.
117. Murtskhvaladze, M.; Tarkhnishvili, D.; Anderson, C.L.; Kotorashvili, A. Phylogeny of caucasian rock lizards (*Darevskia*) and other true lizards based on mitogenome analysis: Optimisation of the algorithms and gene selection. *PLoS One* **2020**, *15*, e0233680. <https://doi.org/10.1371/journal.pone.0233680>.
118. Komissarov, A.; Korchagin, V.; Kliver, S.; Dobrynin, P.; Semyanova, S.; Vergun, A.; O'Brien, S.; Ryskov, A. The complete mitochondrial genome of the parthenogenetic Caucasian rock lizard *Darevskia unisexualis* (Squamata: Lacertidae) contains long tandem repeat formed by 59 bp monomer. *Mitochondrial DNA B* **2016**, *1*, 875–877. <https://doi.org/10.1080/23802359.2016.1253040>.
119. Rui, J.L.; Wang, Y.T.; Nie, L.W. The complete mitochondrial DNA genome of *Eremias brenchleyi* (Reptilia: Lacertidae) and its phylogeny position within Squamata reptiles. *Amphib-Reptil.* **2009**, *30*, 25–35. <https://doi.org/10.1163/156853809787392793>.
120. Wang, S.; Liu, J.; Zhang, B.; Guo, X. The complete mitochondrial genome of *Eremias dzungarica* (Reptilia, Squamata, Lacertidae) from the Junggar Basin in Northwest China. *Mitochondrial DNA B* **2021**, *6*, 2012–2014. <https://doi.org/10.1080/23802359.2021.1923417>.
121. Su, X.; Liu, J.; Chen, D.; Guo, X. Next-generation sequencing yields a nearly complete mitochondrial genome of the multiocellated racerunner (*Eremias multiocellata*) in Northwest China. *Mitochondrial DNA B* **2019**, *4*, 1430–1431. <https://doi.org/10.1080/23802359.2019.1598810>.
122. Guo, X.; Huo, X.; Liu, J.; Chirikova, M.A. Complete mitochondrial genome of the Kyrgyz racerunner (*Eremias nikolskii* Bedriaga, 1905) from Kyrgyzstan. *Mitochondrial DNA B* **2022**, *7*, 983–985. <https://doi.org/10.1080/23802359.2022.2080599>.
123. Khan, M.A.; Jablonski, D.; Nadeem, M.S.; Masroor, R.; Kehlmaier, C.; Spitzweg, C.; Fritz, U. Molecular phylogeny of *Eremias* spp. from Pakistan contributes to a better understanding of the diversity of racerunners. *J. Zool. Syst. Evol. Res.* **2021**, *59*, 466–483. <https://doi.org/10.1111/jzs.12426>.
124. Pouyani, E.R.; Pouyani, N.R.; Noreini, S.K.; Joger, U.; Wink, M. Molecular phylogeny of the *Eremias persica* complex of the Iranian plateau (Reptilia: Lacertidae), based on mtDNA sequences. *Zool. J. Linn. Soc.* **2010**, *158*, 641–660. <https://doi.org/10.1111/j.1096-3642.2009.00553.x>.
125. Du, Y.; Qiu, Q.B.; Tong, Q.L.; Lin, L.H. The complete mitochondrial genome of *Eremias przewalskii* (Squamata: Lacertidae). *Mitochondrial DNA A* **2016**, *27*, 1918–1919. <https://doi.org/10.3109/19401736.2014.971286>.
126. Pouyani, E.R.; Noreini, S.K.; Pouyani, N.R.; Joger, U.; Wink, M. Molecular phylogeny and intraspecific differentiation of the *Eremias velox* complex of the Iranian plateau and Central Asia (Sauria, Lacertidae). *J. Zool. Syst. Evol. Res.* **2012**, *50*, 220–229. <https://doi.org/10.1111/j.1439-0469.2012.00662.x>.
127. Zhou, T.; Li, D.; Dujsebayeva, T.N.; Liu, J.; Guo, X. Complete mitochondrial genome of Stummer’s racerunner (*Eremias stummeri*) from Kazakhstan. *Mitochondrial DNA A* **2016**, *27*, 4340–4341. <https://doi.org/10.3109/19401736.2015.1089491>.

128. Tian, L.L.; Guo, X.G. Complete mitochondrial genomes of five racerunners (Lacertidae: *Eremias*) and comparison with other lacertids: Insights into the structure and evolution of the control region. *Genes* **2022**, *13*, 726. <https://doi.org/10.3390/genes13050726>.
129. Tong, Q.L.; Yao, Y.T.; Lin, L.H.; Ji, X. The complete mitochondrial genome of *Eremias vermiculata* (Squamata: Lacertidae). *Mitochondrial DNA A* **2016**, *27*, 1447–1448. <https://doi.org/10.3109/19401736.2014.953086>.
130. Wang, S.; Liu, J.; Chirikova, M.A.; Zhang, B.; Guo, X. The complete mitochondrial genome of *Eremias yarkandensis* (Reptilia, Squamata, Lacertidae) from Kyrgyzstan. *Mitochondrial DNA B* **2022**, *7*, 443–445. <https://doi.org/10.1080/23802359.2022.2047119>.
131. Maca-Meyer, N.; Carranza, S.; Rando, J.C.; Arnold, E.N.; Cabrera, V.M. Status and relationships of the extinct giant Canary Island lizard *Gallotia goliath* (Reptilia: Lacertidae), assessed using ancient mtDNA from its mummified remains. *Biol. J. Linn. Soc.* **2003**, *80*, 659–670. <https://doi.org/10.1111/j.1095-8312.2003.00265.x>.
132. Carranza, S.; Arnold, E.N.; Amat, F. DNA phylogeny of *Lacerta (Iberolacerta)* and other lacertine lizards (Reptilia: Lacertidae): did competition cause long-term mountain restriction? *Syst. Biodivers.* **2004**, *2*, 57–77. <https://doi.org/10.1017/S1477200004001355>.
133. Carranza, S.; Arnold, E.N.; Thomas, R.H.; López-Jurado, L.F. Status of the extinct giant lacertid lizard *Gallotia simonyi simonyi* (Reptilia: Lacertidae) assessed using mtDNA sequences from museum specimens. *Herpetol. J.* **1999**, *9*, 83–86.
134. Noonan, B.P.; Pramuk, J.B.; Bezy, R.L.; Sinclair, E.A.; de Queiroz, K.; Sites Jr, J.W. Phylogenetic relationships within the lizard clade Xantusiidae: Using trees and divergence times to address evolutionary questions at multiple levels. *Mol. Phylogenet. Evol.* **2013**, *69*, 109–122. <https://doi.org/10.1016/j.ympev.2013.05.017>.
135. Stanley, E.L.; Bauer, A.M.; Jackman, T.R.; Branch, W.R.; Mouton, P.L.F.N. Between a rock and a hard polytomy: rapid radiation in the rupicolous girdled lizards (Squamata: Cordylidae). *Mol. Phylogenet. Evol.* **2011**, *58*, 53–70. <https://doi.org/10.1016/j.ympev.2010.08.024>.
136. Engleder, A.; Haring, E.; Kirchhof, S.; Mayer, W. Multiple nuclear and mitochondrial DNA sequences provide new insights into the phylogeny of South African Lacertids (Lacertidae, Eremiadinae). *J. Zool. Syst. Evol. Res.* **2013**, *51*, 132–143. <https://doi.org/10.1111/jzs.12012>.
137. Arribas, O.; Carranza, S.; Odierna, G. Description of a new endemic species of mountain lizard from Northwestern Spain: *Iberolacerta galani* sp. nov. (Squamata: Lacertidae). *Zootaxa* **2006**, *1240*, 1–55. <https://doi.org/10.5281/zenodo.172862>.
138. Qin, P.S.; Tao, C.R.; Yin, S.; Li, H.M.; Zeng, D.L.; Qin, X.M. Complete mitochondrial genome of *Lacerta agilis* (Squamata, Lacertidae). *Mitochondrial DNA* **2014**, *25*, 416–417. <https://doi.org/10.3109/19401736.2013.809436>.
139. Kolora, S.R.; Faria, R.; Weigert, A.; Schaffer, S.; Grimm, A.; Henle, K.; Sahyoun, A.H.; Stadler, P.F.; Nowick, K.; Bleidorn, C.; et al. The complete mitochondrial genome of *Lacerta bilineata* and comparison with its closely related congener *L. viridis*. *Mitochondrial DNA A* **2015**, *28*, 116–118. <https://doi.org/10.3109/19401736.2015.1111349>.
140. Saberi-Pirooz, R.; Rajabi-Maham, H.; Ahmadzadeh, F.; Kiabi, B.H.; Javidkar, M.; Carretero, M.A. Pleistocene climate fluctuations as the major driver of genetic diversity and distribution patterns of the Caspian green lizard, *Lacerta strigata* Eichwald, 1831. *Ecol. Evol.* **2021**, *11*, 6927–6940. <https://doi.org/10.1002/ece3.7543>.
141. Godinho, R.; Crespo, E.; Ferrand, N.; Harris, D.J. Phylogeny and evolution of the green lizards, *Lacerta* spp. (Squamata: Lacertidae) based on mitochondrial and nuclear DNA sequences. *Amphib-Reptil* **2005**, *26*, 271–285. DOI: 10.1163/156853805774408667.
142. Beyerlein, P.; Mayer, W. *Lacerta kulzeri*-Its phylogenetic relationships as indicated by DNA sequences. *Natura Croatica* **1999**, *8*, 181.
143. Böhme, M.U.; Frittsch, G.; Tippmann, A.; Schlegel, M.; Berendonk, T.U. The complete mitochondrial genome of the green lizard *Lacerta viridis viridis* (Reptilia: Lacertidae) and its phylogenetic position within squamate reptiles. *Gene* **2007**, *394*, 69–77. <https://doi.org/10.1016/j.gene.2007.02.006>.
144. Childers, J.L.; Kirchhof, S.; Bauer, A.M. Lizards of a different stripe: phylogenetics of the *Pedioplanis undata* species complex (Squamata, Lacertidae), with the description of two new species. *Zoosyst. Evol.* **2021**, *97*, 249–272. <https://doi.org/10.3897/zse.97.61351>.
145. Lamb, T.; Bauer, A.M. *Meroles* revisited: complementary systematic inference from additional mitochondrial genes and complete taxon sampling of southern Africa's desert lizards. *Mol. Phylogenet. Evol.* **2003**, *29*, 360–364. [https://doi.org/10.1016/S1055-7903\(03\)00137-4](https://doi.org/10.1016/S1055-7903(03)00137-4).
146. Podnar, M.; Pinsker, W.; Mayer, W. Complete mitochondrial genomes of three lizard species and the systematic position of the Lacertidae (Squamata). *J. Zool. Syst. Evol. Res.* **2009**, *47*, 35–41. <https://doi.org/10.1111/j.1439-0469.2008.00515.x>.
147. Tamar, K.; Carranza, S.; In den Bosch, H.; Sindaco, R.; Moravec, J.; Meiri, S. Hidden relationships and genetic diversity: Molecular phylogeny and phylogeography of the Levantine lizards of the genus *Phoenicolacerta* (Squamata: Lacertidae). *Mol. Phylogenet. Evol.* **2015**, *91*, 86–97. <https://doi.org/10.1016/j.ympev.2015.05.002>.
148. Oliverio, M.; Bologna, M.A.; Mariottini, P. Molecular biogeography of the Mediterranean lizards *Podarcis* Wagler, 1830 and *Teira* Gray, 1838 (Reptilia, Lacertidae). *J. Biogeogr.* **2000**, *27*, 1403–1420. <https://doi.org/10.1046/j.1365-2699.2000.00517.x>.

149. Harris, D.J.; Sa-Sousa, P. Molecular phylogenetics of Iberian wall lizards (*Podarcis*): is *Podarcis hispanica* a species complex? *Mol. Phylogenet. Evol.* **2002**, *23*, 75–81. <https://doi.org/10.1163/156853805774408667>
150. Poulakakis, N.; Lymberakis, P.; Antoniou, A.; Chalkia, D.; Zouros, E.; Mylonas, M.; Valakos, E. Molecular phylogeny and biogeography of the wall-lizard *Podarcis erhardii* (Squamata: Lacertidae). *Mol. Phylogenet. Evol.* **2003**, *28*, 38–46. [https://doi.org/10.1016/s1055-7903\(03\)00037-x](https://doi.org/10.1016/s1055-7903(03)00037-x).
151. Salvi, D.; Pinho, C.; Mendes, J.; Harris, D.J. Fossil-calibrated time tree of *Podarcis* wall lizards provides limited support for biogeographic calibration models. *Mol. Phylogenet. Evol.* **2021**, *161*, 107–169. <https://doi.org/10.1016/j.ympev.2021.107169>.
152. Oliverio, M.; Bologna, M.A.; Monciotti, A.; Annesi, F.; Mariottini, P. Molecular phylogenetics of the Italian *Podarcis* lizards (Reptilia, Lacertidae). *Ital. J. Zool.* **1998**, *65*, 315–324. <https://doi.org/10.1046/j.1365-2699.2000.00517.x>.
153. Brown, R.P.; Terrasa, B.; Pérez-Mellado, V.; Castro, J.A.; Hoskisson, P.A.; Picornell, A.; Ramon, M.M. Bayesian estimation of post-Messinian divergence times in Balearic Island lizards. *Mol. Phylogenet. Evol.* **2008**, *48*, 350–358. <https://doi.org/10.1016/j.ympev.2008.04.013>.
154. Rodríguez, V.; Buades, J.M.; Brown, R.P. Terrasa, B.; Pérez-Mellado, V.; Corti, C.; Delaunay, M.; Castro, J.A.; Picornell, A.; Ramon, M.M. Evolutionary history of *Podarcis tiliguerta* on Corsica and Sardinia. *BMC Evol. Biol.* **2017**, *17*, 1–12. <https://doi.org/10.1186/s12862-016-0860-4>.
155. Taverne, M.; Gillies, N.K.; Krajnović, M.; Lisičić, D.; Mira, Ó.; Petricoli, D.; Sabolić, I.; Štambuk, A.; Tadić, Z.; Vigliotti, C.; et al. Proximate and ultimate drivers of variation in bite force in the insular lizards *Podarcis melisellensis* and *Podarcis sicula*. *Biol. J. Linn. Soc.* **2020**, *131*, 88–108. <https://doi.org/10.1093/biolinnean/blaa091>.
156. Podnar, M.; Mayer, W.; Tvrtković, N. Mitochondrial phylogeography of the Dalmatian wall lizard, *Podarcis melisellensis* (Lacertidae). *Org. Divers. Evol.* **2004**, *4*, 307–317. <https://doi.org/10.1111/j.1439-0469.2008.00515.x>.
157. Buades, J.M.; Rodríguez, V.; Terrasa, B.; Pérez-Mellado, V.; Brown, R.P.; Castro, J.A.; Picornell, A.; Ramon, M.M. Variability of the mcl1r Gene in Melanic and Non-Melanic *Podarcis lilfordi* and *Podarcis pityusensis* from the Balearic Archipelago. *PLoS One* **2013**, *8*, e53088. <https://doi.org/10.1371/journal.pone.0053088>.
158. Reháč, I.; Fischer, D.; Kratochvíl, L.; Rovatsos, M. Origin and haplotype diversity of the northernmost population of *Podarcis tauricus* (Squamata, Lacertidae): Do lizards respond to climate change and go north? *Biodiversity Data Journal* **2022**, *10*, e82156. <https://doi.org/10.3897/BDJ.10.e82156>.
159. Ma, W.W.; Liu, H.; Zhao, W.G.; Liu, P. The complete mitochondrial genome of *Takydromus amurensis* (Squamata: Lacertidae). *Mitochondrial DNA B* **2016**, *1*, 214–215. <https://doi.org/10.1080/23802359.2016.1155091>.
160. Tseng, S.P.; Wang, C.J.; Li, S.H.; Lin, S.M. Within-island speciation with an exceptional case of distinct separation between two sibling lizard species divided by a narrow stream. *Mol. Phylogenet. Evol.* **2015**, *90*, 164–75. <https://doi.org/10.1016/j.ympev.2015.04.022>.
161. Lin, S.M.; Chen, C.A.; Lue, K.Y. Molecular phylogeny and biogeography of the grass lizards genus *Takydromus* (Reptilia: Lacertidae) of East Asia. *Mol. Phylogenet. Evol.* **2002**, *22*, 276–288. <https://doi.org/10.1006/mpev.2001.1059>.
162. Wang, J.; Lyu, Z.T.; Yang, C.Y.; Li, Y.L.; Wang, Y.Y. A new species of the genus *Takydromus* (Squamata, Lacertidae) from southwestern Guangdong, China. *ZooKeys* **2019**, *871*, 119. <https://doi.org/10.3897/zookeys.871.35947>.
163. Wu, L.X.; Luo, K.N.; Ding, G.H. Complete mitochondrial genome of *Takydromus kuehnei* (Squamata: Takydromus) and its phylogenetic analysis. *Mitochondrial DNA B* **2022**, *7*, 764–765. <https://doi.org/10.1080/23802359.2022.2070440>.
164. Hu, J.G.; Peng, L.F.; Tang, X.S.; Huang, S. The complete mitochondrial genome of *Takydromus septentrionalis* (Reptilia: Lacertidae). *Mitochondrial DNA B* **2019**, *4*, 2193–2194. <https://doi.org/10.1080/23802359.2019.1623123>.
165. Qin, P.S.; Zeng, D.L.; Hou, L.X.; Yang, X.W.; Qin, X.M. Complete mitochondrial genome of *Takydromus sexlineatus* (Squamata, Lacertidae). *Mitochondrial DNA* **2015**, *26*, 465–466. <https://doi.org/10.3109/19401736.2013.830299>.
166. Tang, X.S.; Chen, J.M.; Huang, S. Mitochondrial genome of the Chung-an ground lizard *Takydromus sylvaticus* (Reptilia: Lacertidae). *Mitochondrial DNA* **2014**, *25*, 319–320. <https://doi.org/10.3109/19401736.2013.800488>.
167. Yu, D.N.; Ji, X. The complete mitochondrial genome of *Takydromus wolteri* (Squamata: Lacertidae). *Mitochondrial DNA* **2013**, *24*, 3–5. <https://doi.org/10.3109/19401736.2012.710223>.
168. Silva-Rocha, I.; Sá-Sousa, P.; Fariña, B.; Carretero, M.A. Molecular analysis confirms Madeira as source for insular and continental introduced populations of *Teira dugesii* (Sauria: Lacertidae). *Salamandra* **2016**, *523*, 269–272.
169. Ahmadzadeh, F.; Carretero, M.A.; Harris, D.J.; Perera, A.; Böhme, W. A molecular phylogeny of the eastern group of ocellated lizard genus *Timon* (Sauria: Lacertidae) based on mitochondrial and nuclear DNA sequences. *Amphib-Reptil* **2012**, *33*, 1–10. <https://doi.org/10.1163/156853811x619718>.
170. Liu, P.; Zhu, D.; Zhao, W.G.; Ji, X. The complete mitochondrial genome of the common lizard *Zootoca vivipara* (Squamata: Lacertidae). *Mitochondrial DNA A* **2016**, *27*, 1944–1945. <https://doi.org/10.3109/19401736.2014.971299>.

**Table S4** Climatic factors from WorldClim used in ENM and their contribution rates.

| <b>ID</b> | <b>Environment Variable</b>                          | <b>Contribution Rates<br/>with SD</b> | <b>Permutation<br/>importance</b> |
|-----------|------------------------------------------------------|---------------------------------------|-----------------------------------|
| Bio1      | Annul mean temperature                               | 38.28±6.20                            | 31.14                             |
| Bio2      | Mean diurnal range                                   | 1.21±0.80                             | 2.28                              |
| Bio3      | Isothermality                                        | 0.34±0.40                             | 0.17                              |
| Bio4      | Temperature seasonality                              | 9.34±3.08                             | 1.00                              |
| Bio5      | Max Temperature of Warmest Month                     | 2.53±2.07                             | 9.28                              |
| Bio12     | Annual precipitation                                 | 21.50±4.23                            | 50.25                             |
| Bio14     | Precipitation of driest month                        | 15.30±8.00                            | 0.94                              |
| Bio15     | Precipitation seasonality (coefficient of variation) | 11.56±6.68                            | 4.95                              |

**Table S5** Climatic factors from PaleoClim used in ENM and their contribution rates.

| <b>ID</b> | <b>Environment Variable</b>                          | <b>Contribution Rates<br/>with SD</b> | <b>Permutation<br/>importance</b> |
|-----------|------------------------------------------------------|---------------------------------------|-----------------------------------|
| Bio1      | Annul mean temperature                               | 41.61±4.86                            | 51.93                             |
| Bio4      | Temperature seasonality                              | 12.44±3.07                            | 3.474                             |
| Bio12     | Annual precipitation                                 | 20.13±2.07                            | 42.54                             |
| Bio14     | Precipitation of driest month                        | 21.61±8.49                            | 0.71                              |
| Bio15     | Precipitation seasonality (coefficient of variation) | 4.21±4.08                             | 1.36                              |



**Table S6** Occurrence records with coordinates for *Eremias argus* retrieved from literature and GBIF.

| Site number | Longitude (E) | Latitude (N) | Reference |
|-------------|---------------|--------------|-----------|
| 1           | 126.89        | 38.33        | [23]      |
| 2           | 125.83        | 39.07        | [23]      |
| 3           | 128.12        | 38.65        | [23]      |
| 4           | 126.35        | 40.42        | [23]      |
| 5           | 117.13        | 42.2         | [25]      |
| 6           | 118.3         | 32.3         | [32]      |
| 7           | 108.9         | 34           | [32]      |
| 8           | 112.6         | 35.1         | [32]      |
| 9           | 100.5         | 36.4         | [32]      |
| 10          | 114.5         | 36.6         | [32]      |
| 11          | 113.6         | 37.9         | [32]      |
| 12          | 107.5         | 39.5         | [32]      |
| 13          | 126.6         | 45.7         | [32]      |
| 14          | 101.71        | 43.1         | [77]      |
| 15          | 100.43        | 43.66        | [77]      |
| 16          | 103.72        | 44.13        | [77]      |
| 17          | 110.13        | 44.69        | [77]      |
| 18          | 113.13        | 45.3         | [77]      |
| 19          | 105.42        | 45.48        | [77]      |
| 20          | 112.68        | 45.67        | [77]      |
| 21          | 97.2          | 45.75        | [77]      |
| 22          | 108.64        | 46.37        | [77]      |
| 23          | 91.54         | 46.5         | [77]      |
| 24          | 113.79        | 46.94        | [77]      |
| 25          | 114.18        | 47.29        | [77]      |
| 26          | 92.18         | 47.48        | [77]      |
| 27          | 104.17        | 47.83        | [77]      |
| 28          | 104.31        | 47.84        | [77]      |
| 29          | 114.46        | 48.06        | [77]      |
| 30          | 101.92        | 43.22        | [78]      |
| 31          | 104.42        | 43.58        | [78]      |
| 32          | 112.75        | 43.73        | [78]      |
| 33          | 98.87         | 45.45        | [78]      |
| 34          | 112.77        | 45.7         | [78]      |
| 35          | 117.67        | 46.83        | [78]      |
| 36          | 102.83        | 49.42        | [78]      |
| 37          | 106.25        | 42.46        | [79]      |
| 38          | 105.25        | 42.48        | [79]      |
| 39          | 106.79        | 42.53        | [79]      |
| 40          | 105.34        | 42.65        | [79]      |
| 41          | 109.9         | 42.73        | [79]      |
| 42          | 109.71        | 42.8         | [79]      |
| 43          | 109.64        | 42.86        | [79]      |
| 44          | 98.66         | 42.87        | [79]      |

---

|    |        |       |      |
|----|--------|-------|------|
| 45 | 98.82  | 42.88 | [79] |
| 46 | 98.64  | 42.93 | [79] |
| 47 | 98.09  | 42.95 | [79] |
| 48 | 98.66  | 42.96 | [79] |
| 49 | 98.69  | 42.98 | [79] |
| 50 | 108.91 | 43    | [79] |
| 51 | 98.71  | 43.01 | [79] |
| 52 | 109.38 | 43.04 | [79] |
| 53 | 101.16 | 43.07 | [79] |
| 54 | 109.15 | 43.08 | [79] |
| 55 | 101.56 | 43.09 | [79] |
| 56 | 97.98  | 43.11 | [79] |
| 57 | 107.48 | 43.11 | [79] |
| 58 | 102.02 | 43.16 | [79] |
| 59 | 102    | 43.18 | [79] |
| 60 | 107.2  | 43.19 | [79] |
| 61 | 97.87  | 43.21 | [79] |
| 62 | 105.8  | 43.22 | [79] |
| 63 | 101.05 | 43.23 | [79] |
| 64 | 98.99  | 43.25 | [79] |
| 65 | 99.01  | 43.25 | [79] |
| 66 | 100.98 | 43.26 | [79] |
| 67 | 102.16 | 43.28 | [79] |
| 68 | 106.09 | 43.3  | [79] |
| 69 | 97.79  | 43.31 | [79] |
| 70 | 109.15 | 43.33 | [79] |
| 71 | 105.01 | 43.35 | [79] |
| 72 | 102.51 | 43.38 | [79] |
| 73 | 102.43 | 43.39 | [79] |
| 74 | 103.92 | 43.4  | [79] |
| 75 | 99.11  | 43.41 | [79] |
| 76 | 100.57 | 43.44 | [79] |
| 77 | 102.84 | 43.44 | [79] |
| 78 | 103.41 | 43.44 | [79] |
| 79 | 101.24 | 43.48 | [79] |
| 80 | 102.91 | 43.48 | [79] |
| 81 | 102.94 | 43.49 | [79] |
| 82 | 97.91  | 43.52 | [79] |
| 83 | 100.03 | 43.54 | [79] |
| 84 | 103.02 | 43.55 | [79] |
| 85 | 104.04 | 43.55 | [79] |
| 86 | 100.07 | 43.58 | [79] |
| 87 | 99.14  | 43.61 | [79] |
| 88 | 110.58 | 43.62 | [79] |
| 89 | 97.96  | 43.63 | [79] |
| 90 | 101.18 | 43.63 | [79] |

---

---

|     |        |       |      |
|-----|--------|-------|------|
| 91  | 99.16  | 43.65 | [79] |
| 92  | 101.23 | 43.65 | [79] |
| 93  | 97.95  | 43.68 | [79] |
| 94  | 100.95 | 43.72 | [79] |
| 95  | 100.94 | 43.75 | [79] |
| 96  | 97.98  | 43.98 | [79] |
| 97  | 99.73  | 43.98 | [79] |
| 98  | 101.39 | 43.99 | [79] |
| 99  | 97.98  | 44.13 | [79] |
| 100 | 99.46  | 44.13 | [79] |
| 101 | 99.26  | 44.17 | [79] |
| 102 | 110.23 | 44.18 | [79] |
| 103 | 98.13  | 44.39 | [79] |
| 104 | 98.17  | 44.56 | [79] |
| 105 | 99.3   | 44.63 | [79] |
| 106 | 94.92  | 44.66 | [79] |
| 107 | 97.56  | 44.73 | [79] |
| 108 | 110.14 | 44.79 | [79] |
| 109 | 97.32  | 44.81 | [79] |
| 110 | 94.96  | 44.84 | [79] |
| 111 | 110.16 | 44.87 | [79] |
| 112 | 94.98  | 44.89 | [79] |
| 113 | 96.25  | 44.93 | [79] |
| 114 | 96.78  | 44.93 | [79] |
| 115 | 96.26  | 44.94 | [79] |
| 116 | 96.82  | 45.06 | [79] |
| 117 | 95.13  | 45.12 | [79] |
| 118 | 92.16  | 45.13 | [79] |
| 119 | 95.44  | 45.14 | [79] |
| 120 | 95.45  | 45.14 | [79] |
| 121 | 95.49  | 45.14 | [79] |
| 122 | 109.98 | 45.15 | [79] |
| 123 | 91.41  | 45.17 | [79] |
| 124 | 95.94  | 45.21 | [79] |
| 125 | 91.08  | 45.24 | [79] |
| 126 | 90.94  | 45.26 | [79] |
| 127 | 93.64  | 45.26 | [79] |
| 128 | 99.51  | 45.3  | [79] |
| 129 | 93.2   | 45.36 | [79] |
| 130 | 93.61  | 45.38 | [79] |
| 131 | 92.4   | 45.43 | [79] |
| 132 | 92.5   | 45.48 | [79] |
| 133 | 93.59  | 45.51 | [79] |
| 134 | 92.15  | 45.53 | [79] |
| 135 | 92.86  | 45.54 | [79] |
| 136 | 93.07  | 45.54 | [79] |

---

---

|     |        |       |       |
|-----|--------|-------|-------|
| 137 | 92.34  | 45.56 | [79]  |
| 138 | 90.97  | 45.59 | [79]  |
| 139 | 93.31  | 45.59 | [79]  |
| 140 | 91.11  | 45.71 | [79]  |
| 141 | 93.23  | 45.73 | [79]  |
| 142 | 92.5   | 45.75 | [79]  |
| 143 | 91.18  | 45.76 | [79]  |
| 144 | 96.9   | 45.82 | [79]  |
| 145 | 99.26  | 45.82 | [79]  |
| 146 | 96.35  | 45.91 | [79]  |
| 147 | 93.13  | 45.99 | [79]  |
| 148 | 91.26  | 46.03 | [79]  |
| 149 | 91.11  | 46.1  | [79]  |
| 150 | 108.71 | 46.11 | [79]  |
| 151 | 94.55  | 46.13 | [79]  |
| 152 | 91.07  | 46.14 | [79]  |
| 153 | 95.51  | 46.14 | [79]  |
| 154 | 94.91  | 46.15 | [79]  |
| 155 | 91.58  | 46.17 | [79]  |
| 156 | 95.11  | 46.2  | [79]  |
| 157 | 95.26  | 46.26 | [79]  |
| 158 | 95.39  | 46.29 | [79]  |
| 159 | 108.86 | 46.34 | [79]  |
| 160 | 95.84  | 46.36 | [79]  |
| 161 | 95.69  | 46.37 | [79]  |
| 162 | 95.81  | 46.37 | [79]  |
| 163 | 91.4   | 46.68 | [79]  |
| 164 | 96.76  | 46.68 | [79]  |
| 165 | 103.64 | 47.4  | [79]  |
| 166 | 103.7  | 47.41 | [79]  |
| 167 | 103.76 | 47.48 | [79]  |
| 168 | 92.42  | 47.74 | [79]  |
| 169 | 126.38 | 36.41 | [88]  |
| 170 | 126.38 | 36.41 | [171] |
| 171 | 126.28 | 36.65 | [172] |
| 172 | 126.36 | 36.4  | [173] |
| 173 | 114.47 | 36.6  | [174] |
| 174 | 105.94 | 38.57 | [175] |
| 175 | 109.31 | 42.13 | [176] |
| 176 | 126.20 | 36.80 | [177] |
| 177 | 127.70 | 37.80 | [177] |
| 178 | 127.10 | 37.60 | [177] |
| 179 | 126.60 | 36.00 | [177] |
| 180 | 127.20 | 37.20 | [177] |
| 181 | 127.20 | 36.90 | [177] |
| 182 | 126.80 | 37.80 | [177] |

---

|     |        |       |       |
|-----|--------|-------|-------|
| 183 | 127.10 | 36.50 | [177] |
| 184 | 117.10 | 36.20 | [177] |
| 185 | 105.00 | 48.00 | [177] |
| 186 | 113.50 | 46.30 | [177] |
| 187 | 117.80 | 47.50 | [177] |
| 188 | 102.50 | 36.20 | [177] |
| 189 | 109.00 | 33.90 | [177] |
| 190 | 115.90 | 40.30 | [177] |
| 191 | 121.40 | 37.50 | [177] |
| 192 | 119.40 | 39.80 | [177] |
| 193 | 114.30 | 30.60 | [177] |
| 194 | 106.00 | 38.60 | [177] |
| 195 | 121.70 | 37.40 | [177] |
| 196 | 116.40 | 40.30 | [177] |
| 197 | 114.30 | 38.10 | [177] |
| 198 | 118.90 | 39.20 | [177] |
| 199 | 103.44 | 47.34 | [177] |
| 200 | 103.80 | 36.12 | [177] |
| 201 | 104.25 | 49.19 | [177] |
| 202 | 105.30 | 47.88 | [177] |
| 203 | 107.54 | 51.76 | [177] |
| 204 | 109.50 | 41.42 | [177] |
| 205 | 109.65 | 38.67 | [177] |
| 206 | 110.29 | 39.95 | [177] |
| 207 | 110.50 | 42.07 | [177] |
| 208 | 110.51 | 41.62 | [177] |
| 209 | 112.16 | 42.09 | [177] |
| 210 | 112.73 | 45.85 | [177] |
| 211 | 113.90 | 41.10 | [177] |
| 212 | 115.72 | 43.34 | [177] |
| 213 | 115.75 | 43.36 | [177] |
| 214 | 115.82 | 40.38 | [177] |
| 215 | 116.14 | 43.83 | [177] |
| 216 | 116.20 | 40.66 | [177] |
| 217 | 117.27 | 48.59 | [177] |
| 218 | 122.38 | 42.82 | [177] |
| 219 | 122.47 | 42.77 | [177] |
| 220 | 123.17 | 42.83 | [177] |

## References

23. Szyndlar, Z. Distributional records for turtles and lizards from North Korea. *Herpetol. Rev.* **1991**, 22, 27.
25. Zeng, Z.G.; Bi, J.H.; Li, S.R.; Chen, S.Y.; Du, W.G. Habitat alteration influences a desert steppe lizard community: implications of species specific preferences and performance. *Herpetol. Monogr.* **2016**, 30, 34–48. <https://doi.org/10.1655/HERPMONOGRAPHS-D-14-00008.1>.
32. Zhao, Q.; Liu, H.X.; Luo, L.G.; Ji, X. Comparative population genetics and phylogeography of two lacertid lizards (*Eremias argus* and *E. brenchleyi*) from China. *Mol. Phylogenet. Evol.* **2011**, 58, 478–491. <https://doi.org/10.1016/j.ympev.2010.12.017>.

77. Alberto, S.V.; Marta, C.; Mario, G.P.; Judit, V.; José, G.A. Amphibians and reptiles from Zoltan Kaszab's expeditions to Mongolia held at the Hungarian Natural History Museum. *Acta Zool. Acad. Sci. H.* **2019**, *65*, 143–166. <https://doi.org/10.17109/AZH.65.2.143.2019>.
78. Ananjeva, N.B.; Munkhbayar, K.; Orlov, N.L.; Orlova, V.F.; Semenov, D.V.; Terbish, K. *Amphibians and reptiles of Mongolia. Reptiles of Mongolia*; KMK Press: Moscow, Russia, 1997. (in Russian with English summary)
79. Buehler, M.D.; Zoljargal, P.; Purvee, E. Batsaikhan, N.; Ananjeva, N.B.; Orlov, N.L.; Panpenfuss, T.J.; Roldán-Piña, D. The results of four recent joint expedition to the Gobi Desert: lacertids and agamids. *Russ. J. Herpetol.* **2021**, *28*, 15–32. <https://doi.org/10.30906/1026-2296-2021-28-1-15-32>.
88. Chang, M.H.; Song, J.Y.; Koo, K.S. Effect of coastal dune restoration on the population of endangered Mongolian racerunner (*Eremias argus*) in the Republic of Korea. *J. Coast. Conserv.* **2021**, *25*, 29. <https://doi.org/10.1007/s11852-021-00820-9>.
171. Kim, J.K.; Song, J.Y.; Lee, J.H.; Park, D. Physical characteristics and age structure of Mongolian racerunner (*Eremias argus*; Lacertidae; Reptilia). *J. Ecol. Field Biol.* **2010**, *33*, 325–331. <https://doi.org/10.5141/JEFB.2010.33.4.325>.
172. Kim, B.N.; Kyeong, K.G.; Park, D. Mating behavior of the Mongolian racerunner (*Eremias argus*; Lacertidae, Reptilia). *Anim. Cells Syst.* **2012**, *16*, 4, 337–342. <https://doi.org/10.1080/19768354.2012.657242>.
173. Song, J.; Koo, K.; Chang, M. Movement and home range of the Mongolian racerunner, *Eremias argus* (Squamata: lacertidae): A preliminary result. *Korean J. Herpetol.* **2010**, *2*, 17–21.
174. Ma, L.; Guo, K.; Su, S.; Lin, L.H.; Xia, Y.; Ji, X. Age-related reproduction of female Mongolian racerunners (*Eremias argus*; Lacertidae): Evidence of reproductive senescence. *J. Exp. Zool.* **2019**, *331*, 290–298. <https://doi.org/10.1002/jez.2264>.
175. Zhang, Z.R.; Zhu, Q.; Chen, J.D.; Khattak, R.H.; Li, Z.; Teng, L.; Liu, Z. Insights into the composition of gut microbiota in response to environmental temperature: The case of the Mongolia racerunner (*Eremias argus*). *Glob. Ecol. Conserv.* **2022**, *36*, e02125. <https://doi.org/10.1016/j.gecco.2022.e02125>.
176. Huang, X.B.; Wu, H.H.; Tu, X.B.; Zhang, Z.; Su, H.; Shi, Y.; Wang, G.; Cao, G.; Nong, X.; Zhang, Z. Diets structure of a common lizard *Eremias argus* and their effects on grasshoppers: Implications for a potential biological agent. *J. Asia-Pac. Entomol.* **2016**, *19*, 133–138. <https://doi.org/10.1016/j.aspen.2015.12.013>.
177. GBIF: The Global Biodiversity Information Facility (2022) What is GBIF? [Cited 7 Oct 2023.] Available from URL: <https://www.gbif.org/what-is-gbif>.

**Table S7** Coordinates used for ecological niche modeling.

| Site number | Lon    | Lat   | Reference  |
|-------------|--------|-------|------------|
| 1           | 126.89 | 38.33 | [23]       |
| 2           | 125.83 | 39.07 | [23]       |
| 3           | 128.12 | 38.65 | [23]       |
| 4           | 126.35 | 40.42 | [23]       |
| 5           | 117.13 | 42.2  | [25]       |
| 6           | 118.3  | 32.3  | [32]       |
| 7           | 112.6  | 35.1  | [32]       |
| 8           | 113.13 | 45.3  | [77]       |
| 9           | 105.42 | 45.48 | [77]       |
| 10          | 114.18 | 47.29 | [77]       |
| 11          | 114.46 | 48.06 | [77]       |
| 12          | 117.67 | 46.83 | [78]       |
| 13          | 102.83 | 49.42 | [79]       |
| 14          | 105.25 | 42.48 | [79]       |
| 15          | 106.79 | 42.53 | [79]       |
| 16          | 98.82  | 42.88 | [79]       |
| 17          | 97.98  | 43.11 | [79]       |
| 18          | 107.48 | 43.11 | [79]       |
| 19          | 102.02 | 43.16 | [79]       |
| 20          | 109.15 | 43.33 | [79]       |
| 21          | 103.41 | 43.44 | [79]       |
| 22          | 97.91  | 43.52 | [79]       |
| 23          | 100.07 | 43.58 | [79]       |
| 24          | 110.58 | 43.62 | [79]       |
| 25          | 101.39 | 43.99 | [79]       |
| 26          | 99.3   | 44.63 | [79]       |
| 27          | 96.25  | 44.93 | [79]       |
| 28          | 109.98 | 45.15 | [79]       |
| 29          | 92.5   | 45.48 | [79]       |
| 30          | 96.9   | 45.82 | [79]       |
| 31          | 99.26  | 45.82 | [79]       |
| 32          | 108.71 | 46.11 | [79]       |
| 33          | 94.55  | 46.13 | [79]       |
| 34          | 91.58  | 46.17 | [79]       |
| 35          | 96.76  | 46.68 | [79]       |
| 36          | 103.64 | 47.4  | [79]       |
| 37          | 92.42  | 47.74 | [79]       |
| 38          | 126.38 | 36.41 | [171]      |
| 39          | 114.47 | 36.6  | [173]      |
| 40          | 105.94 | 38.57 | [175]      |
| 41          | 109.31 | 42.13 | [176]      |
| 42          | 108.83 | 33.99 | This study |
| 43          | 114.37 | 34.81 | This study |
| 44          | 104.17 | 35.97 | This study |

|    |        |       |            |
|----|--------|-------|------------|
| 45 | 100.35 | 36.28 | This study |
| 46 | 110.41 | 36.72 | This study |
| 47 | 121.70 | 36.84 | This study |
| 48 | 103.81 | 36.88 | This study |
| 49 | 106.17 | 37.45 | This study |
| 50 | 109.78 | 38.17 | This study |
| 51 | 107.70 | 38.18 | This study |
| 52 | 107.27 | 39.10 | This study |
| 53 | 122.17 | 39.56 | This study |
| 54 | 110.85 | 40.05 | This study |
| 55 | 115.82 | 40.38 | [177]      |
| 56 | 105.30 | 47.88 | [177]      |
| 57 | 117.09 | 35.79 | [177]      |
| 58 | 108.68 | 39.27 | [177]      |
| 59 | 111.81 | 40.58 | [177]      |
| 60 | 108.50 | 41.34 | This study |
| 61 | 110.84 | 41.44 | This study |
| 62 | 113.48 | 41.55 | This study |
| 63 | 110.33 | 42.48 | This study |
| 64 | 112.58 | 42.86 | This study |
| 65 | 120.34 | 42.89 | This study |
| 66 | 107.46 | 51.73 | This study |
| 67 | 118.03 | 43.24 | This study |
| 68 | 122.24 | 43.24 | This study |
| 69 | 115.69 | 43.33 | This study |
| 70 | 113.13 | 43.76 | This study |
| 71 | 114.72 | 43.95 | This study |
| 72 | 115.92 | 44.20 | This study |
| 73 | 116.12 | 44.92 | This study |
| 74 | 126.22 | 45.58 | This study |
| 75 | 118.35 | 47.63 | This study |
| 76 | 117.38 | 48.29 | This study |
| 77 | 106.18 | 50.24 | This study |

## References

23. Szyndlar, Z. Distributional records for turtles and lizards from North Korea. *Herpetol. Rev.* **1991**, 22, 27.
25. Zeng, Z.G.; Bi, J.H.; Li, S.R.; Chen, S.Y.; Du, W.G. Habitat alteration influences a desert steppe lizard community: implications of species specific preferences and performance. *Herpetol. Monogr.* **2016**, 30, 34–48. <https://doi.org/10.1655/HERPMONOGRAPHS-D-14-00008.1>.
32. Zhao, Q.; Liu, H.X.; Luo, L.G.; Ji, X. Comparative population genetics and phylogeography of two lacertid lizards (*Eremias argus* and *E. brenchleyi*) from China. *Mol. Phylogenet. Evol.* **2011**, 58, 478–491. <https://doi.org/10.1016/j.ympev.2010.12.017>.
77. Alberto, S.V.; Marta, C.; Mario, G.P.; Judit, V.; José, G.A. Amphibians and reptiles from Zoltan Kaszab's expeditions to Mongolia held at the Hungarian Natural History Museum. *Acta Zool. Acad. Sci. H.* **2019**, 65, 143–166. <https://doi.org/10.17109/AZH.65.2.143.2019>.
78. Ananjeva, N.B.; Munkhbayar, K.; Orlov, N.L.; Orlova, V.F.; Semenov, D.V.; Terbish, K. *Amphibians and reptiles of Mongolia. Reptiles of Mongolia*; KMK Press: Moscow, Russia, 1997. (in Russian with English summary)



79. Buehler, M.D.; Zoljargal, P.; Purvec, E. Batsaikhan, N.; Ananjeva, N.B.; Orlov, N.L.; Panpenfuss, T.J.; Roldán-Piña, D. The results of four recent joint expedition to the Gobi Desert: lacertids and agamids. *Russ. J. Herpetol.* **2021**, *28*, 15–32. <https://doi.org/10.30906/1026-2296-2021-28-1-15-32>.
171. Kim, J.K.; Song, J.Y.; Lee, J.H.; Park, D. Physical characteristics and age structure of Mongolian racerunner (*Eremias argus*; Lacertidae; Reptilia). *J. Ecol. Field Biol.* **2010**, *33*, 325–331. <https://doi.org/10.5141/JEFB.2010.33.4.325>.
173. Song, J.; Koo, K.; Chang, M. Movement and home range of the Mongolian racerunner, *Eremias argus* (Squamata: lacertidae): A preliminary result. *Korean J. Herpetol.* **2010**, *2*, 17–21.
174. Ma, L.; Guo, K.; Su, S.; Lin, L.H.; Xia, Y.; Ji, X. Age-related reproduction of female Mongolian racerunners (*Eremias argus*; Lacertidae): Evidence of reproductive senescence. *J. Exp. Zool.* **2019**, *331*, 290–298. <https://doi.org/10.1002/jez.2264>.
175. Zhang, Z.R.; Zhu, Q.; Chen, J.D.; Khattak, R.H.; Li, Z.; Teng, L.; Liu, Z. Insights into the composition of gut microbiota in response to environmental temperature: The case of the Mongolia racerunner (*Eremias argus*). *Glob. Ecol. Conserv.* **2022**, *36*, e02125. <https://doi.org/10.1016/j.gecco.2022.e02125>.
176. Huang, X.B.; Wu, H.H.; Tu, X.B.; Zhang, Z.; Su, H.; Shi, Y.; Wang, G.; Cao, G.; Nong, X.; Zhang, Z. Diets structure of a common lizard *Eremias argus* and their effects on grasshoppers: Implications for a potential biological agent. *J. Asia-Pac. Entomol.* **2016**, *19*, 133–138. <https://doi.org/10.1016/j.aspen.2015.12.013>.
177. GBIF: The Global Biodiversity Information Facility (2022) What is GBIF? [Cited 7 Oct 2023.] Available from URL: <https://www.gbif.org/what-is-gbif>.

**Table S8** Hierarchical analysis of AMOVA for *Eremias argus*.

| Source of variation | <i>d.f.</i> | Sum of squares | Variance components | Percentage of variation | <i>F<sub>ct</sub>/F<sub>sc</sub>/F<sub>st</sub></i> |
|---------------------|-------------|----------------|---------------------|-------------------------|-----------------------------------------------------|
| Among groups        | 6           | 2202.005       | 5.24249 Va          | 34.98                   | 0.34983                                             |
| Among populations   | 100         | 3195.820       | 4.96200 Vb          | 33.11                   | 0.50928                                             |
| Within groups       |             |                |                     |                         |                                                     |
| Within populations  | 507         | 2419.261       | 4.78115 Vc          | 31.90                   | 0.68095                                             |
| Total               | 613         | 7817.086       | 14.98564            |                         |                                                     |

**Table S9** Descriptive statistics by subclade/clades of *Eremias argus*.

| Clade/ Subclade | <i>N</i> | Tajima's <i>D</i> | MNPD   | ND    | HD    | Fu's <i>F<sub>s</sub></i> | OMMD       | <i>SSD</i>  | <i>R<sub>g</sub></i> | <i>R<sub>2</sub></i> |
|-----------------|----------|-------------------|--------|-------|-------|---------------------------|------------|-------------|----------------------|----------------------|
| Ia              | 254      | −1.466            | 27.930 | 0.027 | 0.982 | −32.342***                | Multimodal | 0.003758    | 0.00204475           | 0.16350***           |
| Ib              | 72       | −2.094*           | 3.764  | 0.004 | 0.396 | −1.035                    | Multimodal | 0.036891    | 0.29763057           | 0.16098***           |
| Ic              | 26       | −0.703            | 17.822 | 0.017 | 0.858 | 0.596                     | Multimodal | 0.036288 ** | 0.05775148**         | 0.16164***           |
| Id              | 55       | −0.895            | 26.656 | 0.026 | 0.966 | −4.929**                  | Multimodal | 0.005882    | 0.00729676 **        | 0.16133***           |
| Ie              | 36       | 0.337             | 28.400 | 0.027 | 0.868 | 2.613                     | Multimodal | 0.031325*** | 0.0469614***         | 0.16236***           |
| If              | 105      | 0.136             | 26.398 | 0.025 | 0.925 | 6.700***                  | Multimodal | 0.018891 *  | 0.02207033 ***       | 0.16195***           |
| IIb             | 64       | −0.663            | 23.546 | 0.023 | 0.954 | −5.578**                  | Multimodal | 0.009910    | 0.01964405 ***       | 0.16116***           |
| IIa             | 2        | —                 | —      | —     | —     | —                         | —          | —           | —                    | —                    |
| Clade I         | 548      | −1.609            | 25.992 | 0.025 | 0.981 | −32.532***                | Multimodal | 0.004680    | 0.00164071           | 0.16152***           |
| Clade II        | 66       | −0.735            | 23.766 | 0.023 | 0.956 | −5.727**                  | Multimodal | 0.009265    | 0.01651767 ***       | 0.16105***           |

*N*, number of haplotypes; MNPD, mean number of base-pair differences; ND, nucleotide diversity; HD, haplotype diversity; OMMD, observed modality of mismatch distribution; *SSD*, sum of square deviation between the observed and simulated mismatch distributions; *R<sub>g</sub>*, raggedness index; *R<sub>2</sub>*, *R<sub>2</sub>* statistics. \**P* < 0.05; \*\**P* < 0.01; \*\*\**P* < 0.001.
